# Supplementary material for: A chromosomal-level genome assembly for the giant African snail Achatina fulica
Source: PubMed Central journal article supplement (PMC6802634; doi:10.1093/gigascience/giz124), 2019-10-21

## A chromosomal-level genome assembly for the giant African snail *Achatina fulica* --Manuscript Draft--

|                                                      |                                                                                                                                                                                                                                                                                                                                                                                                                                                                                                                                                                                                                                                                                                                                                                                                                                                                                                                                                                                                                                                                                                                                                                                                                                                                                                                                                                                                                                                                                                                                                                                                                                                                                                                                                                                                                                                                                                                                                                                                                                                                                                                                                                                                                                                               |              |
|------------------------------------------------------|---------------------------------------------------------------------------------------------------------------------------------------------------------------------------------------------------------------------------------------------------------------------------------------------------------------------------------------------------------------------------------------------------------------------------------------------------------------------------------------------------------------------------------------------------------------------------------------------------------------------------------------------------------------------------------------------------------------------------------------------------------------------------------------------------------------------------------------------------------------------------------------------------------------------------------------------------------------------------------------------------------------------------------------------------------------------------------------------------------------------------------------------------------------------------------------------------------------------------------------------------------------------------------------------------------------------------------------------------------------------------------------------------------------------------------------------------------------------------------------------------------------------------------------------------------------------------------------------------------------------------------------------------------------------------------------------------------------------------------------------------------------------------------------------------------------------------------------------------------------------------------------------------------------------------------------------------------------------------------------------------------------------------------------------------------------------------------------------------------------------------------------------------------------------------------------------------------------------------------------------------------------|--------------|
| <b>Manuscript Number:</b>                            | GIGA-D-19-00006R2                                                                                                                                                                                                                                                                                                                                                                                                                                                                                                                                                                                                                                                                                                                                                                                                                                                                                                                                                                                                                                                                                                                                                                                                                                                                                                                                                                                                                                                                                                                                                                                                                                                                                                                                                                                                                                                                                                                                                                                                                                                                                                                                                                                                                                             |              |
| <b>Full Title:</b>                                   | A chromosomal-level genome assembly for the giant African snail <i>Achatina fulica</i>                                                                                                                                                                                                                                                                                                                                                                                                                                                                                                                                                                                                                                                                                                                                                                                                                                                                                                                                                                                                                                                                                                                                                                                                                                                                                                                                                                                                                                                                                                                                                                                                                                                                                                                                                                                                                                                                                                                                                                                                                                                                                                                                                                        |              |
| <b>Article Type:</b>                                 | Data Note                                                                                                                                                                                                                                                                                                                                                                                                                                                                                                                                                                                                                                                                                                                                                                                                                                                                                                                                                                                                                                                                                                                                                                                                                                                                                                                                                                                                                                                                                                                                                                                                                                                                                                                                                                                                                                                                                                                                                                                                                                                                                                                                                                                                                                                     |              |
| <b>Funding Information:</b>                          | This work was supported by the National Key Research and Development Program of China (No. 2016YFC1200500 and 2016YFC1202000)                                                                                                                                                                                                                                                                                                                                                                                                                                                                                                                                                                                                                                                                                                                                                                                                                                                                                                                                                                                                                                                                                                                                                                                                                                                                                                                                                                                                                                                                                                                                                                                                                                                                                                                                                                                                                                                                                                                                                                                                                                                                                                                                 | Dr Ning Xiao |
| <b>Abstract:</b>                                     | <p><b>Background:</b><br/> <i>Achatina fulica</i> (<i>A. fulica</i>), also called the giant African snail, is the largest species in the reported terrestrial mollusks. Due to its voracious appetite, wide environmental adaptability, high growth rate and reproductive capacity, the species caused a world-wide invasion, mainly in Southeast Asia, Japan, the western Pacific islands and China. <i>A. fulica</i> is a pest that is able to damage agricultural crops, as well as an intermediate host of many parasites that can threaten human health. However, genomic information of <i>A. fulica</i> is still limited, hindering genetic and genomic studies with the aim to invasion control and management of the species.</p> <p><b>Finding:</b><br/> Using Kmer-based method, we estimated the <i>A. fulica</i> genome size to be 2.12 Gb with a high repeat content up to 71%. About 101.6 Gb genomic long-read data of <i>A. fulica</i> were generated from the PacBio sequencing platform and assembled to the first <i>A. fulica</i> genome of 1.85 Gb with a contig N50 length of 726 kb. Using contact information from the Hi-C sequencing data, we successfully anchored 99.32% contig sequences into 31 chromosomes, leading to the final contig and scaffold N50 length of 721 kb and 59.6 Mb, respectively. The continuity, completeness and accuracy were evaluated by genome comparison with other mollusk genomes, BUSCO assessment and genomic read mapping. 23,726 protein-coding genes were predicted from the assembled genome, among which 96.34% of the genes were functionally annotated. The phylogenetic analysis using whole-genome protein-coding genes revealed that <i>A. fulica</i> separated from the common ancestor with <i>Biomphalaria glabrata</i> around 182 million years ago.</p> <p><b>Conclusion:</b><br/> As our best knowledge, the <i>A. fulica</i> genome was the first terrestrial mollusk genome reported so far. The chromosome sequences of <i>A. fulica</i> will provide the research community a valuable resource for the population genetics and environmental adaptation studies for the species, and furthermore, for the chromosome level of evolution investigation within mollusks.</p> |              |
| <b>Corresponding Author:</b>                         | ning xiao<br><br>CHINA                                                                                                                                                                                                                                                                                                                                                                                                                                                                                                                                                                                                                                                                                                                                                                                                                                                                                                                                                                                                                                                                                                                                                                                                                                                                                                                                                                                                                                                                                                                                                                                                                                                                                                                                                                                                                                                                                                                                                                                                                                                                                                                                                                                                                                        |              |
| <b>Corresponding Author Secondary Information:</b>   |                                                                                                                                                                                                                                                                                                                                                                                                                                                                                                                                                                                                                                                                                                                                                                                                                                                                                                                                                                                                                                                                                                                                                                                                                                                                                                                                                                                                                                                                                                                                                                                                                                                                                                                                                                                                                                                                                                                                                                                                                                                                                                                                                                                                                                                               |              |
| <b>Corresponding Author's Institution:</b>           |                                                                                                                                                                                                                                                                                                                                                                                                                                                                                                                                                                                                                                                                                                                                                                                                                                                                                                                                                                                                                                                                                                                                                                                                                                                                                                                                                                                                                                                                                                                                                                                                                                                                                                                                                                                                                                                                                                                                                                                                                                                                                                                                                                                                                                                               |              |
| <b>Corresponding Author's Secondary Institution:</b> |                                                                                                                                                                                                                                                                                                                                                                                                                                                                                                                                                                                                                                                                                                                                                                                                                                                                                                                                                                                                                                                                                                                                                                                                                                                                                                                                                                                                                                                                                                                                                                                                                                                                                                                                                                                                                                                                                                                                                                                                                                                                                                                                                                                                                                                               |              |
| <b>First Author:</b>                                 | Yunhai Guo                                                                                                                                                                                                                                                                                                                                                                                                                                                                                                                                                                                                                                                                                                                                                                                                                                                                                                                                                                                                                                                                                                                                                                                                                                                                                                                                                                                                                                                                                                                                                                                                                                                                                                                                                                                                                                                                                                                                                                                                                                                                                                                                                                                                                                                    |              |
| <b>First Author Secondary Information:</b>           |                                                                                                                                                                                                                                                                                                                                                                                                                                                                                                                                                                                                                                                                                                                                                                                                                                                                                                                                                                                                                                                                                                                                                                                                                                                                                                                                                                                                                                                                                                                                                                                                                                                                                                                                                                                                                                                                                                                                                                                                                                                                                                                                                                                                                                                               |              |
| <b>Order of Authors:</b>                             | Yunhai Guo                                                                                                                                                                                                                                                                                                                                                                                                                                                                                                                                                                                                                                                                                                                                                                                                                                                                                                                                                                                                                                                                                                                                                                                                                                                                                                                                                                                                                                                                                                                                                                                                                                                                                                                                                                                                                                                                                                                                                                                                                                                                                                                                                                                                                                                    |              |
|                                                      | Yi Zhang                                                                                                                                                                                                                                                                                                                                                                                                                                                                                                                                                                                                                                                                                                                                                                                                                                                                                                                                                                                                                                                                                                                                                                                                                                                                                                                                                                                                                                                                                                                                                                                                                                                                                                                                                                                                                                                                                                                                                                                                                                                                                                                                                                                                                                                      |              |
|                                                      | Qin Liu                                                                                                                                                                                                                                                                                                                                                                                                                                                                                                                                                                                                                                                                                                                                                                                                                                                                                                                                                                                                                                                                                                                                                                                                                                                                                                                                                                                                                                                                                                                                                                                                                                                                                                                                                                                                                                                                                                                                                                                                                                                                                                                                                                                                                                                       |              |
|                                                      | Yun Huang                                                                                                                                                                                                                                                                                                                                                                                                                                                                                                                                                                                                                                                                                                                                                                                                                                                                                                                                                                                                                                                                                                                                                                                                                                                                                                                                                                                                                                                                                                                                                                                                                                                                                                                                                                                                                                                                                                                                                                                                                                                                                                                                                                                                                                                     |              |

|                                                |                                                                                                                                                                                                                                                                                                                                                                                                                                                                                                                                                                                                                                                                                                                                                                                                                                                                                                                                                                                                                                                                                                                                                                                                                                                                                                                                                                                                                                                                                                                                                                                                                                                                                                                                                                                                                                                                                                                                                                                                                                                                                                                                                                                                                                                                                                                                                                                                                                                                                                                                                                                                                                                                                                                                                                                                                                                                                                                                                                                                                                                                                                                                                                                                                                                                                                                                                                                                                                                                |
|------------------------------------------------|----------------------------------------------------------------------------------------------------------------------------------------------------------------------------------------------------------------------------------------------------------------------------------------------------------------------------------------------------------------------------------------------------------------------------------------------------------------------------------------------------------------------------------------------------------------------------------------------------------------------------------------------------------------------------------------------------------------------------------------------------------------------------------------------------------------------------------------------------------------------------------------------------------------------------------------------------------------------------------------------------------------------------------------------------------------------------------------------------------------------------------------------------------------------------------------------------------------------------------------------------------------------------------------------------------------------------------------------------------------------------------------------------------------------------------------------------------------------------------------------------------------------------------------------------------------------------------------------------------------------------------------------------------------------------------------------------------------------------------------------------------------------------------------------------------------------------------------------------------------------------------------------------------------------------------------------------------------------------------------------------------------------------------------------------------------------------------------------------------------------------------------------------------------------------------------------------------------------------------------------------------------------------------------------------------------------------------------------------------------------------------------------------------------------------------------------------------------------------------------------------------------------------------------------------------------------------------------------------------------------------------------------------------------------------------------------------------------------------------------------------------------------------------------------------------------------------------------------------------------------------------------------------------------------------------------------------------------------------------------------------------------------------------------------------------------------------------------------------------------------------------------------------------------------------------------------------------------------------------------------------------------------------------------------------------------------------------------------------------------------------------------------------------------------------------------------------------------|
|                                                | Guangyao Mao                                                                                                                                                                                                                                                                                                                                                                                                                                                                                                                                                                                                                                                                                                                                                                                                                                                                                                                                                                                                                                                                                                                                                                                                                                                                                                                                                                                                                                                                                                                                                                                                                                                                                                                                                                                                                                                                                                                                                                                                                                                                                                                                                                                                                                                                                                                                                                                                                                                                                                                                                                                                                                                                                                                                                                                                                                                                                                                                                                                                                                                                                                                                                                                                                                                                                                                                                                                                                                                   |
|                                                | Zhiyuan Yue                                                                                                                                                                                                                                                                                                                                                                                                                                                                                                                                                                                                                                                                                                                                                                                                                                                                                                                                                                                                                                                                                                                                                                                                                                                                                                                                                                                                                                                                                                                                                                                                                                                                                                                                                                                                                                                                                                                                                                                                                                                                                                                                                                                                                                                                                                                                                                                                                                                                                                                                                                                                                                                                                                                                                                                                                                                                                                                                                                                                                                                                                                                                                                                                                                                                                                                                                                                                                                                    |
|                                                | Eniola M. Abe                                                                                                                                                                                                                                                                                                                                                                                                                                                                                                                                                                                                                                                                                                                                                                                                                                                                                                                                                                                                                                                                                                                                                                                                                                                                                                                                                                                                                                                                                                                                                                                                                                                                                                                                                                                                                                                                                                                                                                                                                                                                                                                                                                                                                                                                                                                                                                                                                                                                                                                                                                                                                                                                                                                                                                                                                                                                                                                                                                                                                                                                                                                                                                                                                                                                                                                                                                                                                                                  |
|                                                | Jian Li                                                                                                                                                                                                                                                                                                                                                                                                                                                                                                                                                                                                                                                                                                                                                                                                                                                                                                                                                                                                                                                                                                                                                                                                                                                                                                                                                                                                                                                                                                                                                                                                                                                                                                                                                                                                                                                                                                                                                                                                                                                                                                                                                                                                                                                                                                                                                                                                                                                                                                                                                                                                                                                                                                                                                                                                                                                                                                                                                                                                                                                                                                                                                                                                                                                                                                                                                                                                                                                        |
|                                                | Zhongdao Wu                                                                                                                                                                                                                                                                                                                                                                                                                                                                                                                                                                                                                                                                                                                                                                                                                                                                                                                                                                                                                                                                                                                                                                                                                                                                                                                                                                                                                                                                                                                                                                                                                                                                                                                                                                                                                                                                                                                                                                                                                                                                                                                                                                                                                                                                                                                                                                                                                                                                                                                                                                                                                                                                                                                                                                                                                                                                                                                                                                                                                                                                                                                                                                                                                                                                                                                                                                                                                                                    |
|                                                | Shizhu Li                                                                                                                                                                                                                                                                                                                                                                                                                                                                                                                                                                                                                                                                                                                                                                                                                                                                                                                                                                                                                                                                                                                                                                                                                                                                                                                                                                                                                                                                                                                                                                                                                                                                                                                                                                                                                                                                                                                                                                                                                                                                                                                                                                                                                                                                                                                                                                                                                                                                                                                                                                                                                                                                                                                                                                                                                                                                                                                                                                                                                                                                                                                                                                                                                                                                                                                                                                                                                                                      |
|                                                | Xiaonong Zhou                                                                                                                                                                                                                                                                                                                                                                                                                                                                                                                                                                                                                                                                                                                                                                                                                                                                                                                                                                                                                                                                                                                                                                                                                                                                                                                                                                                                                                                                                                                                                                                                                                                                                                                                                                                                                                                                                                                                                                                                                                                                                                                                                                                                                                                                                                                                                                                                                                                                                                                                                                                                                                                                                                                                                                                                                                                                                                                                                                                                                                                                                                                                                                                                                                                                                                                                                                                                                                                  |
|                                                | Wei Hu                                                                                                                                                                                                                                                                                                                                                                                                                                                                                                                                                                                                                                                                                                                                                                                                                                                                                                                                                                                                                                                                                                                                                                                                                                                                                                                                                                                                                                                                                                                                                                                                                                                                                                                                                                                                                                                                                                                                                                                                                                                                                                                                                                                                                                                                                                                                                                                                                                                                                                                                                                                                                                                                                                                                                                                                                                                                                                                                                                                                                                                                                                                                                                                                                                                                                                                                                                                                                                                         |
|                                                | Ning Xiao                                                                                                                                                                                                                                                                                                                                                                                                                                                                                                                                                                                                                                                                                                                                                                                                                                                                                                                                                                                                                                                                                                                                                                                                                                                                                                                                                                                                                                                                                                                                                                                                                                                                                                                                                                                                                                                                                                                                                                                                                                                                                                                                                                                                                                                                                                                                                                                                                                                                                                                                                                                                                                                                                                                                                                                                                                                                                                                                                                                                                                                                                                                                                                                                                                                                                                                                                                                                                                                      |
| <b>Order of Authors Secondary Information:</b> |                                                                                                                                                                                                                                                                                                                                                                                                                                                                                                                                                                                                                                                                                                                                                                                                                                                                                                                                                                                                                                                                                                                                                                                                                                                                                                                                                                                                                                                                                                                                                                                                                                                                                                                                                                                                                                                                                                                                                                                                                                                                                                                                                                                                                                                                                                                                                                                                                                                                                                                                                                                                                                                                                                                                                                                                                                                                                                                                                                                                                                                                                                                                                                                                                                                                                                                                                                                                                                                                |
| <b>Response to Reviewers:</b>                  | <p>Reviewer #1: I would like to ask the authors for further explanation regarding RNA quality check. For publication, molecular dating should also be re-analyzed using standard calibration method based on fossil records.</p> <p>In the revised manuscript, information about transcriptome was added according to reviewers' suggestions. The authors described that "The RNA quality was checked using ... the 2100 Bioanalyzer (...) with RNA integrity number of 8." (lines 107-109). In general, molluscan total RNA does not show such a high RIN value because 28s rRNA peak is very low. Integrity of molluscan total RNA can be evaluated by checking a sharp peak of 18s rRNA around 1800-2000nt, while RIN is typically 3.0-6.0. Is it possible to show Bioanalyzer summary report?</p> <p>Reply: Thank you very much. We used the samples with RIN values more than 8 before library construction. We rechecked the Bioanalyzer results carefully and parts of them are shown as follows. Indeed, we found samples with low RIN values, but we eventually selected high-quality samples for the sequencing. We have included the summary report into the Supplementary Figure S1.</p> <p>In addition, still I seriously concern about molecular dating in Fig.5. Unfortunately, I could not find the figure the authors downloaded from the TIMETREE (<a href="http://www.timetree.org">www.timetree.org</a>). Thus, in order to retrieve Timetree, I searched term "Protostomia" in the website. According to the data (please see attached file "pairwise_divergence_times.xlsx"), divergent time of Insecta and Gastropoda is 753 MA, which is more or less similar to the value in Fig 5 (811.54 MA). Next, I downloaded the "Timetable", which is a list of literatures ("TimeTree The Timescale of Life.xlsx") referred by the TIMETREE. In the Timetable, however, 8 literatures out of 11 show the divergent time of insects/molluscs is 543-670 MA that is consistent with widely accepted dating (about 600 MA). Since calibration date considerably affects the result, researchers should access not only summary database but also original literatures cited by the database.</p> <p>Another issue of the molecular dating is that calibration using estimated value may cause overestimation or underestimation. The authors should use fossil record data for calibration. For examples, data referred in the following studies should provide reliable fossil information. These studies also show the divergent time of insects/molluscs is 600-650 MA.</p> <p>Erwin, D. H. et al. The Cambrian conundrum: early divergence and later ecological success in the early history of animals. <i>Science</i> 334, 1091-1097 (2011).<br/> Simakov, O. et al. Hemichordate genomes and deuterostome origins. <i>Nature</i> 527, 459-465 (2015).</p> <p>Reply: Thank you very much for your creative suggestions.<br/> In the last version, we estimated the divergence time among these species using the calibrations of Protostomia (642 - 864 MYA) and Mollusca (551 - 628 MYA), which were downloaded from <a href="http://www.timetree.org">www.timetree.org</a>.<br/> To follow your suggestion, we used two fossil calibrations, the maximum and minimum age of Bivalve/gastropod divergence (543 and 530 Mya), and the maximum age of Mollusk crown group divergence (549 Mya) to re-estimate the divergence time. As a</p> |

result, we obtained the divergence time of insects/mollusks as ~677 Mya, which was comparable with previous literatures. The results suggested that fossil records may be more rational than database summary for the divergence time estimation. Thank you very much again for the constructive suggestion.  
The corresponding contents have been upgraded in the revised ms.

Reviewer #2: Thanks to the authors for their responses to my comments. They have addressed the majority of my concerns, and I have only a few minor suggestions that might improve the ms before publication.

1.Contamination. It's good that the authors checked their raw data for contamination from non-target organisms prior to assembly. I think they should just briefly mention this fact in the main text of the manuscript, as it will increase confidence from colleagues that their data is of high quality.

Reply: Thank you very much for your suggestions.

The short description have been added in the revised version.(lines 154-156 in the revised ms)

2.Kmer spectra / heterozygosity. I think the authors may have tried to supply a supplementary figure here that was not attached to the revised PDF. In any case, I am content that their final assembly does not overly contain coassembled heterozygous regions. I have only a final minor comment: I would say that the kmer spectrum presented does in fact show some evidence for bimodality - look at the 'shoulder' around ~160X, at approximately 2 times the value of the main coverage peak. This is unlikely to be due to heterozygosity, as those regions would manifest as a peak around half the value of the main coverage peak - but it does suggest that there might be an excess of regions present as 2x duplications in the *A. fulica* genome. Something the authors may wish to investigate in the future!

Reply: Thank you very much for your suggestions.

The Kmer distribution figure have been changed into Supplementary Figure S2. Moreover, the 'shoulder' in the figure may denote the high repeat contents of the genome, and we discussed this in the ms.(lines 150-154)

Minor edits:

-Line 86: "chromosome-level genome"

Reply: Thank you very much and we've changed it into "chromosome-level genome".

-Line 86, 88, 91: typos with the name: *A. chatina*?

Reply: We are really very sorry for the mistake and have changed it into "*A. fulica*".

-Line 149: via kmer analysis, the genome is 2.12 Gb, but the final assembly size is considerably smaller (~1.85 Gb) - can the authors include a brief explanation for this difference?

Reply: The relatively large difference between the estimated and assembled versions may be resulted from the following 2 possible reasons: the high contents of repeats reside in the genome, and the probably larger size estimated from the Kmer analysis. We have added these reasons in the revised ms (lines168-171).

-Line 168: in my own experience, the major error mode with pacbio data is small (usually 1-bp) deletions at both homopolymers and heterozygous sites. If these deletions hit CDS, they can result in fragmented gene models and low-quality gene annotations. They may also influence SNP calling between samples. Since heterozygosity is low, this seems unlikely to be an issue in this case, and anyway should have been corrected by the Pilon polishing with the Illumina data (which do not suffer from such errors), but I encourage the authors to check the results of Pilon to check that indeed such errors are being corrected here.

Reply: Thank you very much for your suggestions.

We counted the corrected sites from the polish result and found the number of fixed SNPs and ambiguous bases were 718,733 and 3,117, respectively. A total of 4,663,931 small insertions totaling 6,129,524 bases and 634,193 small deletions

|                                                                                                                                                                                                                                                                                                                                                                                                                                                                                                                                     |                                                                                                                                                                                                                                                                                                         |
|-------------------------------------------------------------------------------------------------------------------------------------------------------------------------------------------------------------------------------------------------------------------------------------------------------------------------------------------------------------------------------------------------------------------------------------------------------------------------------------------------------------------------------------|---------------------------------------------------------------------------------------------------------------------------------------------------------------------------------------------------------------------------------------------------------------------------------------------------------|
|                                                                                                                                                                                                                                                                                                                                                                                                                                                                                                                                     | totaling 1,043,123 bases were also corrected. We found that more small insertions were corrected comparing to the small deletion, which was consistent with the result in previous study ( <a href="https://dx.doi.org/10.1186%2F1471-2164-13-375">https://dx.doi.org/10.1186%2F1471-2164-13-375</a> ). |
| <b>Additional Information:</b>                                                                                                                                                                                                                                                                                                                                                                                                                                                                                                      |                                                                                                                                                                                                                                                                                                         |
| <b>Question</b>                                                                                                                                                                                                                                                                                                                                                                                                                                                                                                                     | <b>Response</b>                                                                                                                                                                                                                                                                                         |
| Are you submitting this manuscript to a special series or article collection?                                                                                                                                                                                                                                                                                                                                                                                                                                                       | No                                                                                                                                                                                                                                                                                                      |
| <p><b>Experimental design and statistics</b></p> <p>Full details of the experimental design and statistical methods used should be given in the Methods section, as detailed in our <a href="#">Minimum Standards Reporting Checklist</a>. Information essential to interpreting the data presented should be made available in the figure legends.</p> <p>Have you included all the information requested in your manuscript?</p>                                                                                                  | Yes                                                                                                                                                                                                                                                                                                     |
| <p><b>Resources</b></p> <p>A description of all resources used, including antibodies, cell lines, animals and software tools, with enough information to allow them to be uniquely identified, should be included in the Methods section. Authors are strongly encouraged to cite <a href="#">Research Resource Identifiers</a> (RRIDs) for antibodies, model organisms and tools, where possible.</p> <p>Have you included the information requested as detailed in our <a href="#">Minimum Standards Reporting Checklist</a>?</p> | Yes                                                                                                                                                                                                                                                                                                     |
| <p><b>Availability of data and materials</b></p> <p>All datasets and code on which the conclusions of the paper rely must be either included in your submission or deposited in <a href="#">publicly available repositories</a> (where available and ethically appropriate), referencing such data using a unique identifier in the references and in</p>                                                                                                                                                                           | Yes                                                                                                                                                                                                                                                                                                     |

the “Availability of Data and Materials” section of your manuscript.

Have you have met the above requirement as detailed in our [Minimum Standards Reporting Checklist?](#)

[Click here to view linked References](#)

1 **A chromosomal-level genome assembly for the giant**  
2 **African snail *Achatina fulica***

3

4 Guo Yunhai<sup>1,2, #</sup>, Zhang Yi<sup>1,2, #</sup>, Liu Qin<sup>1,2</sup>, Huang Yun<sup>1,2</sup>, Mao Guangyao<sup>1,2</sup>,  
5 Yue Zhiyuan<sup>1,2</sup>, Eniola M. Abe<sup>1,2</sup>, Li Jian<sup>3</sup>, Wu Zhongdao<sup>4</sup>, Li Shizhu<sup>1,2</sup>, Zhou  
6 Xiaonong<sup>1,2</sup>, Hu Wei<sup>1,2,3,\*</sup>, Xiao Ning<sup>1,2,\*</sup>

7

8 <sup>1</sup>National Institute of Parasitic Diseases, Chinese Center for Disease Control and  
9 Prevention

10 <sup>2</sup>Key Laboratory of Parasite and Vector Biology, Ministry of Health, Shanghai, China

11 <sup>3</sup>Department of Microbiology and Microbial Engineering , School of Life Sciences , Fudan  
12 University , Shanghai 200438 , China

13 <sup>4</sup>Department of Parasitology, Zhongshan School of Medicine, Sun Yat-sen University,  
14 Guangzhou 510080, China

15

16

17

18

19

20

21

22

23

24

25

26 **Abstract**

27 **Background:**

28 *Achatina fulica* (*A. fulica*), also called the giant African snail, is the largest species in  
29 the reported terrestrial mollusks. Due to its voracious appetite, wide environmental  
30 adaptability, high growth rate and reproductive capacity, the species caused a  
31 world-wide invasion, mainly in Southeast Asia, Japan, the western Pacific islands and  
32 China. *A. fulica* is a pest that is able to damage agricultural crops, as well as an  
33 intermediate host of many parasites that can threaten human health. However,  
34 genomic information of *A. fulica* is still limited, hindering genetic and genomic studies  
35 with the aim to invasion control and management of the species.

36 **Finding:**

37 Using *K*mer-based method, we estimated the *A. fulica* genome size to be 2.12 Gb  
38 with a high repeat content up to 71%. About 101.6 Gb genomic long-read data of *A.*  
39 *fulica* were generated from the PacBio sequencing platform and assembled to the first  
40 *A. fulica* genome of 1.85 Gb with a contig N50 length of 726 kb. Using contact  
41 information from the Hi-C sequencing data, we successfully anchored 99.32% contig  
42 sequences into 31 chromosomes, leading to the final contig and scaffold N50 length  
43 of 721 kb and 59.6 Mb, respectively. The continuity, completeness and accuracy were  
44 evaluated by genome comparison with other mollusk genomes, BUSCO assessment  
45 and genomic read mapping. 23,726 protein-coding genes were predicted from the  
46 assembled genome, among which 96.34% of the genes were functionally annotated.  
47 The phylogenetic analysis using whole-genome protein-coding genes revealed that *A.*  
48 *fulica* separated from the common ancestor with *Biomphalaria glabrata* around 182  
49 million years ago.

50 **Conclusion:**

51 As our best knowledge, the *A. fulica* genome was the first terrestrial mollusk genome  
52 reported so far. The chromosome sequences of *A. fulica* will provide the research  
53 community a valuable resource for the population genetics and environmental  
54 adaptation studies for the species, and furthermore, for the chromosome level of  
55 evolution investigation within mollusks.

56

57

58 **Key Words:** Giant African snail, *Achatina fulica*, PacBio, Hi-C, chromosome  
59 assembly

## 60 **Data description**

## 61 **Introduction**

62 The giant African snail, *A. fulica*, is a Gastropod species (**Figure 1**). It is the largest  
63 terrestrial mollusks with voracious appetite, strong environmental adaptability, and  
64 high growth and reproduction rate[1-3]. Originating from East Africa, *A. fulica*  
65 gradually invaded Southeast Asia, Japan and the western Pacific islands in the last  
66 century[4-6] with the direct and indirect help from humans[7-9]. In mainland China, the  
67 first *A. fulica* invasion event was reported in 1931[10]. At present, the snail's natural  
68 distribution in the wild has been found in Guangdong, Hainan, Guangxi, southern  
69 parts of Yunnan Province and Fujian Province, and a county of Guizhou Province[11].  
70 *A. fulica* was included as the first 16 alien invasive species in China  
71 ([http://www.mee.gov.cn/gkml/zj/wj/200910/t20091022\\_172155.htm](http://www.mee.gov.cn/gkml/zj/wj/200910/t20091022_172155.htm), in Chinese) in  
72 2003, and was also listed by International Union for Conservation of Nature (IUCN) as  
73 the 100 most threatening alien invasive species[12]. This snail has been recognized  
74 as an agricultural and garden pest that has caused significant damages in both  
75 tropical and subtropical regions[9, 12, 13]. In addition, *A. fulica* is also the  
76 intermediate host of the parasitic nematode *Angiostrongyl cantonensis*. Human  
77 infection with angiostrongyliasis, which occurs mainly through consumption of snails  
78 carrying *A. cantonensis* larvae, causes eosinophilic meningoencephalitis[4, 11, 14-18].  
79 As a consequence, *A. fulica* is attracting more and more attention in fields of both  
80 agricultural crops protection and human disease control.

81 To date, a variety of mollusk genomes have been analyzed and published,  
82 including two freshwater gastropods snails *Pomacea canaliculata*[19] and  
83 *Biomphalaria glabrata*[20]. However, no genome has been reported for terrestrial  
84 mollusks. *A. fulica* is considered to be a destructive terrestrial gastropod which poses  
85 a significant hazard to agriculture, the environment, biodiversity and human health. A  
86 chromosome-level genome of *A. fulica* could provide crucial resources in the



87 population genetics and evolution studies based on genomic sequencing data aiming  
88 to discover the invasion and adaptation history of *A. fulica*. Meanwhile, the genome  
89 could also be used to probe gene expression during the important biological  
90 processes, such as gene expression patterns in various developmental stages and  
91 the interaction of *Angiostrongylus* and *A. fulica*. In this work, we applied Illumina,  
92 PacBio and Hi-C techniques to construct the chromosome of *A. fulica*. The genome is  
93 the first terrestrial mollusk genome, providing an important reference for the molecular  
94 mechanisms underlying its broad environmental adaptability and the development of  
95 control strategy of the world-wide invasion.

## 96 **Sample and sequencing**

97 An adult snail (**Figure 1**), which was collected in Pingxiang city, Guangxi Autonomous  
98 Region, was used for reference genome construction. The snail was dissected and  
99 abdominal foot (17.4 g) and liver pancreas (40.4 g) tissues were collected and quickly  
100 frozen in liquid nitrogen overnight before transferring to -80 °C for storage. DNA was  
101 extracted using the traditional phenol/chloroform extraction method and was quality  
102 checked using agarose gel electrophoresis, meeting the requirement for library  
103 construction for the Illumina X Ten (Illumina Inc., San Diego, CA, USA) and for the  
104 PacBio Sequel (Pacific Biosciences of California, Menlo Park, CA, USA) sequencing  
105 platforms.

106 RNA was extracted from the pallium, liver, foot, spleen, stomach, gut, heart using  
107 TRIZOL reagents. The RNA quality was checked using the Nanodrop ND-1000  
108 spectrophotometer (LabTech, USA) and 2100 Bioanalyzer (Agilent Technologies,  
109 USA) with RNA integrity number larger than 8 (Supplemental Figure S1). The RNA  
110 from each samples were equally mixed for the RNA sequencing on PacBio Sequel  
111 platform. Firstly, mRNA molecules were reversely transcribed to cDNA using Clontech  
112 SMARTer cDNA synthesis kit. After cDNA amplification and purification, two  
113 SMRTbell libraries of 0-4 kb and 4-10 kb were generated using the size selection in

114 BluePippin Size Selection System (Pacific Biosciences of California, Menlo Park, CA,  
115 USA) and protocols suggested by manufacturer. The finale libraries were sequenced  
116 in the PacBio SEQUEL platform (Pacific Biosciences of California, Menlo Park, CA,  
117 USA), resulting 12,439,996 subreads totaling about 22.5 Gb PacBio long reads with  
118 average length longer than 1,801 bps. Subsequently, a total of 782,613 circular  
119 consensus sequences (CCS) were generated based on the subreads, and a number  
120 of 553,889 Full-length Non-chimeric sequences (FLNC) representing 23,726 gene loci  
121 were obtained, eventually. All aforementioned data processing were performed using  
122 SMRT Link v5.0 ([www.pacb.com](http://www.pacb.com)). Moreover, about 70.37% of the multi-exon FLNCs  
123 were really full-length sequences embracing all the exons of the gene locus predicted  
124 from the whole genome sequences.

125 Using the DNA molecules from abdominal foot, a library with the insertion length  
126 of 300 bp were constructed and sequenced for Illumina sequencing platform  
127 according to the manufacturer's protocol. About 202.23 Gb short reads were obtained  
128 from the Illumina X Ten sequencing technology (**Table 1**), which was used for the  
129 following genome survey analysis, and for final base-level genome sequence  
130 correction. Meanwhile, four 20 kb libraries were constructed for PacBio Sequel  
131 sequencing. Using 16 sequencing SMRT cells, 104.6 Gb long reads were generated  
132 (**Table 1**). The mean and N50 lengths of the polymerases for sequencing cells ranged  
133 from 6.4 kb to 10.4 kb and from 12.3 kb to 20.3 kb for cells, respectively. Those long  
134 genomic DNA reads were used for reference genome construction.

135

### 136 **Genome features estimation from Kmer method**

137 With sequencing data from the Illumina platform, several genome characters could be  
138 evaluated for *A. fulica*. To ensure the quality of the analysis, ambiguous bases and  
139 low-quality reads were trimmed and filtered using the HTQC package (version  
140 1.92.3)[21]. The following quality control were performed under the framework of

141 HTQC. First, the quality of bases at two read ends were checked. Bases in sliding 5  
142 bp windows were deleted if the average quality of the window was below phred quality  
143 score of 20. Second, reads were filtered if the average phred quality score were  
144 smaller than 20 or the read length was shorter than 75 bp. Third, the mate reads were  
145 also removed if the corresponding reads were filtered.

146 The quality-controlled reads were used for genome character estimation. We  
147 calculated the number of each 17-mer from the sequencing data using the jellyfish  
148 software (version 2.0)[22], and the distribution was analyzed with GCE software  
149 (version 3)[23] and was shown in Supplemental Figure S2. We estimated the genome  
150 size of 2.12 Gb with the heterozygosity of 0.47% and repeat content of 71% in the  
151 genome. Previous studies revealed that repeat content varies in mollusks, and that  
152 repeat content is correlated with genome size[24]. The large genome size and high  
153 proportion of repeat contents of *A. fulica* provided additional supporting data for the  
154 statistical analysis. Moreover, 10,000 pairs of short reads were extracted randomly  
155 and were compared to the nt database and no obvious external contamination were  
156 found.

### 157 **Genome assembly by third-generation long reads**

158 After removing adaptor sequences in polymerases, 101.6 Gb subreads were  
159 generated for the following whole genome assembly. The average and N50 length of  
160 subreads reached 5.25 kb and 8.80 kb, respectively. To optimize the genome  
161 assembly using the PacBio sequencing data, we applied two packages in the  
162 assembly process, Canu v1.8 [25] and FALCON v0.2.2 [26]. Canu package was first  
163 applied for the assembly with the default parameters. As a result, a 1.93 Gb genome  
164 was constructed with 10,417 contigs and a contig N50 length of 662.40 kb. FALCON  
165 was also employed using the length\_cutoff and pr\_length\_cutoff parameters of 10 kb  
166 and 8 kb, respectively. We obtained 1.85 Gb genome with 8,585 contigs, with a contig  
167 N50 of 726.63 kb. We adopted the FALCON assembly as the reference genome for *A.*

168 *fulica* (**Table 2**). Compared to the estimated genome size, the assembled version was  
169 relatively smaller and may be resulted from the following two possible reasons: the  
170 high contents of repeats reside in the genome, and the probably larger size estimated  
171 from the Kmer analysis. The genome sequences were subsequently polished by  
172 PacBio long reads using arrow[27] and Illumina short reads by pilon[28] to correct  
173 base errors. The corrected genome was further applied for the following chromosome  
174 assembly construction using Hi-C data.

### 175 ***In situ* Hi-C library construction and chromosome assembly using Hi-C** 176 **data**

177 Liver pancreas tissue of *A. fulica* was used for library construction for Hi-C analysis  
178 and the library was constructed using the identical method in previous studies[29].  
179 Finally, the library was sequenced with 150 paired-end mode on the Illumina HiSeq X  
180 Ten platform (San Diego, CA, United States). From the Illumina sequencing platform,  
181 1,313.87 million paired-end reads were obtained for the Hi-C library (**Table 1**). The  
182 reads were mapped to the above *A. fulica* genome with Bowtie2 [30], with two ends of  
183 paired reads being mapped to the genome separately. To increase the interactive Hi-C  
184 reads ratio, an iterative mapping strategy was performed as previous studies, and  
185 only read pairs with both ends uniquely mapped were used for the following analysis.  
186 From the alignment status of two ends, self-ligation, non-ligation and other sorts of  
187 invalid reads, including StartNearRsite, PCR amplification, random break,  
188 LargeSmallFragments and ExtremeFragments, were filtered out by Hi-Clib[31].  
189 Through the recognition of restriction sites in sequences, contact counts among  
190 contigs were calculated and normalized.

191 According to previous karyotype analyses, *A. fulica* has 31 chromosomes[32]. By  
192 clustering the contigs using the contig contact frequency matrix, we were able to  
193 correct some minor errors in the FALCON assembly results. Contigs with errors were  
194 broken into shorter contigs. We obtained 8,701 contigs, slightly more than the 8,585

195 contigs in the FALCON assembly. We successfully clustered these contigs into 31  
196 groups in Lachesis[33] using the agglomerative hierarchical clustering method  
197 (**Figure 2**). Lachesis was further applied to order and orient the clustered contigs  
198 according to the contact matrix. As a result, 7,106 contigs were reliably anchored,  
199 ordered and orientated on chromosomes, accounting for 99.32% of the total genome  
200 bases. The first near chromosomal-level assembly of *A. fulica* was obtained with  
201 8,211 contigs, a contig N50 of 721.0 kb and a scaffold N50 of 59.59 Mb (**Table 2** and  
202 **Table 3**).

### 203 **Genome quality evaluation**

204 We assessed the quality of genome of *A. fulica* after the assembly process. The  
205 quality evaluation was carried out in three aspects: continuity, completeness and the  
206 mapping rate of NGS data.

207 First of all, we compared the sequence number and contig N50 length of *A. fulica*  
208 with public genome of mollusks and found that our assembly has a high quality on  
209 contig and scaffold N50 among mollusk genomes. (**Table 3**) Traditional chromosomal  
210 genome assembly requires physical maps and genetic maps, which is enormously  
211 time- and labor-consuming. With Hi-C data analysis, we successfully assembled *A.*  
212 *fulica* genome into near chromosome-level with just one individual.

213 Second, the assembled genome was subjected to the BUSCO (version 3.0,  
214 metazoa\_odb9)[34] to assess the completeness of the genome. About 91.7% of the  
215 BUSCO genes were identified in *A. fulica* genome, and more than 84.7% of the  
216 BUSCO genes were single-copy completed in our genome, illuminating a high level of  
217 completeness of the genome.

218 Third, NGS short reads were aligned to the genome using BWA package (version  
219 0.7.17)[35], and about 98.7% of paired reads were aligned to the genome, of which  
220 98.24% were reads paired aligned.

### 221 **Repeat element and gene annotation**

222 Tandem Repeat Finder4.09 (TRF)[36] was used for repetitive element identification in  
223 the *A. fulica* genome. A *de novo* method applying RepeatModeler was used to detect  
224 transposable elements (TEs). The resulted *de novo* data, combined with known  
225 repeat library from Repbase[37], were used to identify TEs in the *A. fulica* genome by  
226 RepeatMasker4-0-8 [38] software. All repetitive elements were masked in the genome  
227 before protein-coding gene prediction.

228 Protein-coding genes in the *A. fulica* genome were annotated using the *de novo*  
229 program Augustus0.2.1 [39]. Protein sequences of the closely related species  
230 including *Aplysia californica*, *Biomphalaria glabrata*, *Crassostrea gigas*, *Lottia*  
231 *gigantea* and *Patinopecten yessoensis*, were downloaded from the Ensembl  
232 database, and aligned to the *A. fulica* genome with TBLASTN2.6.0. Full-length  
233 transcripts obtained using Iso-Seq were mapped to the genome using Genewise[40].  
234 Finally, gene models predicted from all above methods were combined by  
235 MAKERV2.31.10 [41], resulting in 23,726 protein-coding genes. The gene number,  
236 gene length, CDS length, exon length and intron length distribution were all  
237 comparable with the related mollusks (**Figure 3**).

238 To functionally annotate protein-coding genes in the *A. fulica* genome, we  
239 searched all predicted gene sequences to NCBI non-redundant nucleotide (NT) and  
240 protein (NR), Swiss-Prot databases by BLASTN[42] and BLASTX[43] utility.  
241 Blast2GO[44] was also used to assign gene ontology (GO)[45] and Kyoto  
242 Encyclopedia of Genes and Genomes (KEGG)[46] pathways. A threshold of e-value  
243 of 1e-5 was used for all BLAST applications. Finally, 22,858 (96.34%) genes were  
244 functionally annotated (**Table 4**).

#### 245 **Phylogenetic analysis of *A. fulica* with other mollusks**

246 OrthoMCLv1.2 [47] was used to cluster gene families. First, proteins from *A. fulica*  
247 and the closely related mollusks, including *Aplysia californica*, *Biomphalaria glabrata*,  
248 *Crassostrea gigas*, *Lingula anatina*, *Lottia gigantea*, *Patinopecten yessoensis*,

249 *Octopus bimaculoides*, *Helobdella robusta*, *Pomacea canaliculata*, and the outgroup,  
250 *Drosophila melanogaster*, were all-to-all blasted by BLASTP[43] utility with an e-value  
251 threshold of 1e-5. Only proteins from the longest transcript were used for genes with  
252 alternative isoforms. We identified 25,448 gene families for *A. fulica* and the related  
253 species, among them 675 single-copy orthologs families were detected.

254 Using single-copy orthologs, we could probe the phylogenetic relationships for  
255 the *A. fulica* and other mollusks. To this end, protein sequences of single-copy genes  
256 were aligned using CLUSTALX2.0 [48]. Guided by the protein multi-sequence  
257 alignment, the alignment of the coding DNA sequences (CDS) for those genes were  
258 generated and concatenated for the following analysis. The phylogenetic relationships  
259 were constructed using PhyML3.0 [49] using the concatenated nucleotide alignment  
260 with the JTT+G+F model. The MCMCtree program in PAML4 [49] was used to  
261 estimate the species divergent time scales for the mollusks using approximate  
262 likelihood method and calibrated according to the fossil records. We found that *A.*  
263 *fulica* was most closely related to *Biomphalaria glabrata*, and the two species  
264 diverged from their common ancestor about 242 million years ago (MYA) (**Figure 4**).

## 265 **Conclusion**

266 We reconstructed the first chromosome level assembly for *A. fulica* using an  
267 integrated strategy of PacBio, Illumina and Hi-C technologies. Using the long reads  
268 from PacBio Sequel platform and short reads from the Illumina X Ten platform, we  
269 successfully constructed contig assembly for *A. fulica*. Leveraging contact information  
270 among contigs from Hi-C technology, we further improved the assembly to the near  
271 chromosome-level quality (**Table 3** and **Figure 2**). We predicted 23,726 protein-coding  
272 genes in the *A. fulica* genome and 22,858 of genes were functionally annotated with  
273 putative functions. With 675 single-copy orthologs from *A. fulica* and other related  
274 mollusks, we constructed the phylogenetic relationship of these mollusks, and found  
275 that *A. fulica* might have diverged from its common ancestor of *Biomphalaria glabrata*

276 around 177.1-187.1 MYA. Given the increasing interests in mollusk genomic evolution  
277 and the biological importance of *A. fulica* as an invasive animal, our genomic and  
278 transcriptome data provide valuable genetic resource for the following functional  
279 genomics investigations for the research community.

280

### 281 **Ethics Statement**

282 This study was approved by the Animal Care and Use committee of National Institute  
283 of Parasitic Diseases, Chinese Center for Disease Control and Prevention. All  
284 participants consent the study under the 'Ethics, consent and permissions' heading.  
285 All participants consent to publish the work under the 'Consent to publish' heading.

### 286 **Availability of supporting data**

287 The Illumina, PacBio and Hi-C sequencing data are available from NCBI via the  
288 accession number of SRR8369706, SRR8369311 and SRR8371669, respectively.  
289 The Illumina transcriptome sequencing data were deposited to NCBI via the  
290 accession number of SRR8371872 and SRR8371873. The genome, annotation and  
291 intermediate files were uploaded to GigaScience FTP server.

### 292 **Competing interests**

293 The authors declare that they have no competing interests.

### 294 **Acknowledgement**

295 This work was supported by the National Key Research and Development Program of  
296 China (No. 2016YFC1200500 and 2016YFC1202000). The authors thank Frasergen  
297 Bioinformatics for providing technique supports for this work.

### 298 **Author Contributions**

299 Z.X, H.W and X.N conceived the project. G.Y, Z.Y, L.Q collected the samples and  
300 extracted the genomic DNA. G.Y, Z.Y and L.Q performed the genome assembly and



301 data analysis. G.Y, Z.X, H.W and X.N wrote the paper.

## 302 **References**

- 303 1. Schreurs J. *Investigations on the biology, ecology and control of Giant African Snail 290 in*  
304 *West New Guinea.* 1963. Manokwari Agricultural Research Station.
- 305 2. Albuquerque FS, Peso-Aguiar MC and Assunção-Albuquerque MJ. Distribution,feeding  
306 behavior and control strategies of the exotic land snail *Achatinafulica*  
307 (*Gastropoda:Pulmonata*) in the Northeast of Brazil. *BrazJ Biol.* 2008;68:6.
- 308 3. Thiengo SC, Fernandez MA, Torres EJ, Coelho PM and Lanfredi RM. First record of anematode  
309 *Metastrongyloidea* (*Aelurostrongylus abstrusus* larvae) in *Achatina* (*Lissachatina*) *fulica*  
310 (*Mollusca,Achatinidae*) in Brazil. *J Invertebr Pathol.* 2008;98:6.
- 311 4. Lv S, Zhang Y and Liu HX. Invasive Snails and an Emerging Infectious Disease: Results from the  
312 First National Survey on *Angiostrongylus cantonensis* in China. *BioOne.* 2009;  
313 doi:10.1371/journal.pntd.0000368.
- 314 5. Cowie RH. *Non-indigenous land and freshwater molluscs in the islands of the Pacific:*  
315 *Conservation impacts and threats.* 2000.
- 316 6. Cowie RH. Can snails ever be effective and safe biocontrol agents? *Int J Pest Manage.*  
317 2001;47:18.
- 318 7. Cowie RH and Robinson DG. Pathways of introduction of nonindigenous land and freshwater  
319 snails and slugs. Washington DC: Island Press; 2003.
- 320 8. Kotangale JP. Giant African snail (*Achatina fulica* Bowdich). 2011;*J Environ Sci Eng* 53:6.
- 321 9. Raut SK and Barker GM. *Achatina fulica* Bowdich and Other *Achatinidae* as Pests in Tropical  
322 Agriculture. UK: CABI International; 2002.
- 323 10. Jarreit VHC. The spread of the snail *Achatina fulica* to south China. *Hong Kong Nat.* 1931;2:3.
- 324 11. Shan L, Yi Z and Peter S. Emerging *Angiostrongyliasis* in Mainland China. *Emerging Infectious*  
325 *Diseases.* 2008;14 1:4.
- 326 12. Lowe S, Browne SM, Boudjrlas S and De Poorter M. 100 of the world's worst invasive alien  
327 species: A selection from the global invasive species database. The Invasive Species  
328 Specialists Group of the Species Survival Commission of the World Conservation Union.  
329 Auckland: Hollands Printing; 2000.
- 330 13. Mead AR. *Pulmonates volume 2B. Economic malacology with particular reference to*  
331 *Achatina fulica.* London: Academic Press; 1979.
- 332 14. Alicata JE. The discovery of *Angiostrongylus cantonensis* as a cause of human eosinophilic  
333 meningitis. *Parasitol Today.* 1991;7 6:151-3.
- 334 15. Prociw P, Spratt DM and Carlisle MS. Neuro-angiostrongyliasis: unresolved issues. *Int J*  
335 *Parasitol.* 2000;30 12-13:1295-303.
- 336 16. Deng ZH, Zhang QM, Huang SY and Jones JL. First provincial survey of *Angiostrongylus*  
337 *cantonensis* in Guangdong Province, China. *Trop Med Int Health.* 2012;17:4.
- 338 17. Maldonado JA, Simoes RO, Oliveira AP, Motta EM, Fernandez MA, Pereira ZM, et al. First  
339 report of *Angiostrongylus cantonensis* (*Nematoda: Metastrongylidae*) in *Achatina fulica*  
340 (*Mollusca: Gastropoda*) from Southeast and South Brazil. *Mem Inst Oswaldo Cruz.*  
341 2010;105:4.
- 342 18. Vitta A, Polseela R, Nateeworanart S and Tattiyapong M. Survey of *Angiostrongylus*  
343 *cantonensis* in rats and giant African land snails in Phitsanulok Province, Thailand. *Asian Pac J*

- 344 Trop Med. 2011;4:3.
- 345 19. Liu C, Zhang Y, Ren Y, Wang H, Li S, Jiang F, et al. The genome of the golden apple snail  
346 *Pomacea canaliculata* provides insight into stress tolerance and invasive adaptation.  
347 *GigaScience*. 2018;7 9 doi:10.1093/gigascience/giy101.
- 348 20. Adema CM, Hillier LW, Jones CS, Loker ES, Knight M, Minx P, et al. Whole genome analysis of  
349 a schistosomiasis-transmitting freshwater snail. *Nature communications*. 2017;8:15451.  
350 doi:10.1038/ncomms15451.
- 351 21. Neff KL, Argue DP, Ma AC, Lee HB, Clark KJ and Ekker SC. Mojo Hand, a TALEN design tool for  
352 genome editing applications. *BMC Bioinformatics*. 2013;14:1. doi:10.1186/1471-2105-14-1.
- 353 22. Marçais G and Kingsford C. A fast, lock-free approach for efficient parallel counting of  
354 occurrences of k-mers. *Bioinformatics*. 2011;27 6:764-70.  
355 doi:10.1093/bioinformatics/btr011.
- 356 23. Binghang Liu YS, Jianying Yuan, Xuesong Hu, Hao Zhang, Nan Li, Zhenyu Li, Yanxiang  
357 Chen, Desheng Mu, Wei Fan. Estimation of genomic characteristics by analyzing k-mer  
358 frequency in de novo genome projects. *Quantitative Biology*. 2013;35:62-7.
- 359 24. Murgarella M, Puiu D, Novoa B, Figueras A, Posada D and Canchaya C. A First Insight into the  
360 Genome of the Filter-Feeder Mussel *Mytilus galloprovincialis*. *PLoS one*. 2016;11 3:e0151561.  
361 doi:10.1371/journal.pone.0151561.
- 362 25. Koren S, Walenz BP, Berlin K, Miller JR, Bergman NH and Phillippy AM. Canu: scalable and  
363 accurate long-read assembly via adaptive k-mer weighting and repeat separation. *Genome  
364 Res*. 2017;27 5:722-36. doi:10.1101/gr.215087.116.
- 365 26. Chin CS, Peluso P, Sedlazeck FJ, Nattestad M, Concepcion GT, Clum A, et al. Phased diploid  
366 genome assembly with single-molecule real-time sequencing. *Nat Methods*. 2016;13  
367 12:1050-4. doi:10.1038/nmeth.4035.
- 368 27. Chin C-S, Alexander DH, Marks P, Klammer AA, Drake J, Heiner C, et al. Nonhybrid, finished  
369 microbial genome assemblies from long-read SMRT sequencing data. *Nature methods*.  
370 2013;10 6:563.
- 371 28. Walker BJ, Abeel T, Shea T, Priest M, Abouelliel A, Sakthikumar S, et al. Pilon: an integrated  
372 tool for comprehensive microbial variant detection and genome assembly improvement.  
373 *PLoS one*. 2014;9 11:e112963.
- 374 29. Gong G, Dan C, Xiao S, Guo W, Huang P, Xiong Y, et al. Chromosomal-level assembly of yellow  
375 catfish genome using third-generation DNA sequencing and Hi-C analysis. *Gigascience*. 2018;  
376 doi:10.1093/gigascience/giy120.
- 377 30. Langmead B, Trapnell C, Pop M and Salzberg SL. Ultrafast and memory-efficient alignment of  
378 short DNA sequences to the human genome. *Genome Biol*. 2009;10 3:R25.  
379 doi:10.1186/gb-2009-10-3-r25.
- 380 31. Burton JN, Adey A, Patwardhan RP, Qiu R, Kitzman JO and Shendure J. Chromosome-scale  
381 scaffolding of de novo genome assemblies based on chromatin interactions. *Nature  
382 biotechnology*. 2013;31 12:1119.
- 383 32. Sun T. Chromosomal studies in three land snails. *Sinozoologia*. 1995;12:154-62.
- 384 33. Near TJ, Dornburg A, Eytan RI, Keck BP, Smith WL, Kuhn KL, et al. Phylogeny and tempo of  
385 diversification in the superradiation of spiny-rayed fishes. *Proceedings of the National  
386 Academy of Sciences of the United States of America*. 2013;110 31:12738.
- 387 34. Simão FA, Waterhouse RM, Ioannidis P, Kriventseva EV and Zdobnov EM. BUSCO: assessing

388 genome assembly and annotation completeness with single-copy orthologs. *Bioinformatics*.  
389 2015;31 19:3210-2.

390 35. Li H and Durbin R. Fast and accurate short read alignment with Burrows–Wheeler transform.  
391 *bioinformatics*. 2009;25 14:1754-60.

392 36. Benson G. Tandem repeats finder: a program to analyze DNA sequences. *Nucleic Acids Res*.  
393 1999;27 2:573-80.

394 37. Bao W, Kojima KK and Kohany O. Repbase Update, a database of repetitive elements in  
395 eukaryotic genomes. *Mob DNA*. 2015;6:11. doi:10.1186/s13100-015-0041-9.

396 38. Chen N. Using RepeatMasker to identify repetitive elements in genomic sequences. *Current*  
397 *protocols in bioinformatics*. 2004;5 1:4.10. 1-4.. 4.

398 39. Stanke M, Keller O, Gunduz I, Hayes A, Waack S and Morgenstern B. AUGUSTUS: ab initio  
399 prediction of alternative transcripts. *Nucleic acids research*. 2006;34 suppl\_2:W435-W9.

400 40. Birney E, Clamp M and Durbin R. GeneWise and genomewise. *Genome research*. 2004;14  
401 5:988-95.

402 41. Cantarel BL, Korf I, Robb SM, Parra G, Ross E, Moore B, et al. MAKER: an easy-to-use  
403 annotation pipeline designed for emerging model organism genomes. *Genome research*.  
404 2008;18 1:188-96.

405 42. Gertz EM, Yu YK, Agarwala R, Schaffer AA and Altschul SF. Composition-based statistics and  
406 translated nucleotide searches: improving the TBLASTN module of BLAST. *BMC Biol*.  
407 2006;4:41. doi:10.1186/1741-7007-4-41.

408 43. Camacho C, Coulouris G, Avagyan V, Ma N, Papadopoulos J, Bealer K, et al. BLAST+:  
409 architecture and applications. *BMC Bioinformatics*. 2009;10:421.  
410 doi:10.1186/1471-2105-10-421.

411 44. Conesa A, Götz S, García-Gómez JM, Terol J, Talón M and Robles M. Blast2GO: a universal  
412 tool for annotation, visualization and analysis in functional genomics research.  
413 *Bioinformatics*. 2005;21 18:3674-6.

414 45. Consortium GO. The Gene Ontology (GO) database and informatics resource. *Nucleic acids*  
415 *research*. 2004;32 suppl\_1:D258-D61.

416 46. Kanehisa M and Goto S. KEGG: kyoto encyclopedia of genes and genomes. *Nucleic acids*  
417 *research*. 2000;28 1:27-30.

418 47. Li L, Stoeckert CJ and Roos DS. OrthoMCL: identification of ortholog groups for eukaryotic  
419 genomes. *Genome research*. 2003;13 9:2178-89.

420 48. Thompson JD, Gibson TJ and Higgins DG. Multiple sequence alignment using ClustalW and  
421 ClustalX. *Current protocols in bioinformatics*. 2003; 1:2.3. 1-2.3. 22.

422 49. Guindon S, Lethiec F, Duroux P and Gascuel O. PHYML Online—a web server for fast  
423 maximum likelihood-based phylogenetic inference. *Nucleic acids research*. 2005;33  
424 suppl\_2:W557-W9.

425 50. Zhang G, Fang X, Guo X, Li L, Luo R, Xu F, et al. The oyster genome reveals stress adaptation  
426 and complexity of shell formation. *Nature*. 2012;490 7418:49-54. doi:10.1038/nature11413.

427 51. Takeuchi T, Kawashima T, Koyanagi R, Gyoja F, Tanaka M, Ikuta T, et al. Draft genome of the  
428 pearl oyster *Pinctada fucata*: a platform for understanding bivalve biology. *DNA research : an*  
429 *international journal for rapid publication of reports on genes and genomes*. 2012;19  
430 2:117-30. doi:10.1093/dnares/dss005.

431 52. Takeuchi T, Koyanagi R, Gyoja F, Kanda M, Hisata K, Fujie M, et al. Bivalve-specific gene

432 expansion in the pearl oyster genome: implications of adaptation to a sessile lifestyle.  
433 Zoological letters. 2016;2:3. doi:10.1186/s40851-016-0039-2.

434 53. Du X, Fan G, Jiao Y, Zhang H, Guo X, Huang R, et al. The pearl oyster *Pinctada fucata martensii*  
435 genome and multi-omic analyses provide insights into biomineralization. *GigaScience*. 2017;6  
436 8:1-12. doi:10.1093/gigascience/gix059.

437 54. Mun S, Kim YJ, Markkandan K, Shin W, Oh S, Woo J, et al. The Whole-Genome and  
438 Transcriptome of the Manila Clam (*Ruditapes philippinarum*). *Genome biology and evolution*.  
439 2017;9 6:1487-98. doi:10.1093/gbe/evx096.

440 55. Wang S, Zhang J, Jiao W, Li J, Xun X, Sun Y, et al. Scallop genome provides insights into  
441 evolution of bilaterian karyotype and development. *Nature ecology & evolution*. 2017;1  
442 5:120. doi:10.1038/s41559-017-0120.

443 56. Schell T, Feldmeyer B, Schmidt H, Greshake B, Tills O, Truebano M, et al. An annotated draft  
444 genome for *Radix auricularia* (Gastropoda, Mollusca). *Genome biology and evolution*. 2017;  
445 doi:10.1093/gbe/evx032.

446 57. Albertin CB, Simakov O, Mitros T, Wang ZY, Pungor JR, Edsinger-Gonzales E, et al. The  
447 octopus genome and the evolution of cephalopod neural and morphological novelties.  
448 *Nature*. 2015;524 7564:220-4. doi:10.1038/nature14668.

449 58. Simakov O, Marletaz F, Cho SJ, Edsinger-Gonzales E, Havlak P, Hellsten U, et al. Insights into  
450 bilaterian evolution from three spiralian genomes. *Nature*. 2013;493 7433:526-31.  
451 doi:10.1038/nature11696.

452 59. Kenny NJ, Namigai EK, Marletaz F, Hui JH and Shimeld SM. Draft genome assemblies and  
453 predicted microRNA complements of the intertidal lophotrochozoans *Patella vulgata*  
454 (Mollusca, Patellogastropoda) and *Spirobranchus* (*Pomatoceros*) *lamarcki* (Annelida,  
455 Serpulida). *Marine genomics*. 2015;24 Pt 2:139-46. doi:10.1016/j.margen.2015.07.004.

456 60. Barghi N, Concepcion GP, Olivera BM and Lluisma AO. Structural features of conopeptide  
457 genes inferred from partial sequences of the *Conus tribblei* genome. *Molecular genetics and*  
458 *genomics* : MGG. 2016;291 1:411-22. doi:10.1007/s00438-015-1119-2.

459 61. Uliano-Silva M, Dondero F, Dan Otto T, Costa I, Lima NCB, Americo JA, et al. A  
460 hybrid-hierarchical genome assembly strategy to sequence the invasive golden mussel,  
461 *Limnoperna fortunei*. *GigaScience*. 2018;7 2 doi:10.1093/gigascience/gix128.

462 62. Sun J, Zhang Y, Xu T, Zhang Y, Mu H, Zhang Y, et al. Adaptation to deep-sea chemosynthetic  
463 environments as revealed by mussel genomes. *Nature ecology & evolution*. 2017;1 5:121.  
464 doi:10.1038/s41559-017-0121.

465 63. Jiao W, Fu X, Dou J, Li H, Su H, Mao J, et al. High-resolution linkage and quantitative trait  
466 locus mapping aided by genome survey sequencing: building up an integrative genomic  
467 framework for a bivalve mollusc. *DNA research : an international journal for rapid publication*  
468 *of reports on genes and genomes*. 2014;21 1:85-101. doi:10.1093/dnares/dst043.

469 64. Luo YJ, Takeuchi T, Koyanagi R, Yamada L, Kanda M, Khalturina M, et al. The *Lingula* genome  
470 provides insights into brachiopod evolution and the origin of phosphate biomineralization.  
471 *Nature communications*. 2015;6:8301. doi:10.1038/ncomms9301.

472 65. Li C, Liu X, Liu B, Ma B, Liu F, Liu G, et al. Draft genome of the Peruvian scallop *Argopecten*  
473 *purpuratus*. *GigaScience*. 2018;7 4 doi:10.1093/gigascience/giy031.

474  
475

476

477 **Tables and Figures**478 **Table 1: Sequencing data generated for *A. fulica* genome assembly and annotation**

| Library type | Platform      | Library size (bp) | Data size (Gb) | Application                               |
|--------------|---------------|-------------------|----------------|-------------------------------------------|
| Short reads  | HiSeq X Ten   | 350               | 202.24         | Genome survey and genomic base correction |
| Long reads   | PacBio SEQUEL | 20,000            | 101.63         | Genome assembly                           |
| Hi-C         | HiSeq X Ten   | 300-500           | 199.73         | Chromosome construction                   |

479

480

481

482 **Table 2: Statistics for genome assembly of *A. fulica***

| Sample ID | Length        |               | Number   |          |
|-----------|---------------|---------------|----------|----------|
|           | Contig** (bp) | Scaffold (bp) | Contig** | Scaffold |
| Total     | 1,852,282,574 | 1,855,883,074 | 8,211    | 1,010    |
| Max       | 5,947,392     | 116,558,012   | -        | -        |
| N50       | 721,038       | 59,589,303    | 697      | 13       |
| N60       | 538,883       | 58,013,356    | 995      | 16       |
| N70       | 399,612       | 53,672,006    | 1,396    | 20       |
| N80       | 268,901       | 50,673,968    | 1,957    | 23       |
| N90       | 141,756       | 44,109,545    | 2,888    | 27       |

483 The two stars (\*\*) means the ultimate contigs since they were probably modified during  
 484 the Hic step.

485

486

487

488

489

490

491

492

493

494

495

496

497

498

499

500

501

502 Table 3 Summary of the genome of *A. fulica* and other published mollusk genomes.

| Species                               | Size* (Mb) | Contig N50(kb) | Scaffold N50(kb) |
|---------------------------------------|------------|----------------|------------------|
| <i>Achatina fulica</i> (this study)** | 2,120      | 721            | 59,590           |
| <i>Pomacea canaliculata</i> [19]**    | 570        | 995            | 38,000           |
| <i>Crassostrea gigas</i> [50]         | 545        | 7.5            | 401              |
| <i>Pinctada fucata</i> [51]           | 1,150      | 1.6            | 14.5             |
| <i>Pinctada fucata new</i> [52]       | 1,150      | 21             | 324              |
| <i>Pinctada fucata V2</i> [53]        | 1,150      | 21             | 167              |
| <i>Biomphalaria glabrata</i> [20]     | 931        | 7.3            | 48               |
| <i>Ruditapes philippinarum</i> [54]   | 1,370      | 3.3            | 32.7             |
| <i>Patinopecten yessoensis</i> [55]** | 1,430      | 38             | 41,000           |
| <i>Radix auricularia</i> [56]         | 1,600      | 0.324          | 578              |
| <i>Octopus bimaculoides</i> [57]      | 2,800      | 5.4            | 470              |
| <i>Mytilus galloprovincialis</i> [24] | 1,600      | 2.6            | 2.9              |
| <i>Lottia gigantea</i> [58]           | 420        | 96             | 1,870            |
| <i>Patella vulgata</i> [59]           | 1,460      | 3.1            | 3.1              |
| <i>Aplysia californica</i>            | 1,760      | 9.6            | 917              |
| <i>Conus tribblei</i> [60]            | 2,760      | 0.85           | 215              |
| <i>Limnoperna fortunei</i> [61]       | 1,600      | 10             | 312              |
| <i>Bathymodiolus platifrons</i> [62]  | 1,640      | 13.2           | 343              |
| <i>Modiolus philippinarum</i> [62]    | 2,380      | 19.7           | 100.2            |
| <i>Chlamys farreri</i> [63]           | 1,200      | 1.2            | 1.5              |
| <i>Lingula anatina</i> [64]           | 463        | 55             | 294              |
| <i>Argopecten purpuratus</i> [65]     | 885        | 80.1           | 1,020            |

503 \* Estimated size of the genome

504 \*\* Genomes assembled into near chromosomal level

505

506 **Table 4: Statistics for genome annotation of *A. fulica***

| Database  | Number | Percent |
|-----------|--------|---------|
| InterPro  | 16,252 | 68.50   |
| GO        | 12,101 | 51.00   |
| KEGG ALL  | 21,325 | 89.88   |
| KEGG KO   | 10,161 | 42.83   |
| Swissprot | 17,050 | 71.86   |
| TrEMBL    | 22,403 | 94.42   |
| NR        | 22,553 | 95.06   |
| Total     | 23,726 |         |

507

508

509

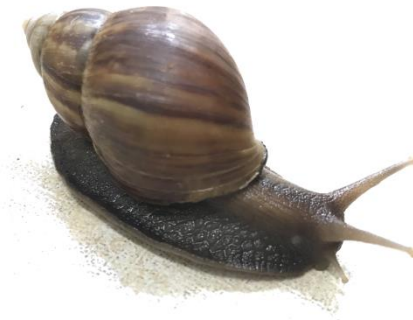

510

511 **Figure 1. *A. fulica* individual used for genome sequencing and assembly.**

512

513

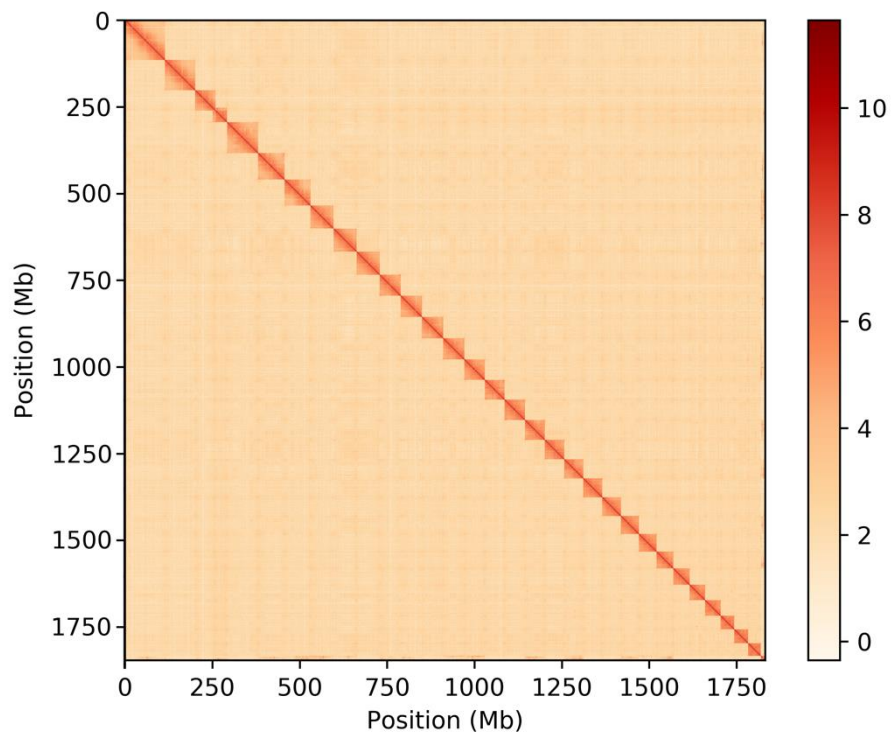

514

515 **Figure 2. Contact matrix generated from the Hi-C data analysis showing sequence**

516 **interactions in chromosomes.** The logarithm of the contact density were showed in the

517 color bar.

518

519

520

521

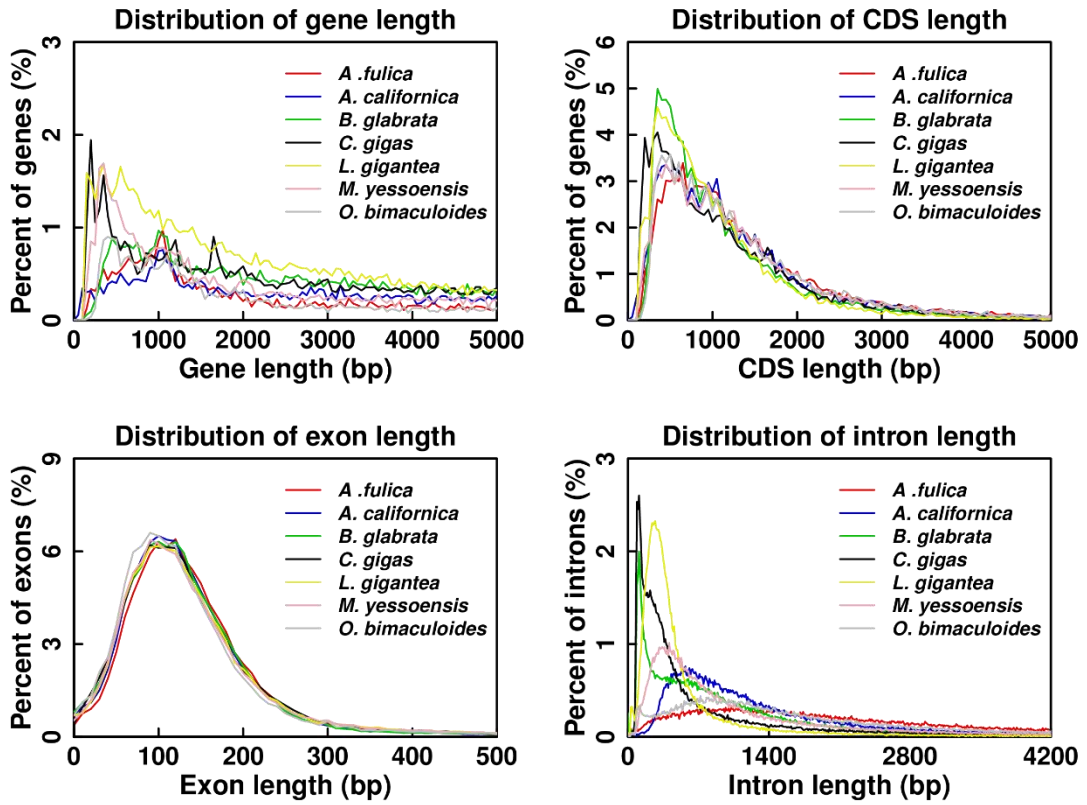

523

524

525 **Figure 3. Length distribution comparison on total gene, CDS, exon, and intron of**

526 **annotated gene models of *A. fulica* with other closely related insect species.**The

527 comparison of length distribution of genes (A), CDS (B), exon (C) and intron (D) for *A.*

528 *fulica* to those in *A.californica* , *B. glabrata* , *C. gigas* , *L. gigantea* , *P. yessoensis* and *O.*

529 *bimaculoides*.

530

531

532

533

534



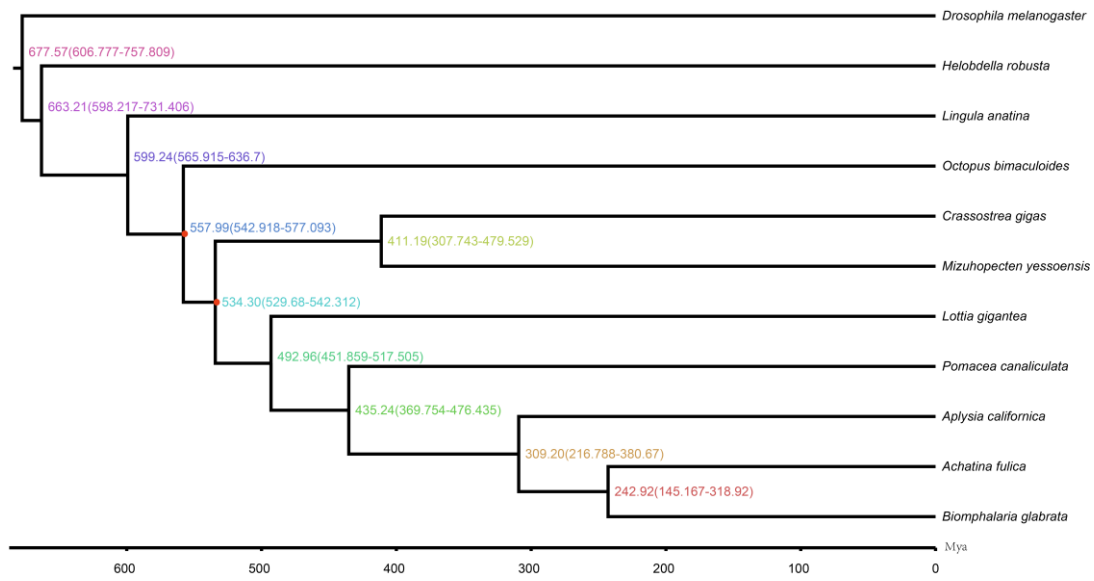

535

536 **Figure 4. Phylogenetic relationship between *A. fulica* and related species.**

537 The divergence time (million years ago, Mya) and the 95% confidential intervals are

538 labeled at branch sites and the red dots in the tree denotes the fossil recalibration sites

539 with the maximum and minimum age of Bivalve/gastropod divergence were 543 and 530

540 Mya, and the maximum age of Mollusk crown group divergence was 549 Mya.

541

542

543

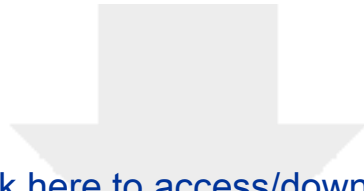

Click here to access/download  
**Supplementary Material**  
supplementary\_information.docx

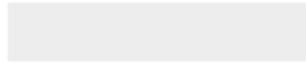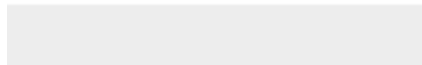

Supplement: giz124_giga-d-19-00006_revision_2.pdf [file giz124_giga-d-19-00006_revision_2.pdf]
