# Supplementary material for: A chromosomal-level genome assembly for the giant African snail Achatina fulica
Source: PubMed Central journal article supplement (PMC6802634; doi:10.1093/gigascience/giz124), 2019-10-21

## A chromosomal-level genome assembly for the giant African snail *Achatina fulica* --Manuscript Draft--

|                                                      |                                                                                                                                                                                                                                                                                                                                                                                                                                                                                                                                                                                                                                                                                                                                                                                                                                                                                                                                                                                                                                                                                                                                                                                                                                                                                                                                                                                                                                                                                                                                                                                                                                                                                                                                                                                                                                                                                                                                                                                                                                                                                                                                                                                                                                                     |              |
|------------------------------------------------------|-----------------------------------------------------------------------------------------------------------------------------------------------------------------------------------------------------------------------------------------------------------------------------------------------------------------------------------------------------------------------------------------------------------------------------------------------------------------------------------------------------------------------------------------------------------------------------------------------------------------------------------------------------------------------------------------------------------------------------------------------------------------------------------------------------------------------------------------------------------------------------------------------------------------------------------------------------------------------------------------------------------------------------------------------------------------------------------------------------------------------------------------------------------------------------------------------------------------------------------------------------------------------------------------------------------------------------------------------------------------------------------------------------------------------------------------------------------------------------------------------------------------------------------------------------------------------------------------------------------------------------------------------------------------------------------------------------------------------------------------------------------------------------------------------------------------------------------------------------------------------------------------------------------------------------------------------------------------------------------------------------------------------------------------------------------------------------------------------------------------------------------------------------------------------------------------------------------------------------------------------------|--------------|
| <b>Manuscript Number:</b>                            | GIGA-D-19-00006R3                                                                                                                                                                                                                                                                                                                                                                                                                                                                                                                                                                                                                                                                                                                                                                                                                                                                                                                                                                                                                                                                                                                                                                                                                                                                                                                                                                                                                                                                                                                                                                                                                                                                                                                                                                                                                                                                                                                                                                                                                                                                                                                                                                                                                                   |              |
| <b>Full Title:</b>                                   | A chromosomal-level genome assembly for the giant African snail <i>Achatina fulica</i>                                                                                                                                                                                                                                                                                                                                                                                                                                                                                                                                                                                                                                                                                                                                                                                                                                                                                                                                                                                                                                                                                                                                                                                                                                                                                                                                                                                                                                                                                                                                                                                                                                                                                                                                                                                                                                                                                                                                                                                                                                                                                                                                                              |              |
| <b>Article Type:</b>                                 | Data Note                                                                                                                                                                                                                                                                                                                                                                                                                                                                                                                                                                                                                                                                                                                                                                                                                                                                                                                                                                                                                                                                                                                                                                                                                                                                                                                                                                                                                                                                                                                                                                                                                                                                                                                                                                                                                                                                                                                                                                                                                                                                                                                                                                                                                                           |              |
| <b>Funding Information:</b>                          | This work was supported by the National Key Research and Development Program of China (No. 2016YFC1200500 and 2016YFC1202000)                                                                                                                                                                                                                                                                                                                                                                                                                                                                                                                                                                                                                                                                                                                                                                                                                                                                                                                                                                                                                                                                                                                                                                                                                                                                                                                                                                                                                                                                                                                                                                                                                                                                                                                                                                                                                                                                                                                                                                                                                                                                                                                       | Dr Ning Xiao |
| <b>Abstract:</b>                                     | <p><b>Background:</b><br/> <i>Achatina fulica</i> (<i>A. fulica</i>), also called the giant African snail, is the largest terrestrial mollusk species. Due to its voracious appetite, wide environmental adaptability, high growth rate and reproductive capacity, it has become an invasive species across the world, mainly in Southeast Asia, Japan, the western Pacific islands and China. <i>A. fulica</i> is a pest that is able to damage agricultural crops, as well as an intermediate host of many parasites that can threaten human health. However, genomic information of <i>A. fulica</i> is still limited, hindering genetic and genomic studies for invasion control and management of the species.</p> <p><b>Finding:</b><br/> Using a Kmer-based method, we estimated the <i>A. fulica</i> genome size to be 2.12 Gb with a high repeat content up to 71%. Roughly 101.6 Gb genomic long-read data of <i>A. fulica</i> were generated from the PacBio sequencing platform and assembled to produce a first <i>A. fulica</i> genome of 1.85 Gb with a contig N50 length of 726 kb. Using contact information from the Hi-C sequencing data, we successfully anchored 99.32% contig sequences into 31 chromosomes, leading to the final contig and scaffold N50 length of 721 kb and 59.6 Mb, respectively. The continuity, completeness and accuracy were evaluated by genome comparison with other mollusk genomes, BUSCO assessment and genomic read mapping. 23,726 protein-coding genes were predicted from the assembled genome, among which 96.34% of the genes were functionally annotated. The phylogenetic analysis using whole-genome protein-coding genes revealed that <i>A. fulica</i> separated from a common ancestor with <i>Biomphalaria glabrata</i> around 182 million years ago.</p> <p><b>Conclusion:</b><br/> To the best of our knowledge, the <i>A. fulica</i> genome is the first terrestrial mollusk genome published to date. The chromosome sequence of <i>A. fulica</i> will provide the research community with a valuable resource for population genetics and environmental adaptation studies for the species as well as investigations of the chromosome level of evolution within mollusks.</p> |              |
| <b>Corresponding Author:</b>                         | ning xiao<br><br>CHINA                                                                                                                                                                                                                                                                                                                                                                                                                                                                                                                                                                                                                                                                                                                                                                                                                                                                                                                                                                                                                                                                                                                                                                                                                                                                                                                                                                                                                                                                                                                                                                                                                                                                                                                                                                                                                                                                                                                                                                                                                                                                                                                                                                                                                              |              |
| <b>Corresponding Author Secondary Information:</b>   |                                                                                                                                                                                                                                                                                                                                                                                                                                                                                                                                                                                                                                                                                                                                                                                                                                                                                                                                                                                                                                                                                                                                                                                                                                                                                                                                                                                                                                                                                                                                                                                                                                                                                                                                                                                                                                                                                                                                                                                                                                                                                                                                                                                                                                                     |              |
| <b>Corresponding Author's Institution:</b>           |                                                                                                                                                                                                                                                                                                                                                                                                                                                                                                                                                                                                                                                                                                                                                                                                                                                                                                                                                                                                                                                                                                                                                                                                                                                                                                                                                                                                                                                                                                                                                                                                                                                                                                                                                                                                                                                                                                                                                                                                                                                                                                                                                                                                                                                     |              |
| <b>Corresponding Author's Secondary Institution:</b> |                                                                                                                                                                                                                                                                                                                                                                                                                                                                                                                                                                                                                                                                                                                                                                                                                                                                                                                                                                                                                                                                                                                                                                                                                                                                                                                                                                                                                                                                                                                                                                                                                                                                                                                                                                                                                                                                                                                                                                                                                                                                                                                                                                                                                                                     |              |
| <b>First Author:</b>                                 | Yunhai Guo                                                                                                                                                                                                                                                                                                                                                                                                                                                                                                                                                                                                                                                                                                                                                                                                                                                                                                                                                                                                                                                                                                                                                                                                                                                                                                                                                                                                                                                                                                                                                                                                                                                                                                                                                                                                                                                                                                                                                                                                                                                                                                                                                                                                                                          |              |
| <b>First Author Secondary Information:</b>           |                                                                                                                                                                                                                                                                                                                                                                                                                                                                                                                                                                                                                                                                                                                                                                                                                                                                                                                                                                                                                                                                                                                                                                                                                                                                                                                                                                                                                                                                                                                                                                                                                                                                                                                                                                                                                                                                                                                                                                                                                                                                                                                                                                                                                                                     |              |
| <b>Order of Authors:</b>                             | Yunhai Guo                                                                                                                                                                                                                                                                                                                                                                                                                                                                                                                                                                                                                                                                                                                                                                                                                                                                                                                                                                                                                                                                                                                                                                                                                                                                                                                                                                                                                                                                                                                                                                                                                                                                                                                                                                                                                                                                                                                                                                                                                                                                                                                                                                                                                                          |              |
|                                                      | Yi Zhang                                                                                                                                                                                                                                                                                                                                                                                                                                                                                                                                                                                                                                                                                                                                                                                                                                                                                                                                                                                                                                                                                                                                                                                                                                                                                                                                                                                                                                                                                                                                                                                                                                                                                                                                                                                                                                                                                                                                                                                                                                                                                                                                                                                                                                            |              |
|                                                      | Qin Liu                                                                                                                                                                                                                                                                                                                                                                                                                                                                                                                                                                                                                                                                                                                                                                                                                                                                                                                                                                                                                                                                                                                                                                                                                                                                                                                                                                                                                                                                                                                                                                                                                                                                                                                                                                                                                                                                                                                                                                                                                                                                                                                                                                                                                                             |              |
|                                                      | Yun Huang                                                                                                                                                                                                                                                                                                                                                                                                                                                                                                                                                                                                                                                                                                                                                                                                                                                                                                                                                                                                                                                                                                                                                                                                                                                                                                                                                                                                                                                                                                                                                                                                                                                                                                                                                                                                                                                                                                                                                                                                                                                                                                                                                                                                                                           |              |

|                                                                                                                                                                                                                                                                                                                                                                                   |                                                                                                                                                                                                                                                                                                                                                                                                                                                                                                                                                                                                                                                                                                                                                                                                                                                                                                                                 |
|-----------------------------------------------------------------------------------------------------------------------------------------------------------------------------------------------------------------------------------------------------------------------------------------------------------------------------------------------------------------------------------|---------------------------------------------------------------------------------------------------------------------------------------------------------------------------------------------------------------------------------------------------------------------------------------------------------------------------------------------------------------------------------------------------------------------------------------------------------------------------------------------------------------------------------------------------------------------------------------------------------------------------------------------------------------------------------------------------------------------------------------------------------------------------------------------------------------------------------------------------------------------------------------------------------------------------------|
|                                                                                                                                                                                                                                                                                                                                                                                   | Guangyao Mao                                                                                                                                                                                                                                                                                                                                                                                                                                                                                                                                                                                                                                                                                                                                                                                                                                                                                                                    |
|                                                                                                                                                                                                                                                                                                                                                                                   | Zhiyuan Yue                                                                                                                                                                                                                                                                                                                                                                                                                                                                                                                                                                                                                                                                                                                                                                                                                                                                                                                     |
|                                                                                                                                                                                                                                                                                                                                                                                   | Eniola M. Abe                                                                                                                                                                                                                                                                                                                                                                                                                                                                                                                                                                                                                                                                                                                                                                                                                                                                                                                   |
|                                                                                                                                                                                                                                                                                                                                                                                   | Jian Li                                                                                                                                                                                                                                                                                                                                                                                                                                                                                                                                                                                                                                                                                                                                                                                                                                                                                                                         |
|                                                                                                                                                                                                                                                                                                                                                                                   | Zhongdao Wu                                                                                                                                                                                                                                                                                                                                                                                                                                                                                                                                                                                                                                                                                                                                                                                                                                                                                                                     |
|                                                                                                                                                                                                                                                                                                                                                                                   | Shizhu Li                                                                                                                                                                                                                                                                                                                                                                                                                                                                                                                                                                                                                                                                                                                                                                                                                                                                                                                       |
|                                                                                                                                                                                                                                                                                                                                                                                   | Xiaonong Zhou                                                                                                                                                                                                                                                                                                                                                                                                                                                                                                                                                                                                                                                                                                                                                                                                                                                                                                                   |
|                                                                                                                                                                                                                                                                                                                                                                                   | Wei Hu                                                                                                                                                                                                                                                                                                                                                                                                                                                                                                                                                                                                                                                                                                                                                                                                                                                                                                                          |
|                                                                                                                                                                                                                                                                                                                                                                                   | Ning Xiao                                                                                                                                                                                                                                                                                                                                                                                                                                                                                                                                                                                                                                                                                                                                                                                                                                                                                                                       |
| <b>Order of Authors Secondary Information:</b>                                                                                                                                                                                                                                                                                                                                    |                                                                                                                                                                                                                                                                                                                                                                                                                                                                                                                                                                                                                                                                                                                                                                                                                                                                                                                                 |
| <b>Response to Reviewers:</b>                                                                                                                                                                                                                                                                                                                                                     | <p>Reviewer #1: Regarding RNA samples, the authors commented that "we eventually selected high-quality samples for the sequencing." and showed Bioanalyzer report of only four samples in the supplementary. In the revised manuscript, however, they described that "RNA was extracted from the pallium, liver, foot, spleen, stomach, gut, heart...". Which four samples or tissues were actually used for RNA extraction and sequencing?</p> <p>Reply: Thanks a lot for reminding. We have collected multi samples for pallium, liver, foot, spleen, stomach, gut and heart tissues. The qualities of RNA samples were summarized in the following table. We selected the high-quality samples highlighted by red for the PacBio library construction and sequencing in the Supplementary Table S1, covering all tissues that mentioned above. We have accordingly revised the manuscript and supplementary information.</p> |
| <b>Additional Information:</b>                                                                                                                                                                                                                                                                                                                                                    |                                                                                                                                                                                                                                                                                                                                                                                                                                                                                                                                                                                                                                                                                                                                                                                                                                                                                                                                 |
| <b>Question</b>                                                                                                                                                                                                                                                                                                                                                                   | <b>Response</b>                                                                                                                                                                                                                                                                                                                                                                                                                                                                                                                                                                                                                                                                                                                                                                                                                                                                                                                 |
| Are you submitting this manuscript to a special series or article collection?                                                                                                                                                                                                                                                                                                     | No                                                                                                                                                                                                                                                                                                                                                                                                                                                                                                                                                                                                                                                                                                                                                                                                                                                                                                                              |
| <b>Experimental design and statistics</b>                                                                                                                                                                                                                                                                                                                                         | Yes                                                                                                                                                                                                                                                                                                                                                                                                                                                                                                                                                                                                                                                                                                                                                                                                                                                                                                                             |
| <p>Full details of the experimental design and statistical methods used should be given in the Methods section, as detailed in our <a href="#">Minimum Standards Reporting Checklist</a>. Information essential to interpreting the data presented should be made available in the figure legends.</p> <p>Have you included all the information requested in your manuscript?</p> |                                                                                                                                                                                                                                                                                                                                                                                                                                                                                                                                                                                                                                                                                                                                                                                                                                                                                                                                 |
| <b>Resources</b>                                                                                                                                                                                                                                                                                                                                                                  | Yes                                                                                                                                                                                                                                                                                                                                                                                                                                                                                                                                                                                                                                                                                                                                                                                                                                                                                                                             |
| <p>A description of all resources used, including antibodies, cell lines, animals and software tools, with enough information to allow them to be uniquely identified, should be included in the</p>                                                                                                                                                                              |                                                                                                                                                                                                                                                                                                                                                                                                                                                                                                                                                                                                                                                                                                                                                                                                                                                                                                                                 |

|                                                                                                                                                                                                                                                                                                                                                                                                                                                                                                                                                         |            |
|---------------------------------------------------------------------------------------------------------------------------------------------------------------------------------------------------------------------------------------------------------------------------------------------------------------------------------------------------------------------------------------------------------------------------------------------------------------------------------------------------------------------------------------------------------|------------|
| <p>Methods section. Authors are strongly encouraged to cite <a href="#">Research Resource Identifiers</a> (RRIDs) for antibodies, model organisms and tools, where possible.</p> <p>Have you included the information requested as detailed in our <a href="#">Minimum Standards Reporting Checklist</a>?</p>                                                                                                                                                                                                                                           |            |
| <p><b>Availability of data and materials</b></p> <p>All datasets and code on which the conclusions of the paper rely must be either included in your submission or deposited in <a href="#">publicly available repositories</a> (where available and ethically appropriate), referencing such data using a unique identifier in the references and in the “Availability of Data and Materials” section of your manuscript.</p> <p>Have you have met the above requirement as detailed in our <a href="#">Minimum Standards Reporting Checklist</a>?</p> | <p>Yes</p> |

[Click here to view linked References](#)

1 **A chromosomal-level genome assembly for the giant**  
2 **African snail *Achatina fulica***

3

4 Guo Yunhai<sup>1,2, #</sup>, Zhang Yi<sup>1,2, #</sup>, Liu Qin<sup>1,2</sup>, Huang Yun<sup>1,2</sup>, Mao Guangyao<sup>1,2</sup>,  
5 Yue Zhiyuan<sup>1,2</sup>, Eniola M. Abe<sup>1,2</sup>, Li Jian<sup>3</sup>, Wu Zhongdao<sup>4</sup>, Li Shizhu<sup>1,2</sup>, Zhou  
6 Xiaonong<sup>1,2</sup>, Hu Wei<sup>1,2,3,\*</sup>, Xiao Ning<sup>1,2,\*</sup>

7

8 <sup>1</sup>National Institute of Parasitic Diseases, Chinese Center for Disease Control and  
9 Prevention

10 <sup>2</sup>Key Laboratory of Parasite and Vector Biology, Ministry of Health, Shanghai, China

11 <sup>3</sup>Department of Microbiology and Microbial Engineering , School of Life Sciences , Fudan  
12 University , Shanghai 200438 , China

13 <sup>4</sup>Department of Parasitology, Zhongshan School of Medicine, Sun Yat-sen University,  
14 Guangzhou 510080, China

15

16 ORCID:

17 Ning Xiao, 0000-0002-1361-7013

18 Eniola Abe: 0000-0002-9573-5506

19

20

21

22

23

24

25

26

27 **Abstract**

28 **Background:**

29 *Achatina fulica* (*A. fulica*), also called the giant African snail, is the largest terrestrial  
30 mollusk species. Due to its voracious appetite, wide environmental adaptability, high  
31 growth rate and reproductive capacity, it has become an invasive species across the  
32 world, mainly in Southeast Asia, Japan, the western Pacific islands and China. *A.*  
33 *fulica* is a pest that is able to damage agricultural crops, as well as an intermediate  
34 host of many parasites that can threaten human health. However, genomic  
35 information of *A. fulica* is still limited, hindering genetic and genomic studies for  
36 invasion control and management of the species.

37 **Finding:**

38 Using a *Kmer*-based method, we estimated the *A. fulica* genome size to be 2.12 Gb  
39 with a high repeat content up to 71%. Roughly 101.6 Gb genomic long-read data of *A.*  
40 *fulica* were generated from the PacBio sequencing platform and assembled to  
41 produce a first *A. fulica* genome of 1.85 Gb with a contig N50 length of 726 kb. Using  
42 contact information from the Hi-C sequencing data, we successfully anchored 99.32%  
43 contig sequences into 31 chromosomes, leading to the final contig and scaffold N50  
44 length of 721 kb and 59.6 Mb, respectively. The continuity, completeness and  
45 accuracy were evaluated by genome comparison with other mollusk genomes,  
46 BUSCO assessment and genomic read mapping. 23,726 protein-coding genes were  
47 predicted from the assembled genome, among which 96.34% of the genes were  
48 functionally annotated. The phylogenetic analysis using whole-genome protein-coding  
49 genes revealed that *A. fulica* separated from a common ancestor with *Biomphalaria*  
50 *glabrata* around 182 million years ago.

51 **Conclusion:**

52 To the best of our knowledge, the *A. fulica* genome is the first terrestrial mollusk  
53 genome published to date. The chromosome sequence of *A. fulica* will provide the  
54 research community with a valuable resource for population genetics and  
55 environmental adaptation studies for the species as well as investigations of the  
56 chromosome level of evolution within mollusks.

57

58

59 **Key Words:** Giant African snail, *Achatina fulica*, PacBio, Hi-C, chromosome  
60 assembly

## 61 **Data description**

## 62 **Introduction**

63 The giant African snail, *A. fulica* (NCBI: txid6530), is a Gastropod species (**Figure 1**).  
64 It is the largest terrestrial mollusk, with a voracious appetite, strong environmental  
65 adaptability, and high growth and reproduction rate[1-3]. Originating in East Africa, *A.*  
66 *fulica* over the last century it has gradually invaded Southeast Asia, Japan and the  
67 western Pacific islands [4-6] with the direct and indirect help from humans[7-9]. In  
68 mainland China, the first *A. fulica* invasion event was reported in 1931[10]. At present,  
69 the snail's natural distribution in the wild has been found in Guangdong, Hainan,  
70 Guangxi, southern parts of Yunnan Province and Fujian Province, and a county of  
71 Guizhou Province[11]. *A. fulica* was included as the first 16 alien invasive species in  
72 China ([http://www.mee.gov.cn/gkml/zi/wj/200910/t20091022\\_172155.htm](http://www.mee.gov.cn/gkml/zi/wj/200910/t20091022_172155.htm), in Chinese)  
73 in 2003, and was also listed by International Union for Conservation of Nature (IUCN)  
74 as among the 100 most threatening alien invasive species[12]. This snail has been  
75 recognized as an agricultural and garden pest causing significant damage in both  
76 tropical and subtropical regions[9, 12, 13]. In addition, *A. fulica* is also the  
77 intermediate host of the parasitic nematode *Angiostrongyl cantonensis*. Human  
78 infection with angiostrongyliasis, which occurs mainly through consumption of snails  
79 carrying *A. cantonensis* larvae, causes eosinophilic meningoencephalitis[4, 11, 14-18].  
80 As a consequence, *A. fulica* is attracting more and more attention in the fields of  
81 agricultural crops protection and human disease control.

82 To date, a variety of mollusk genomes have been analyzed and published,  
83 including two freshwater gastropods snails *Pomacea canaliculata*[19] and  
84 *Biomphalaria glabrata*[20]. However, no genome has been reported for terrestrial  
85 mollusks. *A. fulica* is considered to be a destructive terrestrial gastropod which poses  
86 a significant hazard to agriculture, the environment, biodiversity and human health. A  
87 chromosome-level genome of *A. fulica* could provide crucial resources in the

88 population genetics and evolution studies based on genomic sequencing data aiming  
89 to discover the invasion and adaptation history of *A. fulica*. Furthermore, the genome  
90 could also be used to probe gene expression during important biological processes,  
91 such as gene expression patterns in various developmental stages and the interaction  
92 of *Angiostrongylus* and *A. fulica*. In this study we applied Illumina, PacBio and Hi-C  
93 techniques to construct the chromosome of *A. fulica*. The genome is the first  
94 terrestrial mollusk genome, providing an important reference for the molecular  
95 mechanisms underlying its broad environmental adaptability and the development of  
96 control strategy of the world-wide invasion.

### 97 **Sample and sequencing**

98 An adult snail (**Figure 1**), which was collected in Pingxiang city, Guangxi Autonomous  
99 Region, was used for reference genome construction. The snail was dissected and  
100 abdominal foot (17.4 g) and liver pancreas (40.4 g) tissues were collected and quickly  
101 frozen in liquid nitrogen overnight before transferring to -80 °C for storage. DNA was  
102 extracted using the traditional phenol/chloroform extraction method and was quality  
103 checked using agarose gel electrophoresis, meeting the requirement for library  
104 construction for the Illumina X Ten (Illumina Inc., San Diego, CA, USA) and for the  
105 PacBio Sequel (Pacific Biosciences of California, Menlo Park, CA, USA) sequencing  
106 platforms.

107 RNA was extracted from the pallium, liver, foot, spleen, stomach, gut, heart using  
108 TRIzol® Reagent (Life Technologies, USA). The RNA quality was checked using the  
109 Nanodrop ND-1000 spectrophotometer (LabTech, USA) and 2100 Bioanalyzer  
110 (Agilent Technologies, USA) with RNA integrity number larger than 8 (Supplemental  
111 Table S1 and Supplemental Figure S1). The RNA from each samples were equally  
112 mixed for the RNA sequencing on PacBio Sequel platform. Firstly, mRNA molecules  
113 were reversely transcribed to cDNA using Clontech SMARTer cDNA synthesis kit.  
114 After cDNA amplification and purification, two SMRTbell libraries of 0-4 kb and 4-10

115 kb were generated using the size selection in BluePippin Size Selection System  
116 (Pacific Biosciences of California, Menlo Park, CA, USA) and protocols suggested by  
117 manufacturer. The finale libraries were sequenced in the PacBio SEQUEL platform  
118 (Pacific Biosciences of California, Menlo Park, CA, USA), resulting 12,439,996  
119 subreads totaling about 22.5 Gb PacBio long reads with average length longer than  
120 1,801 bps. Subsequently, a total of 782,613 circular consensus sequences (CCS)  
121 were generated based on the subreads, and a number of 553,889 Full-length  
122 Non-chimeric sequences (FLNC) representing 23,726 gene loci were obtained,  
123 eventually. All aforementioned data processing were performed using SMRT Link  
124 v5.0 ([www.pacb.com](http://www.pacb.com)). Moreover, about 70.37% of the multi-exon FLNCs were really  
125 full-length sequences embracing all the exons of the gene locus predicted from the  
126 whole genome sequences.

127 Using the DNA from the abdominal foot, a library with the insertion length of 300  
128 bp was constructed and sequenced using the Illumina sequencing platform according  
129 to the manufacturer's protocol. About 202.23 Gb short reads were obtained using  
130 Illumina X Ten sequencing technology (**Table 1**), which was used for the following  
131 genome survey analysis, and for final base-level genome sequence correction.  
132 Meanwhile, four 20 kb libraries were constructed for PacBio Sequel sequencing.  
133 Using 16 sequencing SMRT cells, 104.6 Gb long reads were generated (**Table 1**).  
134 The mean and N50 lengths of the polymerases for sequencing cells ranged from 6.4  
135 kb to 10.4 kb and from 12.3 kb to 20.3 kb for cells, respectively. Those long genomic  
136 DNA reads were then used for reference genome construction.

137

### 138 **Genome features estimation from Kmer method**

139 With sequencing data from the Illumina platform, several genome characters could be  
140 evaluated for *A. fulica*. To ensure the quality of the analysis, ambiguous bases and  
141 low-quality reads were trimmed and filtered using the HTQC package (version



142 1.92.3)[21]. The following quality control were performed under the framework of  
143 HTQC. First, the quality of bases at two read ends were checked. Bases in sliding 5  
144 bp windows were deleted if the average quality of the window was below phred quality  
145 score of 20. Second, reads were filtered if the average phred quality score were  
146 smaller than 20 or the read length was shorter than 75 bp. Third, the mate reads were  
147 also removed if the corresponding reads were filtered.

148 The quality-controlled reads were used for genome character estimation. We  
149 calculated the number of each 17-mer from the sequencing data using the jellyfish  
150 software (Jellyfish, RRID:SCR\_005491; version 2.0)[22], and the distribution was  
151 analyzed with GCE software (GCE, RRID:SCR\_017332; version 3)[23] and was  
152 shown in Supplemental Figure S2. We estimated the genome size of 2.12 Gb with the  
153 heterozygosity of 0.47% and repeat content of 71% in the genome. Previous studies  
154 revealed that repeat content varies in mollusks, and that repeat content is correlated  
155 with genome size[24]. The large genome size and high proportion of repeat contents  
156 of *A. fulica* provided additional supporting data for the statistical analysis. Moreover,  
157 10,000 pairs of short reads were extracted randomly and were compared to the nt  
158 database and no obvious external contamination were found.

### 159 **Genome assembly by third-generation long reads**

160 After removing adaptor sequences in polymerases, 101.6 Gb subreads were  
161 generated for the following whole genome assembly. The average and N50 length of  
162 subreads reached 5.25 kb and 8.80 kb, respectively. To optimize the genome  
163 assembly using the PacBio sequencing data, we applied two packages in the  
164 assembly process, Canu v1.8 (Canu, RRID:SCR\_015880) [25] and FALCON v0.2.2  
165 (Falcon, RRID:SCR\_016089) [26]. Canu package was first applied for the assembly  
166 using default parameters. As a result, a 1.93 Gb genome was constructed with 10,417  
167 contigs and a contig N50 length of 662.40 kb. FALCON was also employed using the  
168 length\_cutoff and pr\_length\_cutoff parameters of 10 kb and 8 kb, respectively. We

169 obtained 1.85 Gb genome with 8,585 contigs, with a contig N50 of 726.63 kb. We  
170 adopted the FALCON assembly as the reference genome for *A. fulica* (**Table 2**).  
171 Compared to the estimated genome size, the assembled version was relatively  
172 smaller, which may have resulted from the following two possible scenarios: the high  
173 repeat content of the genome, and the probably larger size estimated from the Kmer  
174 analysis. The genome sequences were subsequently polished, PacBio long reads  
175 utilizing arrow[27] and Illumina short reads using pilon[28] to correct base errors. The  
176 corrected genome was further applied for the following chromosome assembly  
177 construction using Hi-C data.

### 178 ***In situ* Hi-C library construction and chromosome assembly using Hi-C** 179 **data**

180 Liver pancreas tissue of *A. fulica* was used for library construction for Hi-C analysis  
181 and the library was constructed using the identical method in previous studies[29].  
182 Finally, the library was sequenced with 150 paired-end mode on the Illumina HiSeq X  
183 Ten platform (San Diego, CA, United States). From the Illumina sequencing platform,  
184 1,313.87 million paired-end reads were obtained for the Hi-C library (**Table 1**). The  
185 reads were mapped to the above *A. fulica* genome with Bowtie2 [30], with two ends of  
186 paired reads being mapped to the genome separately. To increase the interactive Hi-C  
187 reads ratio, an iterative mapping strategy was performed as previous studies, and  
188 only read pairs with both ends uniquely mapped were used for the following analysis.  
189 From the alignment status of two ends, self-ligation, non-ligation and other sorts of  
190 invalid reads, including StartNearRsite, PCR amplification, random break,  
191 LargeSmallFragments and ExtremeFragments, were filtered out by Hi-Clib[31].  
192 Through the recognition of restriction sites in sequences, contact counts among  
193 contigs were calculated and normalized.

194 According to previous karyotype analyses, *A. fulica* has 31 chromosomes[32]. By  
195 clustering the contigs using the contig contact frequency matrix, we were able to

196 correct some minor errors in the FALCON assembly results. Contigs with errors were  
197 broken into shorter contigs. We obtained 8,701 contigs, slightly more than the 8,585  
198 contigs in the FALCON assembly. We successfully clustered these contigs into 31  
199 groups in Lachesis[33] using the agglomerative hierarchical clustering method  
200 (**Figure 2**). Lachesis was further applied to order and orient the clustered contigs  
201 according to the contact matrix. As a result, 7,106 contigs were reliably anchored,  
202 ordered and orientated on chromosomes, accounting for 99.32% of the total genome  
203 bases. The first near chromosomal-level assembly of *A. fulica* was obtained with  
204 8,211 contigs, a contig N50 of 721.0 kb and a scaffold N50 of 59.59 Mb (**Table 2** and  
205 **Table 3**).

## 206 **Genome quality evaluation**

207 We assessed the quality of genome of *A. fulica* after the assembly process. The  
208 quality evaluation was carried out in three aspects: continuity, completeness and the  
209 mapping rate of NGS data.

210 First of all, we compared the sequence number and contig N50 length of *A. fulica*  
211 with public genome of mollusks and found that our assembly has a high quality on  
212 contig and scaffold N50 among mollusk genomes. (**Table 3**) Traditional chromosomal  
213 genome assembly requires physical maps and genetic maps, which is enormously  
214 time- and labor-consuming. With Hi-C data analysis, we successfully assembled *A.*  
215 *fulica* genome into near chromosome-level with just one individual.

216 Second, the assembled genome was subjected to the BUSCO (version 3.0,  
217 metazoa\_odb9)[34] to assess the completeness of the genome. About 91.7% of the  
218 BUSCO genes were identified in *A. fulica* genome, and more than 84.7% of the  
219 BUSCO genes were single-copy completed in our genome, illuminating a high level of  
220 completeness of the genome.

221 Third, NGS short reads were aligned to the genome using BWA package (BWA,  
222 RRID:SCR\_010910; version 0.7.17)[35], and about 98.7% of paired reads were  
223 aligned to the genome, of which 98.24% were reads paired aligned.

#### 224 **Repeat element and gene annotation**

225 Tandem Repeat Finder4.09 (TRF)[36] was used for repetitive element identification in  
226 the *A. fulica* genome. A *de novo* method applying RepeatModeler (RepeatModeler,  
227 RRID:SCR\_015027) was used to detect transposable elements (TEs). The resulted  
228 *de novo* data, combined with known repeat library from Repbase[37], were used to  
229 identify TEs in the *A. fulica* genome by RepeatMasker4-0-8 (RepeatMasker,  
230 RRID:SCR\_012954) [38] software. All repetitive elements were masked in the  
231 genome before protein-coding gene prediction.

232 Protein-coding genes in the *A. fulica* genome were annotated using the *de novo*  
233 program Augustus0.2.1 (Augustus, RRID:SCR\_008417) [39]. Protein sequences of  
234 the closely related species including *Aplysia californica*, *Biomphalaria glabrata*,  
235 *Crassostrea gigas*, *Lottia gigantea* and *Patinopecten yessoensis*, were downloaded  
236 from the Ensembl database, and aligned to the *A. fulica* genome with TBLASTN2.6.0  
237 (TBLASTN, RRID:SCR\_011822). Full-length transcripts obtained using Iso-Seq were  
238 mapped to the genome using Genewise (GeneWise, RRID:SCR\_015054) [40]. Finally,  
239 gene models predicted from all above methods were combined by MAKERV2.31.10  
240 (MAKER, RRID:SCR\_005309) [41], resulting in 23,726 protein-coding genes. The  
241 gene number, gene length, CDS length, exon length and intron length distribution  
242 were all comparable with the related mollusks (**Figure 3**).

243 To functionally annotate protein-coding genes in the *A. fulica* genome, we  
244 searched all predicted gene sequences to NCBI non-redundant nucleotide (NT) and  
245 protein (NR), Swiss-Prot databases by BLASTN (BLASTN, RRID:SCR\_001598) [42]  
246 and BLASTX (BLASTX, RRID:SCR\_001653) [43] utility. Blast2GO (Blast2GO,  
247 RRID:SCR\_005828) [44] was also used to assign gene ontology (GO)[45] and Kyoto

248 Encyclopedia of Genes and Genomes (KEGG)[46] pathways. A threshold of e-value  
249 of 1e-5 was used for all BLAST applications. Finally, 22,858 (96.34%) genes were  
250 functionally annotated (**Table 4**).

### 251 **Phylogenetic analysis of *A. fulica* with other mollusks**

252 OrthoMCLv1.2 [47] was used to cluster gene families. First, proteins from *A. fulica*  
253 and the closely related mollusks, including *Aplysia californica*, *Biomphalaria glabrata*,  
254 *Crassostrea gigas*, *Lingula anatina*, *Lottia gigantea*, *Patinopecten yessoensis*,  
255 *Octopus bimaculoides*, *Helobdella robusta*, *Pomacea canaliculata*, and the outgroup,  
256 *Drosophila melanogaster*, were all-to-all blasted by BLASTP (BLASTP,  
257 RRID:SCR\_001010) [43] utility with an e-value threshold of 1e-5. Only proteins from  
258 the longest transcript were used for genes with alternative isoforms. We identified  
259 25,448 gene families for *A. fulica* and the related species, among them 675  
260 single-copy orthologs families were detected.

261 Using single-copy orthologs, we could probe the phylogenetic relationships for  
262 the *A. fulica* and other mollusks. To this end, protein sequences of single-copy genes  
263 were aligned using CLUSTALX2.0 (Clustal X, RRID:SCR\_017055) [48]. Guided by  
264 the protein multi-sequence alignment, the alignment of the coding DNA sequences  
265 (CDS) for those genes were generated and concatenated for the following analysis.  
266 The phylogenetic relationships were constructed using PhyML3.0 (PhyML,  
267 RRID:SCR\_014629) [49] using the concatenated nucleotide alignment with the  
268 JTT+G+F model. The MCMCtree program in PAML4 [49] was used to estimate the  
269 species divergent time scales for the mollusks using approximate likelihood method  
270 and calibrated according to the fossil records. We found that *A. fulica* was most  
271 closely related to *Biomphalaria glabrata*, and the two species diverged from their  
272 common ancestor about 242 million years ago (MYA) (**Figure 4**).

### 273 **Conclusion**

274 We reconstructed the first chromosome level assembly for *A. fulica* using an

275 integrated sequencing strategy combining PacBio, Illumina and Hi-C technologies.  
276 Using the long reads from the PacBio Sequel platform and short reads from the  
277 Illumina X Ten platform, we successfully constructed contig assembly for *A. fulica*.  
278 Leveraging contact information among contigs from Hi-C technology, we further  
279 improved the assembly to near chromosome-level quality (**Table 3** and **Figure 2**). We  
280 predicted 23,726 protein-coding genes in the *A. fulica* genome and 22,858 of genes  
281 were functionally annotated with putative functions. With 675 single-copy orthologs  
282 from *A. fulica* and other related mollusks, we constructed the phylogenetic  
283 relationship of these mollusks, and found that *A. fulica* might have diverged from its  
284 common ancestor of *Biomphalaria glabrata* around 177.1-187.1 MYA. Given the  
285 increasing interest in mollusk genomic evolution and the biological importance of *A.*  
286 *fulica* as an invasive animal, our genomic and transcriptome data will provide valuable  
287 genetic resources for follow-on functional genomics investigations by the research  
288 community.

289

## 290 **Ethics Statement**

291 This study was approved by the Animal Care and Use committee of National Institute  
292 of Parasitic Diseases, Chinese Center for Disease Control and Prevention.

## 293 **Abbreviation**

294 CCS: circular consensus sequences; CDS: coding DNA sequences; FLNC:  
295 Full-length Non-chimeric sequences; GO: gene ontology; KEGG: Kyoto Encyclopedia  
296 of Genes and Genomes; MYA: million years ago; TE: transposable elements

## 297 **Availability of supporting data**

298 The Illumina, PacBio and Hi-C sequencing data are available from NCBI via the  
299 accession number of SRR8369706, SRR8369311 and SRR8371669, respectively.

300 The Illumina transcriptome sequencing data were deposited to NCBI via the

301 accession number of SRR8371872 and SRR8371873. The genome, annotation and  
302 intermediate files were uploaded to *GigaScience* GigaDB Database [66].

### 303 **Competing interests**

304 The authors declare that they have no competing interests.

### 305 **Acknowledgement**

306 This work was supported by the National Key Research and Development Program of  
307 China (No. 2016YFC1200500 and 2016YFC1202000). The authors thank FraserGen  
308 Bioinformatics for providing technique supports for this work.

### 309 **Author Contributions**

310 Z.X, H.W and X.N conceived the project. G.Y, Z.Y, L.Q collected the samples and  
311 extracted the genomic DNA. G.Y, Z.Y and L.Q performed the genome assembly and  
312 data analysis. G.Y, Z.X, H.W and X.N wrote the paper.

### 313 **References**

- 314 1. Schreurs J. *Investigations on the biology, ecology and control of Giant African Snail 290 in*  
315 *West New Guinea*. 1963. Manokwari Agricultural Research Station.
- 316 2. Albuquerque FS, Peso-Aguiar MC and Assunção-Albuquerque MJ. Distribution,feeding  
317 behavior and control strategies of the exotic land snail *Achatinafulica*  
318 (*Gastropoda:Pulmonata*) in the Northeast of Brazil. *BrazJBiol*. 2008;68:6.
- 319 3. Thiengo SC, Fernandez MA, Torres EJ, Coelho PM and Lanfredi RM. First record of nematode  
320 *Metastrongyloidea* (*Aelurostrongylus abstrusus* larvae) in *Achatina* (*Lissachatina*) *fulica*  
321 (*Mollusca,Achatinidae*) in Brazil. *J Invertebr Pathol*. 2008;98:6.
- 322 4. Lv S, Zhang Y and Liu HX. Invasive Snails and an Emerging Infectious Disease: Results from the  
323 First National Survey on *Angiostrongylus cantonensis* in China. *BioOne*. 2009;  
324 doi:10.1371/journal.pntd.0000368.
- 325 5. Cowie RH. *Non-indigenous land and freshwater molluscs in the islands of the Pacific:*  
326 *Conservation impacts and threats*. 2000.
- 327 6. Cowie RH. Can snails ever be effective and safe biocontrol agents? *Int J Pest Manage*.  
328 2001;47:18.
- 329 7. Cowie RH and Robinson DG. Pathways of introduction of nonindigenous land and freshwater  
330 snails and slugs. Washington DC: Island Press; 2003.
- 331 8. Kotangale JP. Giant African snail (*Achatina fulica* Bowdich). 2011;*J Environ Sci Eng* 53:6.
- 332 9. Raut SK and Barker GM. *Achatina fulica* Bowdich and Other *Achatinidae* as Pests in Tropical  
333 Agriculture. UK: CABI International; 2002.
- 334 10. Jarreit VHC. The spread of the snail *Achatina fulica* to south China. *Hong Kong Nat*. 1931;2:3.

- 335 11. Shan L, Yi Z and Peter S. Emerging Angiostrongyliasis in Mainland China. *Emerging Infectious*  
336 *Diseases*. 2008;14 1:4.
- 337 12. Lowe S, Browne SM, Boudjrlas S and De Poorter M. 100 of the world's worst invasive alien  
338 species: A selection from the global invasive species database. The Invasive Species  
339 Specialists Group of the Species Survival Commission of the World Conservation Union.  
340 Auckland: Hollands Printing; 2000.
- 341 13. Mead AR. Pulmonates volume 2B. Economic malacology with particular reference to  
342 *Achatina fulica*. London: Academic Press; 1979.
- 343 14. Alicata JE. The discovery of *Angiostrongylus cantonensis* as a cause of human eosinophilic  
344 meningitis. *Parasitol Today*. 1991;7 6:151-3.
- 345 15. Prociw P, Spratt DM and Carlisle MS. Neuro-angiostrongyliasis: unresolved issues. *Int J*  
346 *Parasitol*. 2000;30 12-13:1295-303.
- 347 16. Deng ZH, Zhang QM, Huang SY and Jones JL. First provincial survey of *Angiostrongylus*  
348 *cantonensis* in Guangdong Province, China. *Trop Med Int Health*. 2012;17:4.
- 349 17. Maldonado JA, Simoes RO, Oliveira AP, Motta EM, Fernandez MA, Pereira ZM, et al. First  
350 report of *Angiostrongylus cantonensis* (Nematoda: Metastrongylidae) in *Achatina fulica*  
351 (Mollusca: Gastropoda) from Southeast and South Brazil. *Mem Inst Oswaldo Cruz*.  
352 2010;105:4.
- 353 18. Vitta A, Polseela R, Nateeworanart S and Tattiyapong M. Survey of *Angiostrongylus*  
354 *cantonensis* in rats and giant African land snails in Phitsanulok Province, Thailand. *Asian Pac J*  
355 *Trop Med*. 2011;4:3.
- 356 19. Liu C, Zhang Y, Ren Y, Wang H, Li S, Jiang F, et al. The genome of the golden apple snail  
357 *Pomacea canaliculata* provides insight into stress tolerance and invasive adaptation.  
358 *GigaScience*. 2018;7 9 doi:10.1093/gigascience/giy101.
- 359 20. Adema CM, Hillier LW, Jones CS, Loker ES, Knight M, Minx P, et al. Whole genome analysis of  
360 a schistosomiasis-transmitting freshwater snail. *Nature communications*. 2017;8:15451.  
361 doi:10.1038/ncomms15451.
- 362 21. Neff KL, Argue DP, Ma AC, Lee HB, Clark KJ and Ekker SC. Mojo Hand, a TALEN design tool for  
363 genome editing applications. *BMC Bioinformatics*. 2013;14:1. doi:10.1186/1471-2105-14-1.
- 364 22. Marçais G and Kingsford C. A fast, lock-free approach for efficient parallel counting of  
365 occurrences of k-mers. *Bioinformatics*. 2011;27 6:764-70.  
366 doi:10.1093/bioinformatics/btr011.
- 367 23. Binghang Liu YS, Jianying Yuan, Xuesong Hu, Hao Zhang, Nan Li, Zhenyu Li, Yanxiang  
368 Chen, Desheng Mu, Wei Fan. Estimation of genomic characteristics by analyzing k-mer  
369 frequency in de novo genome projects. *Quantitative Biology*. 2013;35:62-7.
- 370 24. Murgarella M, Puiu D, Novoa B, Figueras A, Posada D and Canchaya C. A First Insight into the  
371 Genome of the Filter-Feeder Mussel *Mytilus galloprovincialis*. *PLoS one*. 2016;11 3:e0151561.  
372 doi:10.1371/journal.pone.0151561.
- 373 25. Koren S, Walenz BP, Berlin K, Miller JR, Bergman NH and Phillippy AM. Canu: scalable and  
374 accurate long-read assembly via adaptive k-mer weighting and repeat separation. *Genome*  
375 *Res*. 2017;27 5:722-36. doi:10.1101/gr.215087.116.
- 376 26. Chin CS, Peluso P, Sedlazeck FJ, Nattestad M, Concepcion GT, Clum A, et al. Phased diploid  
377 genome assembly with single-molecule real-time sequencing. *Nat Methods*. 2016;13  
378 12:1050-4. doi:10.1038/nmeth.4035.



- 379 27. Chin C-S, Alexander DH, Marks P, Klammer AA, Drake J, Heiner C, et al. Nonhybrid, finished  
380 microbial genome assemblies from long-read SMRT sequencing data. *Nature methods*.  
381 2013;10 6:563.
- 382 28. Walker BJ, Abeel T, Shea T, Priest M, Abouelliel A, Sakthikumar S, et al. Pilon: an integrated  
383 tool for comprehensive microbial variant detection and genome assembly improvement.  
384 *PloS one*. 2014;9 11:e112963.
- 385 29. Gong G, Dan C, Xiao S, Guo W, Huang P, Xiong Y, et al. Chromosomal-level assembly of yellow  
386 catfish genome using third-generation DNA sequencing and Hi-C analysis. *Gigascience*. 2018;  
387 doi:10.1093/gigascience/giy120.
- 388 30. Langmead B, Trapnell C, Pop M and Salzberg SL. Ultrafast and memory-efficient alignment of  
389 short DNA sequences to the human genome. *Genome Biol*. 2009;10 3:R25.  
390 doi:10.1186/gb-2009-10-3-r25.
- 391 31. Burton JN, Adey A, Patwardhan RP, Qiu R, Kitzman JO and Shendure J. Chromosome-scale  
392 scaffolding of de novo genome assemblies based on chromatin interactions. *Nature*  
393 *biotechnology*. 2013;31 12:1119.
- 394 32. Sun T. Chromosomal studies in three land snails. *Sinozoologia*. 1995;12:154-62.
- 395 33. Near TJ, Dornburg A, Eytan RI, Keck BP, Smith WL, Kuhn KL, et al. Phylogeny and tempo of  
396 diversification in the superradiation of spiny-rayed fishes. *Proceedings of the National*  
397 *Academy of Sciences of the United States of America*. 2013;110 31:12738.
- 398 34. Simão FA, Waterhouse RM, Ioannidis P, Kriventseva EV and Zdobnov EM. BUSCO: assessing  
399 genome assembly and annotation completeness with single-copy orthologs. *Bioinformatics*.  
400 2015;31 19:3210-2.
- 401 35. Li H and Durbin R. Fast and accurate short read alignment with Burrows–Wheeler transform.  
402 *bioinformatics*. 2009;25 14:1754-60.
- 403 36. Benson G. Tandem repeats finder: a program to analyze DNA sequences. *Nucleic Acids Res*.  
404 1999;27 2:573-80.
- 405 37. Bao W, Kojima KK and Kohany O. Repbase Update, a database of repetitive elements in  
406 eukaryotic genomes. *Mob DNA*. 2015;6:11. doi:10.1186/s13100-015-0041-9.
- 407 38. Chen N. Using RepeatMasker to identify repetitive elements in genomic sequences. *Current*  
408 *protocols in bioinformatics*. 2004;5 1:4.10. 1-4.. 4.
- 409 39. Stanke M, Keller O, Gunduz I, Hayes A, Waack S and Morgenstern B. AUGUSTUS: ab initio  
410 prediction of alternative transcripts. *Nucleic acids research*. 2006;34 suppl\_2:W435-W9.
- 411 40. Birney E, Clamp M and Durbin R. GeneWise and genomewise. *Genome research*. 2004;14  
412 5:988-95.
- 413 41. Cantarel BL, Korf I, Robb SM, Parra G, Ross E, Moore B, et al. MAKER: an easy-to-use  
414 annotation pipeline designed for emerging model organism genomes. *Genome research*.  
415 2008;18 1:188-96.
- 416 42. Gertz EM, Yu YK, Agarwala R, Schaffer AA and Altschul SF. Composition-based statistics and  
417 translated nucleotide searches: improving the TBLASTN module of BLAST. *BMC Biol*.  
418 2006;4:41. doi:10.1186/1741-7007-4-41.
- 419 43. Camacho C, Coulouris G, Avagyan V, Ma N, Papadopoulos J, Bealer K, et al. BLAST+:  
420 architecture and applications. *BMC Bioinformatics*. 2009;10:421.  
421 doi:10.1186/1471-2105-10-421.
- 422 44. Conesa A, Götz S, García-Gómez JM, Terol J, Talón M and Robles M. Blast2GO: a universal

423 tool for annotation, visualization and analysis in functional genomics research.  
424 Bioinformatics. 2005;21 18:3674-6.

425 45. Consortium GO. The Gene Ontology (GO) database and informatics resource. Nucleic acids  
426 research. 2004;32 suppl\_1:D258-D61.

427 46. Kanehisa M and Goto S. KEGG: kyoto encyclopedia of genes and genomes. Nucleic acids  
428 research. 2000;28 1:27-30.

429 47. Li L, Stoeckert CJ and Roos DS. OrthoMCL: identification of ortholog groups for eukaryotic  
430 genomes. Genome research. 2003;13 9:2178-89.

431 48. Thompson JD, Gibson TJ and Higgins DG. Multiple sequence alignment using ClustalW and  
432 ClustalX. Current protocols in bioinformatics. 2003; 1:2.3. 1-2.3. 22.

433 49. Guindon S, Lethiec F, Duroux P and Gascuel O. PHYML Online—a web server for fast  
434 maximum likelihood-based phylogenetic inference. Nucleic acids research. 2005;33  
435 suppl\_2:W557-W9.

436 50. Zhang G, Fang X, Guo X, Li L, Luo R, Xu F, et al. The oyster genome reveals stress adaptation  
437 and complexity of shell formation. Nature. 2012;490 7418:49-54. doi:10.1038/nature11413.

438 51. Takeuchi T, Kawashima T, Koyanagi R, Gyoja F, Tanaka M, Ikuta T, et al. Draft genome of the  
439 pearl oyster *Pinctada fucata*: a platform for understanding bivalve biology. DNA research : an  
440 international journal for rapid publication of reports on genes and genomes. 2012;19  
441 2:117-30. doi:10.1093/dnares/dss005.

442 52. Takeuchi T, Koyanagi R, Gyoja F, Kanda M, Hisata K, Fujie M, et al. Bivalve-specific gene  
443 expansion in the pearl oyster genome: implications of adaptation to a sessile lifestyle.  
444 Zoological letters. 2016;2:3. doi:10.1186/s40851-016-0039-2.

445 53. Du X, Fan G, Jiao Y, Zhang H, Guo X, Huang R, et al. The pearl oyster *Pinctada fucata*  
446 *martensii* genome and multi-omic analyses provide insights into biomineralization.  
447 GigaScience. 2017;6 8:1-12. doi:10.1093/gigascience/gix059.

448 54. Mun S, Kim YJ, Markkandan K, Shin W, Oh S, Woo J, et al. The Whole-Genome and  
449 Transcriptome of the Manila Clam (*Ruditapes philippinarum*). Genome biology and evolution.  
450 2017;9 6:1487-98. doi:10.1093/gbe/evx096.

451 55. Wang S, Zhang J, Jiao W, Li J, Xun X, Sun Y, et al. Scallop genome provides insights into  
452 evolution of bilaterian karyotype and development. Nature ecology & evolution. 2017;1  
453 5:120. doi:10.1038/s41559-017-0120.

454 56. Schell T, Feldmeyer B, Schmidt H, Greshake B, Tills O, Truebano M, et al. An annotated draft  
455 genome for *Radix auricularia* (Gastropoda, Mollusca). Genome biology and evolution. 2017;  
456 doi:10.1093/gbe/evx032.

457 57. Albertin CB, Simakov O, Mitros T, Wang ZY, Pungor JR, Edsinger-Gonzales E, et al. The  
458 octopus genome and the evolution of cephalopod neural and morphological novelties.  
459 Nature. 2015;524 7564:220-4. doi:10.1038/nature14668.

460 58. Simakov O, Marletaz F, Cho SJ, Edsinger-Gonzales E, Havlak P, Hellsten U, et al. Insights into  
461 bilaterian evolution from three spiralian genomes. Nature. 2013;493 7433:526-31.  
462 doi:10.1038/nature11696.

463 59. Kenny NJ, Namigai EK, Marletaz F, Hui JH and Shimeld SM. Draft genome assemblies and  
464 predicted microRNA complements of the intertidal lophotrochozoans *Patella vulgata*  
465 (Mollusca, Patellogastropoda) and *Spirobranchus* (Pomatoceros) *lamarcki* (Annelida,  
466 Serpulida). Marine genomics. 2015;24 Pt 2:139-46. doi:10.1016/j.margen.2015.07.004.

- 467 60. Barghi N, Concepcion GP, Olivera BM and Lluisma AO. Structural features of conopeptide  
468 genes inferred from partial sequences of the *Conus tribblei* genome. *Molecular genetics and*  
469 *genomics* : MGG. 2016;291 1:411-22. doi:10.1007/s00438-015-1119-2.
- 470 61. Uliano-Silva M, Dondero F, Dan Otto T, Costa I, Lima NCB, Americo JA, et al. A  
471 hybrid-hierarchical genome assembly strategy to sequence the invasive golden mussel,  
472 *Limnoperna fortunei*. *GigaScience*. 2018;7 2 doi:10.1093/gigascience/gix128.
- 473 62. Sun J, Zhang Y, Xu T, Zhang Y, Mu H, Zhang Y, et al. Adaptation to deep-sea chemosynthetic  
474 environments as revealed by mussel genomes. *Nature ecology & evolution*. 2017;1 5:121.  
475 doi:10.1038/s41559-017-0121.
- 476 63. Jiao W, Fu X, Dou J, Li H, Su H, Mao J, et al. High-resolution linkage and quantitative trait  
477 locus mapping aided by genome survey sequencing: building up an integrative genomic  
478 framework for a bivalve mollusc. *DNA research : an international journal for rapid publication*  
479 *of reports on genes and genomes*. 2014;21 1:85-101. doi:10.1093/dnares/dst043.
- 480 64. Luo YJ, Takeuchi T, Koyanagi R, Yamada L, Kanda M, Khalturina M, et al. The *Lingula* genome  
481 provides insights into brachiopod evolution and the origin of phosphate biomineralization.  
482 *Nature communications*. 2015;6:8301. doi:10.1038/ncomms9301.
- 483 65. Li C, Liu X, Liu B, Ma B, Liu F, Liu G, et al. Draft genome of the Peruvian scallop *Argopecten*  
484 *purpuratus*. *GigaScience*. 2018;7 4 doi:10.1093/gigascience/giy031.
- 485 66. Guo Y; Zhang Y; Liu Q; Huang Y; Mao G; Yue Z; Abe EM; Li J; Wu Z; Li S; Zhou X; Hu W; Xiao N  
486 (2019): Supporting data for "A chromosomal-level genome assembly for the giant African  
487 snail *Achatina fulica*" *GigaScience Database*. <http://dx.doi.org/10.5524/100647>  
488  
489

490

491 **Tables and Figures**492 **Table 1: Sequencing data generated for *A. fulica* genome assembly and annotation**

| Library type | Platform      | Library size (bp) | Data size (Gb) | Application                               |
|--------------|---------------|-------------------|----------------|-------------------------------------------|
| Short reads  | HiSeq X Ten   | 350               | 202.24         | Genome survey and genomic base correction |
| Long reads   | PacBio SEQUEL | 20,000            | 101.63         | Genome assembly                           |
| Hi-C         | HiSeq X Ten   | 300-500           | 199.73         | Chromosome construction                   |

493

494

495

496 **Table 2: Statistics for genome assembly of *A. fulica***

| Sample ID | Length        |               | Number   |          |
|-----------|---------------|---------------|----------|----------|
|           | Contig** (bp) | Scaffold (bp) | Contig** | Scaffold |
| Total     | 1,852,282,574 | 1,855,883,074 | 8,211    | 1,010    |
| Max       | 5,947,392     | 116,558,012   | -        | -        |
| N50       | 721,038       | 59,589,303    | 697      | 13       |
| N60       | 538,883       | 58,013,356    | 995      | 16       |
| N70       | 399,612       | 53,672,006    | 1,396    | 20       |
| N80       | 268,901       | 50,673,968    | 1,957    | 23       |
| N90       | 141,756       | 44,109,545    | 2,888    | 27       |

497 The two stars (\*\*) means the ultimate contigs since they were probably modified during  
 498 the Hic step.

499

500

501

502

503

504

505

506

507

508

509

510

511

512

513

514

515

516 Table 3 Summary of the genome of *A. fulica* and other published mollusk genomes.

| Species                               | Size* (Mb) | Contig N50(kb) | Scaffold N50(kb) |
|---------------------------------------|------------|----------------|------------------|
| <i>Achatina fulica</i> (this study)** | 2,120      | 721            | 59,590           |
| <i>Pomacea canaliculata</i> [19]**    | 570        | 995            | 38,000           |
| <i>Crassostrea gigas</i> [50]         | 545        | 7.5            | 401              |
| <i>Pinctada fucata</i> [51]           | 1,150      | 1.6            | 14.5             |
| <i>Pinctada fucata new</i> [52]       | 1,150      | 21             | 324              |
| <i>Pinctada fucata V2</i> [53]        | 1,150      | 21             | 167              |
| <i>Biomphalaria glabrata</i> [20]     | 931        | 7.3            | 48               |
| <i>Ruditapes philippinarum</i> [54]   | 1,370      | 3.3            | 32.7             |
| <i>Patinopecten yessoensis</i> [55]** | 1,430      | 38             | 41,000           |
| <i>Radix auricularia</i> [56]         | 1,600      | 0.324          | 578              |
| <i>Octopus bimaculoides</i> [57]      | 2,800      | 5.4            | 470              |
| <i>Mytilus galloprovincialis</i> [24] | 1,600      | 2.6            | 2.9              |
| <i>Lottia gigantea</i> [58]           | 420        | 96             | 1,870            |
| <i>Patella vulgata</i> [59]           | 1,460      | 3.1            | 3.1              |
| <i>Aplysia californica</i>            | 1,760      | 9.6            | 917              |
| <i>Conus tribblei</i> [60]            | 2,760      | 0.85           | 215              |
| <i>Limnoperna fortunei</i> [61]       | 1,600      | 10             | 312              |
| <i>Bathymodiolus platifrons</i> [62]  | 1,640      | 13.2           | 343              |
| <i>Modiolus philippinarum</i> [62]    | 2,380      | 19.7           | 100.2            |
| <i>Chlamys farreri</i> [63]           | 1,200      | 1.2            | 1.5              |
| <i>Lingula anatina</i> [64]           | 463        | 55             | 294              |
| <i>Argopecten purpuratus</i> [65]     | 885        | 80.1           | 1,020            |

517 \* Estimated size of the genome

518 \*\* Genomes assembled into near chromosomal level

519

520 **Table 4: Statistics for genome annotation of *A. fulica***

| Database  | Number | Percent |
|-----------|--------|---------|
| InterPro  | 16,252 | 68.50   |
| GO        | 12,101 | 51.00   |
| KEGG ALL  | 21,325 | 89.88   |
| KEGG KO   | 10,161 | 42.83   |
| Swissprot | 17,050 | 71.86   |
| TrEMBL    | 22,403 | 94.42   |
| NR        | 22,553 | 95.06   |
| Total     | 23,726 |         |

521

522

523

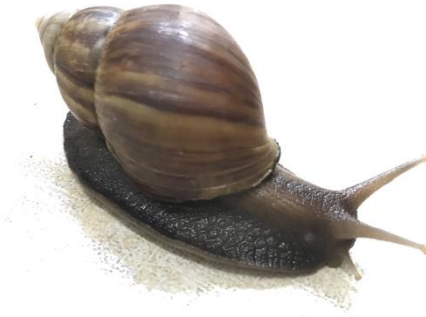

524

525 **Figure 1. *A. fulica* individual used for genome sequencing and assembly.**

526

527

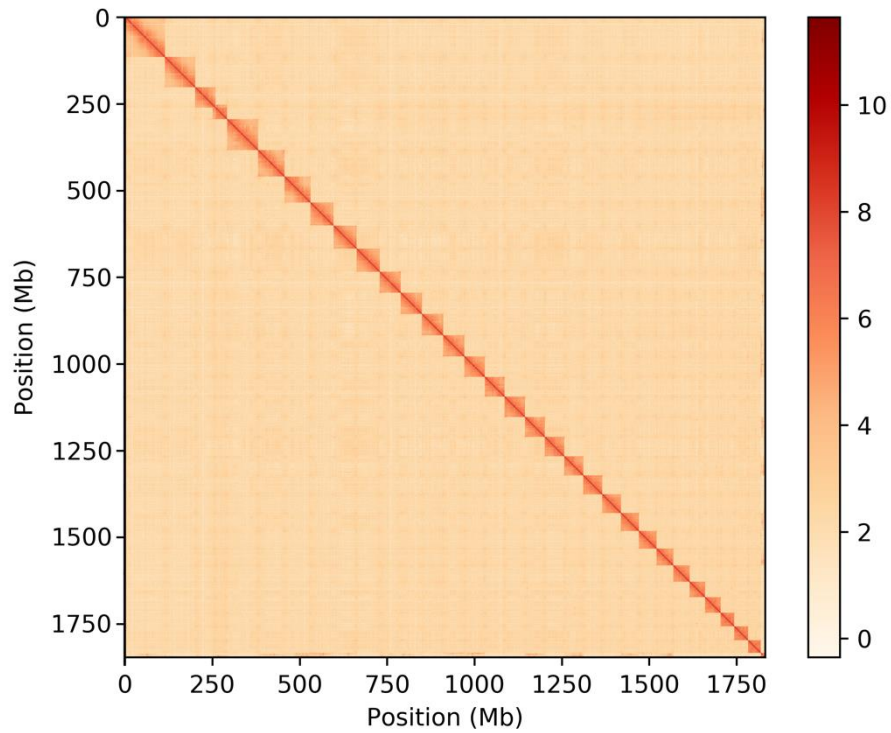

528

529 **Figure 2. Contact matrix generated from the Hi-C data analysis showing sequence**

530 **interactions in chromosomes.** The logarithm of the contact density were showed in the

531 color bar.

532

533

534

535

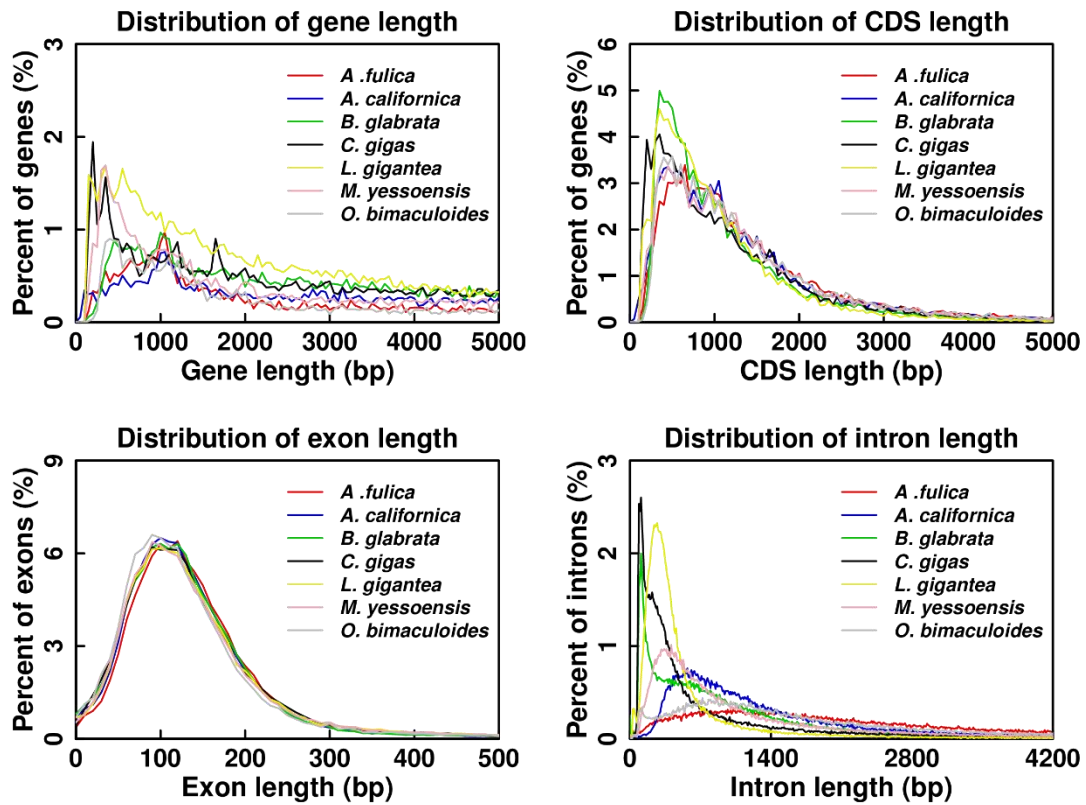

537

538

539 **Figure 3. Length distribution comparison on total gene, CDS, exon, and intron of**  
 540 **annotated gene models of *A. fulica* with other closely related insect species.**The  
 541 comparison of length distribution of genes (A), CDS (B), exon (C) and intron (D) for *A.*  
 542 *fulica* to those in *A. californica* , *B. glabrata* , *C. gigas* , *L. gigantea* , *P. yessoensis* and *O.*  
 543 *bimaculoides*.

544

545

546

547

548

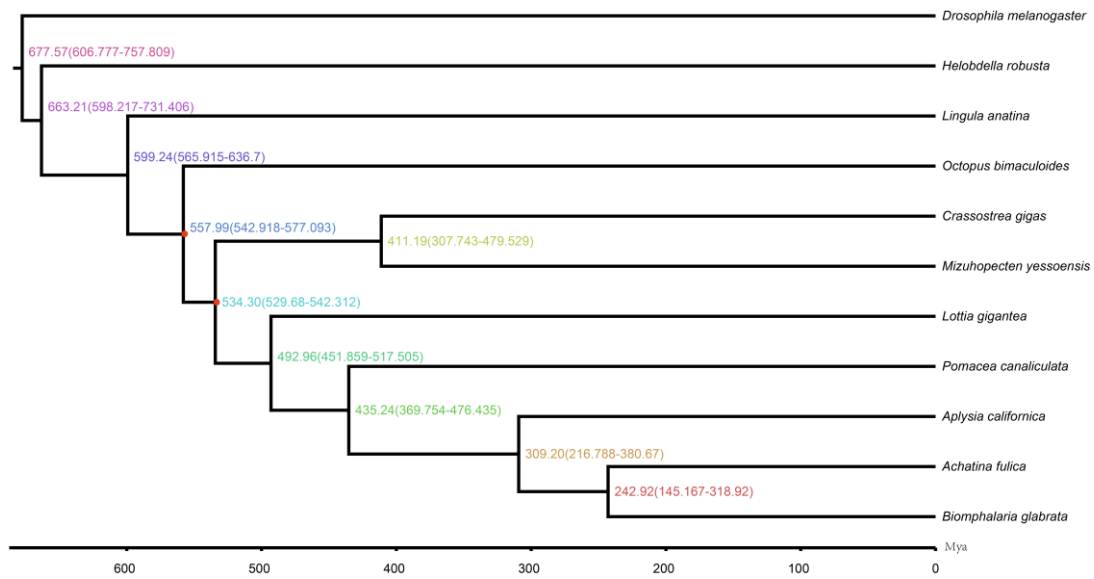

549

550 **Figure 4. Phylogenetic relationship between *A. fulica* and related species.**

551 The divergence time (million years ago, Mya) and the 95% confidential intervals are

552 labeled at branch sites and the red dots in the tree denotes the fossil recalibration sites

553 with the maximum and minimum age of Bivalve/gastropod divergence were 543 and 530

554 Mya, and the maximum age of Mollusk crown group divergence was 549 Mya.

555

556

557



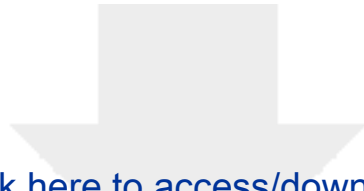

Click here to access/download  
**Supplementary Material**  
supplementary\_information.docx

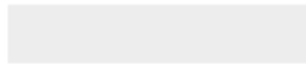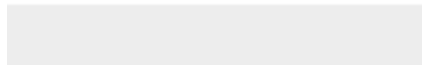

Supplement: giz124_giga-d-19-00006_revision_3.pdf [file giz124_giga-d-19-00006_revision_3.pdf]
