# Supplementary material for: A chromosomal-level genome assembly for the giant African snail Achatina fulica
Source: PubMed Central journal article supplement (PMC6802634; doi:10.1093/gigascience/giz124), 2019-10-21
Supplement: giz124_giga-d-19-00006_original_submission.pdf [file giz124_giga-d-19-00006_original_submission.pdf]

## A chromosomal-level genome assembly for the giant African snail *Achatina fulica* --Manuscript Draft--

|                                                      |                                                                                                                                                                                                                                                                                                                                                                                                                                                                                                                                                                                                                                                                                                                                                                                                                                                                                                                                                                                                                                                                                                                                                                                                                                                                                                                                                                                                                                                                                                                                                                                                                                                                                                                                                                                                                                                                                                                                                                                                                                                                                                                                                                                                                                                                                                                                                           |              |
|------------------------------------------------------|-----------------------------------------------------------------------------------------------------------------------------------------------------------------------------------------------------------------------------------------------------------------------------------------------------------------------------------------------------------------------------------------------------------------------------------------------------------------------------------------------------------------------------------------------------------------------------------------------------------------------------------------------------------------------------------------------------------------------------------------------------------------------------------------------------------------------------------------------------------------------------------------------------------------------------------------------------------------------------------------------------------------------------------------------------------------------------------------------------------------------------------------------------------------------------------------------------------------------------------------------------------------------------------------------------------------------------------------------------------------------------------------------------------------------------------------------------------------------------------------------------------------------------------------------------------------------------------------------------------------------------------------------------------------------------------------------------------------------------------------------------------------------------------------------------------------------------------------------------------------------------------------------------------------------------------------------------------------------------------------------------------------------------------------------------------------------------------------------------------------------------------------------------------------------------------------------------------------------------------------------------------------------------------------------------------------------------------------------------------|--------------|
| <b>Manuscript Number:</b>                            | GIGA-D-19-00006                                                                                                                                                                                                                                                                                                                                                                                                                                                                                                                                                                                                                                                                                                                                                                                                                                                                                                                                                                                                                                                                                                                                                                                                                                                                                                                                                                                                                                                                                                                                                                                                                                                                                                                                                                                                                                                                                                                                                                                                                                                                                                                                                                                                                                                                                                                                           |              |
| <b>Full Title:</b>                                   | A chromosomal-level genome assembly for the giant African snail <i>Achatina fulica</i>                                                                                                                                                                                                                                                                                                                                                                                                                                                                                                                                                                                                                                                                                                                                                                                                                                                                                                                                                                                                                                                                                                                                                                                                                                                                                                                                                                                                                                                                                                                                                                                                                                                                                                                                                                                                                                                                                                                                                                                                                                                                                                                                                                                                                                                                    |              |
| <b>Article Type:</b>                                 | Data Note                                                                                                                                                                                                                                                                                                                                                                                                                                                                                                                                                                                                                                                                                                                                                                                                                                                                                                                                                                                                                                                                                                                                                                                                                                                                                                                                                                                                                                                                                                                                                                                                                                                                                                                                                                                                                                                                                                                                                                                                                                                                                                                                                                                                                                                                                                                                                 |              |
| <b>Funding Information:</b>                          | This work was supported by the National Key Research and Development Program of China (No. 2016YFC1200500 and 2016YFC1202000)                                                                                                                                                                                                                                                                                                                                                                                                                                                                                                                                                                                                                                                                                                                                                                                                                                                                                                                                                                                                                                                                                                                                                                                                                                                                                                                                                                                                                                                                                                                                                                                                                                                                                                                                                                                                                                                                                                                                                                                                                                                                                                                                                                                                                             | Dr Ning Xiao |
| <b>Abstract:</b>                                     | <p><b>Background:</b><br/> <i>Achatina fulica</i> (<i>A. fulica</i>), also called giant African snail, is the largest species in the reported terrestrial mollusks. Due to its greedy appetite, wide environmental adaptability, high growth rate and reproduction capacity, the species caused world-wide invasion, mainly in Southeast Asia, Japan, the western Pacific islands and China. <i>A. fulica</i> is a pest to damage the agricultural crops, as well as an intermediate host of many parasites to threaten human health. However, genomic information of <i>A. fulica</i> is still limited, hindering the genetic and genomic studies with the aim to invasion control and management of the species.</p> <p><b>Finding:</b><br/> Using Kmer-based method, we estimated the <i>A. fulica</i> genome size of 2.12 Gb with a high repeat content up to 71%. About 101.6 Gb genomic long-read data of <i>A. fulica</i> were generated from the PacBio sequencing platform and assembled to the first <i>A. fulica</i> genome of 1.85 Gb with a contig N50 length of 726 kb. Using contact information from the Hi-C sequencing data, we successfully anchored 99.32% contig sequences into 31 chromosomes, leading to the final contig and scaffold N50 length of 721 kb and 59.6 Mb, respectively. The continuity, completeness and accuracy were evaluated by genome comparison with other mollusk genomes, BUSCO assessment and genomic read mapping. 23,726 protein-coding genes were predicted from the assembled genome, among which 96.34% of the genes were functionally annotated. The phylogenetic analysis using whole-genome protein-coding genes revealed that <i>A. fulica</i> separated from the common ancestor with <i>Biomphalaria glabrata</i> around 182 million years ago.</p> <p><b>Conclusion:</b><br/> As our best knowledge, the <i>A. fulica</i> genome was the first terrestrial mollusk genome reported so far. The chromosome sequences of <i>A. fulica</i> will not only provided the research community valuable genome resource for the population genetics and environmental adaptation studies for the species, as well as, for the chromosome level evolution investigation with other mollusks.</p> <p><b>Key Words:</b> Giant African snail, <i>Achatina fulica</i>, PacBio, Hi-C, chromosome assembly</p> |              |
| <b>Corresponding Author:</b>                         | ning xiao<br><br>CHINA                                                                                                                                                                                                                                                                                                                                                                                                                                                                                                                                                                                                                                                                                                                                                                                                                                                                                                                                                                                                                                                                                                                                                                                                                                                                                                                                                                                                                                                                                                                                                                                                                                                                                                                                                                                                                                                                                                                                                                                                                                                                                                                                                                                                                                                                                                                                    |              |
| <b>Corresponding Author Secondary Information:</b>   |                                                                                                                                                                                                                                                                                                                                                                                                                                                                                                                                                                                                                                                                                                                                                                                                                                                                                                                                                                                                                                                                                                                                                                                                                                                                                                                                                                                                                                                                                                                                                                                                                                                                                                                                                                                                                                                                                                                                                                                                                                                                                                                                                                                                                                                                                                                                                           |              |
| <b>Corresponding Author's Institution:</b>           |                                                                                                                                                                                                                                                                                                                                                                                                                                                                                                                                                                                                                                                                                                                                                                                                                                                                                                                                                                                                                                                                                                                                                                                                                                                                                                                                                                                                                                                                                                                                                                                                                                                                                                                                                                                                                                                                                                                                                                                                                                                                                                                                                                                                                                                                                                                                                           |              |
| <b>Corresponding Author's Secondary Institution:</b> |                                                                                                                                                                                                                                                                                                                                                                                                                                                                                                                                                                                                                                                                                                                                                                                                                                                                                                                                                                                                                                                                                                                                                                                                                                                                                                                                                                                                                                                                                                                                                                                                                                                                                                                                                                                                                                                                                                                                                                                                                                                                                                                                                                                                                                                                                                                                                           |              |
| <b>First Author:</b>                                 | Yunhai Guo                                                                                                                                                                                                                                                                                                                                                                                                                                                                                                                                                                                                                                                                                                                                                                                                                                                                                                                                                                                                                                                                                                                                                                                                                                                                                                                                                                                                                                                                                                                                                                                                                                                                                                                                                                                                                                                                                                                                                                                                                                                                                                                                                                                                                                                                                                                                                |              |
| <b>First Author Secondary Information:</b>           |                                                                                                                                                                                                                                                                                                                                                                                                                                                                                                                                                                                                                                                                                                                                                                                                                                                                                                                                                                                                                                                                                                                                                                                                                                                                                                                                                                                                                                                                                                                                                                                                                                                                                                                                                                                                                                                                                                                                                                                                                                                                                                                                                                                                                                                                                                                                                           |              |
| <b>Order of Authors:</b>                             | Yunhai Guo                                                                                                                                                                                                                                                                                                                                                                                                                                                                                                                                                                                                                                                                                                                                                                                                                                                                                                                                                                                                                                                                                                                                                                                                                                                                                                                                                                                                                                                                                                                                                                                                                                                                                                                                                                                                                                                                                                                                                                                                                                                                                                                                                                                                                                                                                                                                                |              |

|                                                                                                                                                                                                                                                                                                                                                                                                                              |                 |
|------------------------------------------------------------------------------------------------------------------------------------------------------------------------------------------------------------------------------------------------------------------------------------------------------------------------------------------------------------------------------------------------------------------------------|-----------------|
|                                                                                                                                                                                                                                                                                                                                                                                                                              | Yi Zhang        |
|                                                                                                                                                                                                                                                                                                                                                                                                                              | Qin Liu         |
|                                                                                                                                                                                                                                                                                                                                                                                                                              | Yun Huang       |
|                                                                                                                                                                                                                                                                                                                                                                                                                              | Guangyao Mao    |
|                                                                                                                                                                                                                                                                                                                                                                                                                              | Zhiyuan Yue     |
|                                                                                                                                                                                                                                                                                                                                                                                                                              | Eniola M. Abe   |
|                                                                                                                                                                                                                                                                                                                                                                                                                              | Jian Li         |
|                                                                                                                                                                                                                                                                                                                                                                                                                              | Zhongdao Wu     |
|                                                                                                                                                                                                                                                                                                                                                                                                                              | Shizhu Li       |
|                                                                                                                                                                                                                                                                                                                                                                                                                              | Xiaonong Zhou   |
|                                                                                                                                                                                                                                                                                                                                                                                                                              | Wei Hu          |
|                                                                                                                                                                                                                                                                                                                                                                                                                              | Ning Xiao       |
| <b>Order of Authors Secondary Information:</b>                                                                                                                                                                                                                                                                                                                                                                               |                 |
| <b>Additional Information:</b>                                                                                                                                                                                                                                                                                                                                                                                               |                 |
| <b>Question</b>                                                                                                                                                                                                                                                                                                                                                                                                              | <b>Response</b> |
| Are you submitting this manuscript to a special series or article collection?                                                                                                                                                                                                                                                                                                                                                | No              |
| <b>Experimental design and statistics</b><br><br>Full details of the experimental design and statistical methods used should be given in the Methods section, as detailed in our <a href="#">Minimum Standards Reporting Checklist</a> . Information essential to interpreting the data presented should be made available in the figure legends.<br><br>Have you included all the information requested in your manuscript? | Yes             |
| <b>Resources</b><br><br>A description of all resources used, including antibodies, cell lines, animals and software tools, with enough information to allow them to be uniquely identified, should be included in the Methods section. Authors are strongly encouraged to cite <a href="#">Research Resource Identifiers</a> (RRIDs) for antibodies, model organisms and tools, where possible.                              | Yes             |

|                                                                                                                                                                                                                                                                                                                                                                                                                                                                                                                                                         |            |
|---------------------------------------------------------------------------------------------------------------------------------------------------------------------------------------------------------------------------------------------------------------------------------------------------------------------------------------------------------------------------------------------------------------------------------------------------------------------------------------------------------------------------------------------------------|------------|
| <p>Have you included the information requested as detailed in our <a href="#">Minimum Standards Reporting Checklist</a>?</p>                                                                                                                                                                                                                                                                                                                                                                                                                            |            |
| <p><b>Availability of data and materials</b></p> <p>All datasets and code on which the conclusions of the paper rely must be either included in your submission or deposited in <a href="#">publicly available repositories</a> (where available and ethically appropriate), referencing such data using a unique identifier in the references and in the “Availability of Data and Materials” section of your manuscript.</p> <p>Have you have met the above requirement as detailed in our <a href="#">Minimum Standards Reporting Checklist</a>?</p> | <p>Yes</p> |

# **A chromosomal-level genome assembly for the giant African snail *Achatina fulica***

Guo Yunhai<sup>1,2, #</sup>, Zhang Yi<sup>1,2, #</sup>, Liu Qin<sup>1,2</sup>, Huang Yun<sup>1,2</sup>, Mao Guangyao<sup>1,2</sup>,  
Yue Zhiyuan<sup>1,2</sup>, Eniola M. Abe<sup>1,2</sup>, Li Jian<sup>3</sup>, Wu Zhongdao<sup>4</sup>, Li Shizhu<sup>1,2</sup>, Zhou  
Xiaonong<sup>1,2</sup>, Hu Wei<sup>1,2,3,\*</sup>, Xiao Ning<sup>1,2,\*</sup>

<sup>1</sup>National Institute of Parasitic Diseases, Chinese Center for Disease Control and Prevention

<sup>2</sup>Key Laboratory of Parasite and Vector Biology, Ministry of Health, Shanghai, China

<sup>3</sup>Department of Microbiology and Microbial Engineering , School of Life Sciences , Fudan University , Shanghai 200438 , China

<sup>4</sup>Department of Parasitology, Zhongshan School of Medicine, Sun Yat-sen University, Guangzhou 510080, China

1  
2  
3  
4  
5  
6  
7  
8  
9  
10  
11  
12  
13  
14  
15  
16  
17  
18  
19  
20  
21  
22  
23  
24  
25  
26  
27  
28  
29  
30  
31  
32  
33  
34  
35  
36  
37  
38  
39  
40  
41  
42  
43  
44  
45  
46  
47  
48  
49  
50  
51  
52  
53  
54  
55  
56  
57  
58  
59  
60  
61  
62  
63  
64  
65

## 26 Abstract

### 27 Background:

28 *Achatina fulica* (*A. fulica*), also called giant African snail, is the largest species in the  
29 reported terrestrial mollusks. Due to its greedy appetite, wide environmental  
30 adaptability, high growth rate and reproduction capacity, the species caused  
31 world-wide invasion, mainly in Southeast Asia, Japan, the western Pacific islands and  
32 China. *A. fulica* is a pest to damage the agricultural crops, as well as an intermediate  
33 host of many parasites to threaten human health. However, genomic information of *A.*  
34 *fulica* is still limited, hindering the genetic and genomic studies with the aim to  
35 invasion control and management of the species.

### 36 Finding:

37 Using *Kmer*-based method, we estimated the *A. fulica* genome size of 2.12 Gb with a  
38 high repeat content up to 71%. About 101.6 Gb genomic long-read data of *A. fulica*  
39 were generated from the PacBio sequencing platform and assembled to the first *A.*  
40 *fulica* genome of 1.85 Gb with a contig N50 length of 726 kb. Using contact  
41 information from the Hi-C sequencing data, we successfully anchored 99.32% contig  
42 sequences into 31 chromosomes, leading to the final contig and scaffold N50 length  
43 of 721 kb and 59.6 Mb, respectively. The continuity, completeness and accuracy were  
44 evaluated by genome comparison with other mollusk genomes, BUSCO assessment  
45 and genomic read mapping. 23,726 protein-coding genes were predicted from the  
46 assembled genome, among which 96.34% of the genes were functionally annotated.  
47 The phylogenetic analysis using whole-genome protein-coding genes revealed that *A.*  
48 *fulica* separated from the common ancestor with *Biomphalaria glabrata* around 182  
49 million years ago.

### 50 Conclusion:

51 As our best knowledge, the *A. fulica* genome was the first terrestrial mollusk genome  
52 reported so far. The chromosome sequences of *A. fulica* will not only provided the  
53 research community valuable genome resource for the population genetics and  
54 environmental adaptation studies for the species, as well as, for the chromosome  
55 level evolution investigation with other mollusks.

56  
57  
58 **Key Words:** Giant African snail, *Achatina fulica*, PacBio, Hi-C, chromosome  
59 assembly

## 60 Data description

## 61 Introduction

62 The giant African snail, *A. fulica*, is a Gastropod species (**Figure 1**). It is the largest  
63 interrestrial mollusks with greedy appetite, strong environmental adaptability, and high  
64 growth and reproduction rate<sup>1-3</sup>. Originating from East Africa, *A. fulica* gradually  
65 invaded Southeast Asia, Japan and the western Pacific islands in the last century<sup>4-6</sup>  
66 with the direct or indirect help from humans<sup>7-9</sup>. In mainland China, the first *A. fulica*  
67 invasion event was reported in 1931<sup>10</sup>. At present, the snail's natural distribution in the  
68 wild has been found in Guangdong, Hainan, Guangxi, southern parts of Yunnan  
69 Province and Fujian Province, and a county of Guizhou Province<sup>11</sup>. *A. fulica* was  
70 included as the first 16 alien invasive species in China  
71 ([http://www.mee.gov.cn/gkml/zj/wj/200910/t20091022\\_172155.htm](http://www.mee.gov.cn/gkml/zj/wj/200910/t20091022_172155.htm)) in 2003, and was  
72 also listed by International Union for Conservation of Nature (IUCN) as the 100 most  
73 threatening alien invasive species<sup>12</sup>. This snail has been recognized as an agricultural  
74 and garden pest that has caused significant damages in both tropical and subtropical  
75 regions<sup>9,12,13</sup>. In addition, *A. fulica* is also the intermediate host of *Angiostrongyl*  
76 *cantonensis*. Human infection with angiostrongyliasis, which occurs mainly through  
77 consumption of snails carrying *A. cantonensis* larvae, causes eosinophilic  
78 meningoencephalitis<sup>4,11,14-18</sup>. As a consequence, *A. fulica* is attracting more and more  
79 attention in fields of both agricultural crops protection and human disease control.

80 To date, a variety of mollusk genomes have been analyzed and published,  
81 including two freshwater gastropods snails *Pomacea canaliculata*<sup>19</sup> and *Biomphalaria*  
82 *glabrata*<sup>20</sup>. However, no genome has been reported for terrestrial mollusks. *A. fulica* is  
83 considered to be one of the most serious threat and a destructive terrestrial gastropod  
84 which poses a significant hazard to agriculture, the environment, biodiversity and  
85 human health. In this work, we applied Illumina, PacBio and Hi-C techniques to  
86 construct the chromosome of *A. fulica*. The genome is the first terrestrial mollusk

1  
2  
3  
4  
5  
6  
7  
8  
9  
10  
11  
12  
13  
14  
15  
16  
17  
18  
19  
20  
21  
22  
23  
24  
25  
26  
27  
28  
29  
30  
31  
32  
33  
34  
35  
36  
37  
38  
39  
40  
41  
42  
43  
44  
45  
46  
47  
48  
49  
50  
51  
52  
53  
54  
55  
56  
57  
58  
59  
60  
61  
62  
63  
64  
65

87 genome, providing an important reference for the molecular mechanism  
88 investigations for its broad environmental adaptability and the development of control  
89 strategy of the world-wide invasion.

## 90 **Sample and sequencing**

91 An adult snail (**Figure 1**), which was collected in Pingxiang city, Guangxi Autonomous  
92 Region, was used for reference genome construction. The snail was dissected and  
93 abdominal foot (17.4 g) and liver pancreas (40.4 g) tissues were collected and quickly  
94 frozen in liquid nitrogen overnight before transferring to -80 °C for storage. DNA was  
95 extracted using the traditional phenol/chloroform extraction method and was quality  
96 checked using agarose gel electrophoresis, meeting the requirement for library  
97 construction for the Illumina X Ten (Illumina Inc., San Diego, CA, USA) and for the  
98 PacBio Sequel (Pacific Biosciences of California, Menlo Park, CA, USA) sequencing  
99 platforms.

100 Using the DNA molecules from abdominal foot, a library with the insertion length  
101 of 300 bp were constructed and sequenced for Illumina sequencing platform  
102 according to the manufacturer's protocol. About 195.4 Gb short reads were obtained  
103 from the Illumina X Ten sequencing technology (**Table 1**), which was used for the  
104 following genome survey analysis, and for final base-level genome sequence  
105 correction. Meanwhile, four 20 kb libraries were constructed for PacBio Sequel  
106 sequencing. Using 16 sequencing SMRT cells, 101.6 Gb long reads were generated  
107 (**Table 1**). The mean and N50 lengths of the polymerases for sequencing cells ranged  
108 from 6.4 kb to 10.4 kb and from 12.3 kb to 20.3 kb for cells, respectively. Those long  
109 genomic DNA reads were used for reference genome construction.

## 110 **Genome features estimation from Kmer method**

111 With sequencing data from the Illumina platform, several genome characters could be  
112 evaluated from *A. fulica*. To ensure the quality of the analysis, ambiguous bases and  
113 low-quality reads were trimmed and filtered using the HTQC package<sup>21</sup>. The following

114 quality control were performed under the framework of HTQC. First, the quality of  
115 bases at two read ends were checked. Bases in sliding 5 bp windows were deleted if  
116 the average quality of the window was below phred quality score of 20. Second, reads  
117 were filtered if the average phred quality score were smaller than 20 or the read  
118 length was shorter than 75 bp. Third, the mate reads were also removed if the  
119 corresponding reads were filtered.

120 The quality-controlled reads were used for genome character estimation. We  
121 calculated the number of each 17-mer from the sequencing data using the jellyfish  
122 software<sup>22</sup>, and the distribution was analyzed with GCE software<sup>23</sup>. We estimated the  
123 genome size of 2.12 Gb with the heterozygosity of 0.47% and repeat content of 71%  
124 in the genome. Previous studies revealed that repeat content varies in mollusks, and  
125 that repeat content is correlated with genome size<sup>24</sup>. The large genome size and high  
126 proportion of repeat contents of *A. fulica* provided additional supporting data for the  
127 statically analysis.

## 128 **Genome assembly by third-generation long reads**

129 After removing adaptor sequences in polymerases, 101.6 Gb subreads were  
130 generated for the following whole genome assembly. The average and N50 length of  
131 subreads reached 5.25 kb and 8.80 kb, respectively. To optimize the genome  
132 assembly using the PacBio sequencing data, we applied two packages in the  
133 assembly process, Canu<sup>25</sup> and FALCON<sup>26</sup>. Canu package was first applied for the  
134 assembly with the default parameters. As a result, a 1.93 Gb genome was  
135 constructed with 10,417 contigs and a contig N50 length of 662.40 kb. FALCON was  
136 also employed using the length\_cutoff and pr\_length\_cutoff parameters of 10 kb and  
137 8 kb, respectively. We obtained 1.85 Gb genome with 8,585 contigs, with a contig N50  
138 of 726.63 kb. We adopted the FALCON assembly as the reference genome for *A.*  
139 *fulica* (**Table 2**). The genome sequences were subsequently polished by PacBio long  
140 reads using arrow<sup>27</sup> and Illumina short reads by pilon<sup>28</sup> to correct base errors. The



1  
2  
3  
4  
5  
6  
7  
8  
9  
10  
11  
12  
13  
14  
15  
16  
17  
18  
19  
20  
21  
22  
23  
24  
25  
26  
27  
28  
29  
30  
31  
32  
33  
34  
35  
36  
37  
38  
39  
40  
41  
42  
43  
44  
45  
46  
47  
48  
49  
50  
51  
52  
53  
54  
55  
56  
57  
58  
59  
60  
61  
62  
63  
64  
65

141 corrected genome was further applied for the following chromosome assembly  
142 construction using Hi-C data.

143 ***In situ* Hi-C library construction and chromosome assembly using Hi-C**  
144 **data**

145 Liver pancreas tissue of *A. fulica* was used for library construction for Hi-C analysis  
146 and the library was constructed using the identical method in previous studies<sup>29</sup>.  
147 Finally, the library was sequenced with 150 paired-end mode on the Illumina HiSeq X  
148 Ten platform (San Diego, CA, United States). From the Illumina sequencing platform,  
149 1,313 million paired-end reads were obtained for the Hi-C library (**Table 1**). The reads  
150 were mapped to the above *A. fulica* genome with Bowtie<sup>30</sup>, with two ends of paired  
151 reads being mapped to the genome separately. To increase the interactive Hi-C reads  
152 ratio, an iterative mapping strategy was performed as previous studies, and only read  
153 pairs that both ends uniquely mapped were used for the following analysis. From the  
154 alignment status of two ends, self-ligation, non-ligation and other sorts of invalid reads,  
155 including StartNearRsite, PCR amplification, random break, LargeSmallFragments  
156 and ExtremeFragments, were filtered out by Hi-Clib<sup>31</sup>. Through the recognition of  
157 restriction sites in sequences, contact counts among contigs were calculated and  
158 normalized.

159 According to previous karyotype analyses, *A. fulica* had 31 chromosomes<sup>32</sup>. By  
160 clustering the contigs using the contig contact frequency matrix, we were able to  
161 correct some minor errors in the FALCON assembly results. Contigs with errors were  
162 broken into shorter contigs. We obtained 8,701 contigs, slightly more than the 8,585  
163 contigs in the FALCON assembly. We successfully clustered these contigs into 31  
164 groups in Lachesis<sup>33</sup> using the agglomerative hierarchical clustering method (**Figure**  
165 **2**). Lachesis was further applied to order and orient the clustered contigs according to  
166 the contact matrix. As a result, 7,106 contigs were reliably anchored, ordered and  
167 orientated on chromosomes, accounting for 99.32% of the total genome bases. Then,

168 we applied PBJelly<sup>34</sup> to fill the gap using PacBio long reads to merge the contig  
169 sequences. Finally, the first chromosomal-level assembly of *A. fulica* was obtained  
170 with 8,211 contigs, a contig N50 of 721.0 kb and a scaffold N50 of 59.59 Mb (**Table 2**  
171 and **Figure 3**).

## 172 **Genome quality evaluation**

173 We assessed the quality of genome of *A. fulica* after the assembly process. The  
174 quality evaluation was carried out in three aspects: continuity, completeness and base  
175 level accuracy.

176 First of all, we compared the sequence number and N50 length of contig of *A.*  
177 *fulica* with public genome of mollusks and found that our assembly has a high quality  
178 on contig and scaffold N50 among mollusk genomes. (**Figure 3**) As previous studies,  
179 genomic heterozygosity of mollusk was one of the biggest challenges for genome  
180 assembly, both in terms of contig and scaffold assembly<sup>35</sup>. Our work illustrated that  
181 the genome assembly using PacBio long sequencing data was affordable and  
182 effective to overcome the difficulty of mollusk genome assembly. Traditional  
183 chromosomal genome assembly requires physical maps and genetic maps, which is  
184 enormously time-and labor-consuming. With Hi-C data analysis, we successfully  
185 assembled *A. fulica* genome into chromosome-level with just one individual.

186 Second, the assembled genome was subjected to the BUSCO (version 3.0)<sup>36</sup> to  
187 assess the completeness of the genome. 91.7% of the BUSCO genes were identified  
188 in *A. fulica* genome. More than 84.7% BUSCO gene were single-copy completed in  
189 our genome, illuminating a high level of completeness of the genome.

190 Third, NGS short reads were aligned to the genome using BWA package<sup>37</sup>. About  
191 98.7% of paired reads were aligned to the genome, of which 98.24% were reads  
192 paired aligned. From the NGS reads alignment, we detected 128,998 homologous  
193 SNP loci using the GATK pipeline<sup>38</sup>, demonstrating the high base-level accuracy of  
194 99.33%.

## 195 **Repeat element and gene annotation**

1  
2  
3 196 Tandem Repeat Finder (TRF)<sup>39</sup> was used for repetitive element identification in the *A.*  
4  
5 197 *fulica* genome. A *de novo* method applying RepeatModuler was used to detect  
6  
7 198 transposable elements (TEs). The resulted *de novo* data, combined with known  
8  
9 199 repeat library from Repbase<sup>40</sup>, were used to identify TEs in the *A. fulica* genome by  
10  
11 200 RepeatMasker<sup>41</sup> software. All repetitive elements were masked in the genome for the  
12  
13 201 protein-coding gene prediction.

14  
15  
16 202 Protein-coding genes in the *A. fulica* genome were annotated using the *de novo*  
17  
18 203 program Augustus<sup>42</sup>. Protein sequences of the closely related species including  
19  
20 204 *Aplysia californica*, *Biomphalaria glabrata*, *Crassostrea gigas*, *Lottia gigantea* and  
21  
22 205 *Patinopecten yessoensis*, were downloaded from the Ensembl database, and aligned  
23  
24 206 to the *A. fulica* genome with TBLASTN. Full-length transcripts obtained using Iso-Seq  
25  
26 207 were mapped to the genome using Genewise<sup>43</sup>. Finally, gene models predicted from  
27  
28 208 all above methods were combined by MAKER<sup>44</sup>, resulting in 23,726 protein-coding  
29  
30 209 genes. The gene number, gene length, CDS length, exon length and intron length  
31  
32 210 distribution were all comparable with the related mollusks (**Figure 4**).

33  
34  
35  
36  
37 211 To functionally annotate protein-coding genes in the *A. fulica* genome, we  
38  
39 212 searched all predicted gene sequences to NCBI non-redundant nucleotide (NT) and  
40  
41 213 protein (NR), Swiss-Prot databases by BLASTN<sup>45</sup> and BLASTX<sup>46</sup> utility. Blast2GO<sup>47</sup>  
42  
43 214 was also used to assign gene ontology (GO)<sup>48</sup> and Kyoto Encyclopedia of Genes and  
44  
45 215 Genomes (KEGG)<sup>49</sup> pathways. A threshold of e-value of 1e-5 was used for all BLAST  
46  
47 216 applications. Finally, 22,858 (96.34%) genes were functionally annotated (**Table 3**).

## 51 **Phylogenetic analysis of *A. fulica* with other mollusks**

52  
53 218 OrthoMCL<sup>50</sup> was used to cluster gene families. First, proteins from *A. fulica* and the  
54  
55 219 closely related mollusks, including *Aplysia californica*, *Biomphalaria glabrata*,  
56  
57 220 *Crassostrea gigas*, *Lingula anatina*, *Lottia gigantea*, *Patinopecten yessoensis*,  
58  
59 221 *Octopus bimaculoides*, *Helobdella robusta*, *Drosophila melanogaster* and *Pomacea*  
60  
61  
62  
63  
64  
65

1  
2  
3  
4  
5  
6  
7  
8  
9  
10  
11  
12  
13  
14  
15  
16  
17  
18  
19  
20  
21  
22  
23  
24  
25  
26  
27  
28  
29  
30  
31  
32  
33  
34  
35  
36  
37  
38  
39  
40  
41  
42  
43  
44  
45  
46  
47  
48  
49  
50  
51  
52  
53  
54  
55  
56  
57  
58  
59  
60  
61  
62  
63  
64  
65

222 *canaliculata* were all-to-all blasted by BLASTP<sup>46</sup> utility with an e-value threshold of  
223 1e-5. Only proteins from the longest transcript were used for genes with alternative  
224 splices. We identified 25,448 gene families for *A. fulica* and the related species,  
225 among them 675 single-copy orthologs families were detected.

226 Using single-copy orthologs, we could probe the phylogenetic relationships for  
227 the *A. fulica* and other mollusks. To this end, protein sequences of single-copy genes  
228 were aligned using CLUSTALX<sup>51</sup>. Guided by the protein multi-sequence alignment,  
229 the alignment of the coding DNA sequences (CDS) for those genes were generated  
230 and concatenated for the following analysis. The phylogenetic relationships were  
231 constructed using PhyML<sup>52</sup> using the concatenated nucleotide alignment with the  
232 JTT+G+F model. The PAML MCMCtree program<sup>52</sup> was used to estimate the species  
233 divergent time scales for the mollusks using approximate likelihood method. We found  
234 that *A. fulica* was most closely related to *Biomphalaria glabrata*, and the two species  
235 diverged from their common ancestor around 177.1-187.1 million years ago (MYA)  
236 **(Figure 5)**.

## 237 **Conclusion**

238 We reconstructed the first chromosome level assembly for *A. fulica* using an  
239 integrated strategy of PacBio, Illumina and Hi-C technologies. Using the long reads  
240 from PacBio Sequel platform and short reads from the Illumina X Ten platform, we  
241 successfully constructed contig assembly for *A. fulica*. Leveraging contact information  
242 among contigs from Hi-C technology, we further improved the assembly to the  
243 chromosome-level quality **(Figure 2 and Figure 3)**. We annotated 23,726  
244 protein-coding genes in the *A. fulica* genome and 22,858 of genes were functionally  
245 annotated. With 675 single-copy orthologs from *A. fulica* and other related mollusks,  
246 we construct the phylogenetic relationship of these mollusks, and found that *A. fulica*  
247 might have diverged from its common ancestor of *Biomphalaria glabrata* around  
248 177.1-187.1 MYA. Given the increasing interests in mollusk genomic evolution and

1  
2  
3  
4  
5  
6  
7  
8  
9  
10  
11  
12  
13  
14  
15  
16  
17  
18  
19  
20  
21  
22  
23  
24  
25  
26  
27  
28  
29  
30  
31  
32  
33  
34  
35  
36  
37  
38  
39  
40  
41  
42  
43  
44  
45  
46  
47  
48  
49  
50  
51  
52  
53  
54  
55  
56  
57  
58  
59  
60  
61  
62  
63  
64  
65

249 the biological importance of *A. fulica* as an invasive animal, our genomic and  
250 transcriptome data provide valuable genetic resource for the following functional  
251 genomics investigations for the research community.

252

### 253 **Ethics Statement**

254 This study was approved by the Animal Care and Use committee of National Institute  
255 of Parasitic Diseases, Chinese Center for Disease Control and Prevention. All  
256 participants consent the study under the 'Ethics, consent and permissions' heading.  
257 All participants consent to publish the work under the 'Consent to publish' heading.

### 258 **Availability of supporting data**

259 The Illumina, PacBio and Hi-C sequencing data are available from NCBI via the  
260 accession number of SRR8369706, SRR8369311 and SRR8371669, respectively.  
261 The Illumina transcriptome sequencing data were deposited to NCBI via the  
262 accession number of SRR8371872 and SRR8371873. The genome, annotation and  
263 intermediate files were uploaded to GigaScience FTP server.

### 264 **Competing interests**

265 The authors declare that they have no competing interests.

### 266 **Acknowledgement**

267 This work was supported by the National Key Research and Development Program of  
268 China (No. 2016YFC1200500 and 2016YFC1202000). The authors thank Frasergen  
269 Bioinformatics for providing technique supports for this work.

### 270 **Author Contributions**

271 Z.X, H.W and X.N conceived the project. G.Y, Z.Y, L.Q collected the samples and  
272 extracted the genomic DNA. G.Y, Z.Y and L.Q performed the genome assembly and  
273 data analysis. G.Y, Z.X, H.W and X.N wrote the paper.

274 **References**

- 1  
2 275 1 Schreurs, J. Investigations on the biology, ecology and control of Giant African Snail 290 in  
3 276 West New Guinea. (Manokwari Agricultural Research Station., 1963).  
4  
5 277 2 Albuquerque, F. S., Peso-Aguiar, M. C. & Assunção-Albuquerque, M. J. Distribution, feeding  
6 278 behavior and control strategies of the exotic land snail *Achatina fulica*  
7 279 (Gastropoda: Pulmonata) in the Northeast of Brazil. *Braz.J.Biol.* **68**, 6 (2008).  
8  
9 280 3 Thiengo, S. C., Fernandez, M. A., Torres, E. J., Coelho, P. M. & Lanfredi, R. M. First record of  
10 281 an nematode Metastrongyloidea (Aelurostrongylus abstrusus larvae) in *Achatina* (Lissachatina)  
11 282 *fulica* (Mollusca, Achatinidae) in Brazil. *J. Invertebr. Pathol.* **98**, 6 (2008).  
12  
13 283 4 Lv, S., Zhang, Y. & Liu, H. X. Invasive Snails and an Emerging Infectious Disease: Results from  
14 284 the First National Survey on Angiostrongylus cantonensis in China. *BioOne*,  
15 285 doi:10.1371/journal.pntd.0000368 (2009).  
16  
17 286 5 Cowie, R. H. Non-indigenous land and freshwater molluscs in the islands of the Pacific:  
18 287 Conservation impacts and threats. 143-172 (2000).  
19  
20 288 6 Cowie, R. H. Can snails ever be effective and safe biocontrol agents? *Int J Pest Manage* **47**, 18  
21 289 (2001).  
22  
23 290 7 Cowie, R. H. & Robinson, D. G. *Pathways of introduction of nonindigenous land and*  
24 291 *freshwater snails and slugs.* 93-122 (Island Press, 2003).  
25  
26 292 8 Kotangale, J. P. Giant African snail (*Achatina fulica* Bowdich). *J Environ Sci Eng*, 6 (2011).  
27 293 9 Raut, S. K. & Barker, G. M. *Achatina fulica* Bowdich and Other Achatinidae as Pests in Tropical  
28 294 Agriculture. (CABI International, 2002).  
29  
30 295 10 Jarreit, V. H. C. The spread of the snail *Achatina fulica* to south China. *Hong Kong Nat* **2**, 3  
31 296 (1931).  
32  
33 297 11 Shan, L., Yi, Z. & Peter, S. Emerging Angiostrongyliasis in Mainland China. *Emerging Infectious*  
34 298 *Diseases* **14**, 4 (2008).  
35  
36 299 12 Lowe, S., Browne, S. M., Boudjrlas, S. & De Poorter, M. *100 of the world's worst invasive alien*  
37 300 *species: A selection from the global invasive species database. The Invasive Species Specialists*  
38 301 *Group of the Species Survival Commission of the World Conservation Union.*, (Hollands  
39 302 Printing, 2000).  
40  
41 303 13 Mead, A. R. *Pulmonates volume 2B. Economic malacology with particular reference to*  
42 304 *Achatina fulica.* (Academic Press, 1979).  
43  
44 305 14 Alicata, J. E. The discovery of Angiostrongylus cantonensis as a cause of human eosinophilic  
45 306 meningitis. *Parasitol Today* **7**, 151-153 (1991).  
46  
47 307 15 Prociw, P., Spratt, D. M. & Carlisle, M. S. Neuro-angiostrongyliasis: unresolved issues. *Int J*  
48 308 *Parasitol* **30**, 1295-1303 (2000).  
49  
50 309 16 Deng, Z. H., Zhang, Q. M., Huang, S. Y. & Jones, J. L. First provincial survey of Angiostrongylus  
51 310 cantonensis in Guangdong Province, China. *Trop Med Int Health* **17**, 4 (2012).  
52  
53 311 17 Maldonado, J. A. *et al.* First report of Angiostrongylus cantonensis (Nematoda:  
54 312 Metastrongylidae) in *Achatina fulica* (Mollusca: Gastropoda) from Southeast and South  
55 313 Brazil. *Mem Inst Oswaldo Cruz* **105**, 4 (2010).  
56  
57 314 18 Vitta, A., Polseela, R., Nateeworanart, S. & Tattiyapong, M. Survey of Angiostrongylus  
58 315 cantonensis in rats and giant African land snails in Phitsanulok Province, Thailand. *Asian Pac J*  
59 316 *Trop Med* **4**, 3 (2011).  
60  
61 317 19 Liu, C. *et al.* The genome of the golden apple snail *Pomacea canaliculata* provides insight into

1 318 stress tolerance and invasive adaptation. *Gigascience* **7**, doi:10.1093/gigascience/giy101  
2 319 (2018).  
3 320 20 Adema, C. M. *et al.* Whole genome analysis of a schistosomiasis-transmitting freshwater  
4 321 snail. *Nature communications* **8**, 15451, doi:10.1038/ncomms15451 (2017).  
5 322 21 Neff, K. L. *et al.* Mojo Hand, a TALEN design tool for genome editing applications. *BMC*  
6 323 *Bioinformatics* **14**, 1, doi:10.1186/1471-2105-14-1 (2013).  
7 324 22 Marçais, G. & Kingsford, C. A fast, lock-free approach for efficient parallel counting of  
8 325 occurrences of k-mers. *Bioinformatics* **27**, 764-770, doi:10.1093/bioinformatics/btr011  
9 326 (2011).  
10 327 23 Binghang Liu, Y. S., Jianying Yuan, Xuesong Hu, Hao Zhang, Nan Li, Zhenyu Li, Yanxiang  
11 328 Chen, Desheng Mu, Wei Fan. Estimation of genomic characteristics by analyzing k-mer  
12 329 frequency in de novo genome projects. *Quantitative Biology* **35**, 62-67 (2013).  
13 330 24 Murgarella, M. *et al.* A First Insight into the Genome of the Filter-Feeder Mussel *Mytilus*  
14 331 *galloprovincialis*. *PLoS One* **11**, e0151561, doi:10.1371/journal.pone.0151561 (2016).  
15 332 25 Koren, S. *et al.* Canu: scalable and accurate long-read assembly via adaptive k-mer weighting  
16 333 and repeat separation. *Genome Res* **27**, 722-736, doi:10.1101/gr.215087.116 (2017).  
17 334 26 Chin, C. S. *et al.* Phased diploid genome assembly with single-molecule real-time sequencing.  
18 335 *Nat Methods* **13**, 1050-1054, doi:10.1038/nmeth.4035 (2016).  
19 336 27 Chin, C.-S. *et al.* Nonhybrid, finished microbial genome assemblies from long-read SMRT  
20 337 sequencing data. *Nature methods* **10**, 563 (2013).  
21 338 28 Walker, B. J. *et al.* Pilon: an integrated tool for comprehensive microbial variant detection  
22 339 and genome assembly improvement. *PLoS one* **9**, e112963 (2014).  
23 340 29 Gong, G. *et al.* Chromosomal-level assembly of yellow catfish genome using third-generation  
24 341 DNA sequencing and Hi-C analysis. *Gigascience*, doi:10.1093/gigascience/giy120 (2018).  
25 342 30 Langmead, B., Trapnell, C., Pop, M. & Salzberg, S. L. Ultrafast and memory-efficient alignment  
26 343 of short DNA sequences to the human genome. *Genome Biol* **10**, R25,  
27 344 doi:10.1186/gb-2009-10-3-r25 (2009).  
28 345 31 Burton, J. N. *et al.* Chromosome-scale scaffolding of de novo genome assemblies based on  
29 346 chromatin interactions. *Nature biotechnology* **31**, 1119 (2013).  
30 347 32 Sun, T. Chromosomal studies in three land snails. *Sinozoologia* **12**, 154-162 (1995).  
31 348 33 Near, T. J. *et al.* Phylogeny and tempo of diversification in the superradiation of spiny-rayed  
32 349 fishes. *Proceedings of the National Academy of Sciences of the United States of America* **110**,  
33 350 12738 (2013).  
34 351 34 English, A. C. *et al.* Mind the gap: upgrading genomes with Pacific Biosciences RS long-read  
35 352 sequencing technology. *PLoS one* **7**, e47768 (2012).  
36 353 35 Zhang, G. *et al.* The oyster genome reveals stress adaptation and complexity of shell  
37 354 formation. *Nature* **490**, 49 (2012).  
38 355 36 Simão, F. A., Waterhouse, R. M., Ioannidis, P., Kriventseva, E. V. & Zdobnov, E. M. BUSCO:  
39 356 assessing genome assembly and annotation completeness with single-copy orthologs.  
40 357 *Bioinformatics* **31**, 3210-3212 (2015).  
41 358 37 Li, H. & Durbin, R. Fast and accurate short read alignment with Burrows–Wheeler transform.  
42 359 *bioinformatics* **25**, 1754-1760 (2009).  
43 360 38 McKenna, A. *et al.* The Genome Analysis Toolkit: a MapReduce framework for analyzing  
44 361 next-generation DNA sequencing data. *Genome research* (2010).

1  
2  
3  
4  
5  
6  
7  
8  
9  
10  
11  
12  
13  
14  
15  
16  
17  
18  
19  
20  
21  
22  
23  
24  
25  
26  
27  
28  
29  
30  
31  
32  
33  
34  
35  
36  
37  
38  
39  
40  
41  
42  
43  
44  
45  
46  
47  
48  
49  
50  
51  
52  
53  
54  
55  
56  
57  
58  
59  
60  
61  
62  
63  
64  
65

362 39 Benson, G. Tandem repeats finder: a program to analyze DNA sequences. *Nucleic Acids Res*  
363 **27**, 573-580 (1999).

364 40 Bao, W., Kojima, K. K. & Kohany, O. Repbase Update, a database of repetitive elements in  
365 eukaryotic genomes. *Mob DNA* **6**, 11, doi:10.1186/s13100-015-0041-9 (2015).

366 41 Chen, N. Using RepeatMasker to identify repetitive elements in genomic sequences. *Current*  
367 *protocols in bioinformatics* **5**, 4.10. 11-14.10. 14 (2004).

368 42 Stanke, M. *et al.* AUGUSTUS: ab initio prediction of alternative transcripts. *Nucleic acids*  
369 *research* **34**, W435-W439 (2006).

370 43 Birney, E., Clamp, M. & Durbin, R. GeneWise and genomewise. *Genome research* **14**, 988-995  
371 (2004).

372 44 Cantarel, B. L. *et al.* MAKER: an easy-to-use annotation pipeline designed for emerging model  
373 organism genomes. *Genome research* **18**, 188-196 (2008).

374 45 Gertz, E. M., Yu, Y. K., Agarwala, R., Schaffer, A. A. & Altschul, S. F. Composition-based  
375 statistics and translated nucleotide searches: improving the TBLASTN module of BLAST. *BMC*  
376 *Biol* **4**, 41, doi:10.1186/1741-7007-4-41 (2006).

377 46 Camacho, C. *et al.* BLAST+: architecture and applications. *BMC Bioinformatics* **10**, 421,  
378 doi:10.1186/1471-2105-10-421 (2009).

379 47 Conesa, A. *et al.* Blast2GO: a universal tool for annotation, visualization and analysis in  
380 functional genomics research. *Bioinformatics* **21**, 3674-3676 (2005).

381 48 Consortium, G. O. The Gene Ontology (GO) database and informatics resource. *Nucleic acids*  
382 *research* **32**, D258-D261 (2004).

383 49 Kanehisa, M. & Goto, S. KEGG: kyoto encyclopedia of genes and genomes. *Nucleic acids*  
384 *research* **28**, 27-30 (2000).

385 50 Li, L., Stoeckert, C. J. & Roos, D. S. OrthoMCL: identification of ortholog groups for eukaryotic  
386 genomes. *Genome research* **13**, 2178-2189 (2003).

387 51 Thompson, J. D., Gibson, T. J. & Higgins, D. G. Multiple sequence alignment using ClustalW  
388 and ClustalX. *Current protocols in bioinformatics*, 2.3. 1-2.3. 22 (2003).

389 52 Guindon, S., Lethiec, F., Duroux, P. & Gascuel, O. PHYML Online—a web server for fast  
390 maximum likelihood-based phylogenetic inference. *Nucleic acids research* **33**, W557-W559  
391 (2005).

392  
393



394

395 **Tables and Figures**

396

397 **Table 1: Sequencing data generated for *A. fulica* genome assembly and annotation**

| Source        | Library type | Platform      | Library size (bp) | Data size (Gb) | Application                       |
|---------------|--------------|---------------|-------------------|----------------|-----------------------------------|
| Genome        | Short reads  | HiSeq X Ten   | 350               | 195.4          | Genome survey and base correction |
|               | Long reads   | PacBio SEQUEL | 20,000            | 101.6          | Genome assembly                   |
|               | Hi-C         | HiSeq X Ten   | 300-500           | 208.9          | Chromosome construction           |
| Transcriptome | Long reads   | PacBio SEQUEL | 3000, 5000        | 22.5           | Genome annotation                 |

398

399

400

401 **Table 2: Statistics for genome assembly of *A. fulica***

| Sample ID | Length        |               | Number   |          |
|-----------|---------------|---------------|----------|----------|
|           | Contig** (bp) | Scaffold (bp) | Contig** | Scaffold |
| Total     | 1,852,282,574 | 1,855,883,074 | 8,211    | 1,010    |
| Max       | 5,947,392     | 116,558,012   | -        | -        |
| N50       | 721,038       | 59,589,303    | 697      | 13       |
| N60       | 538,883       | 58,013,356    | 995      | 16       |
| N70       | 399,612       | 53,672,006    | 1,396    | 20       |
| N80       | 268,901       | 50,673,968    | 1,957    | 23       |
| N90       | 141,756       | 44,109,545    | 2,888    | 27       |

402

403

404 **Table 3: Statistics for genome annotation of *A. fulica***

| Database  | Number | Percent |
|-----------|--------|---------|
| InterPro  | 16,252 | 68.50   |
| GO        | 12,101 | 51.00   |
| KEGG ALL  | 21,325 | 89.88   |
| KEGG KO   | 10,161 | 42.83   |
| Swissprot | 17,050 | 71.86   |
| TrEMBL    | 22,403 | 94.42   |
| NR        | 22,553 | 95.06   |
| Total     | 23,726 |         |

405

406

1  
2  
3  
4  
5  
6  
7  
8  
9  
10  
11  
12  
13  
14  
15  
16  
17  
18  
19  
20  
21  
22  
23  
24  
25  
26  
27  
28  
29  
30  
31  
32  
33  
34  
35  
36  
37  
38  
39  
40  
41  
42  
43  
44  
45  
46  
47  
48  
49  
50  
51  
52  
53  
54  
55  
56  
57  
58  
59  
60  
61  
62  
63  
64  
65

407

1  
2  
3  
4  
5  
6  
7  
8  
9  
10  
11  
12  
13  
14  
15  
16  
17  
18  
19  
20  
21  
22  
23  
24  
25  
26  
27  
28  
29  
30  
31  
32  
33  
34  
35  
36  
37  
38  
39  
40  
41  
42  
43  
44  
45  
46  
47  
48  
49  
50  
51  
52  
53  
54  
55  
56  
57  
58  
59  
60  
61  
62  
63  
64  
65

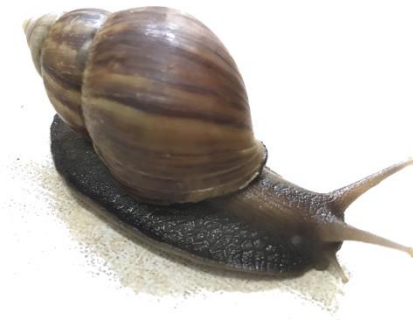

408

409 **Figure 1. A picture of *A. fulica* that used for genome sequencing and assembly.**

410

411

412

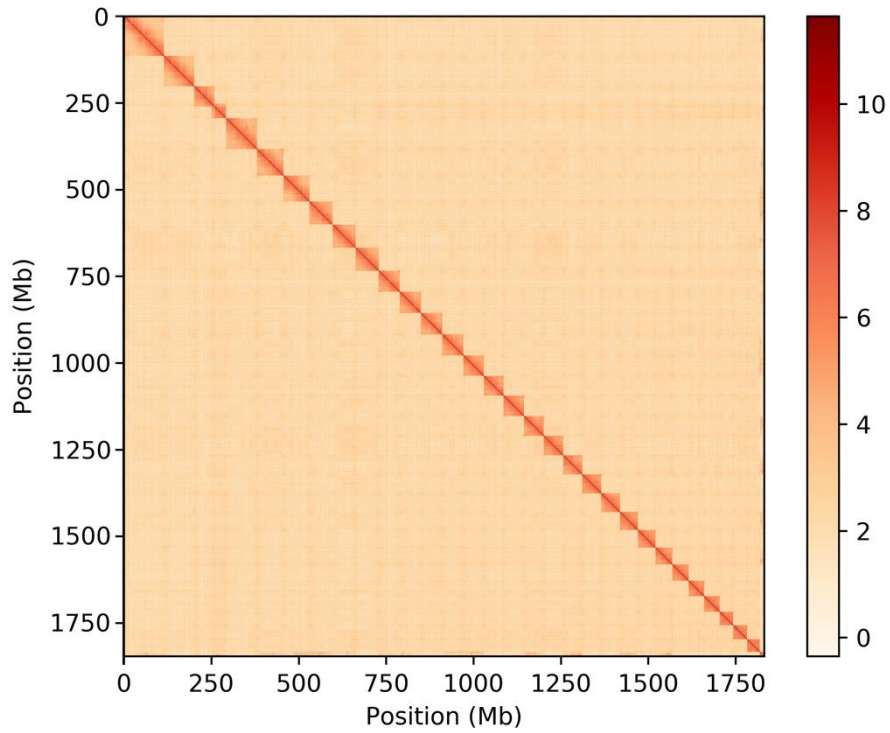

413

414 **Figure 2. Contact matrix generated from the Hi-C data analysis showing sequence**  
415 **interactions in chromosomes. The logarithm of the contact density was showed in the**  
416 **color bar.**

417

418

419

420

421

422

423

424

425

426

1  
2  
3  
4  
5  
6  
7  
8  
9  
10  
11  
12  
13  
14  
15  
16  
17  
18  
19  
20  
21  
22  
23  
24  
25  
26  
27  
28  
29  
30  
31  
32  
33  
34  
35  
36  
37  
38  
39  
40  
41  
42  
43  
44  
45  
46  
47  
48  
49  
50  
51  
52  
53  
54  
55  
56  
57  
58  
59  
60  
61  
62  
63  
64  
65

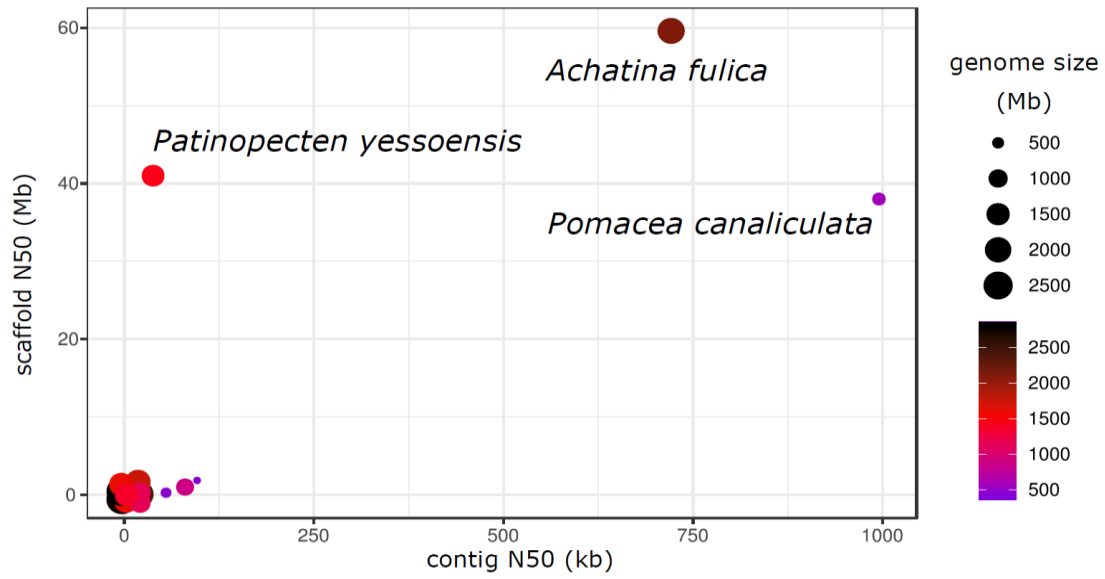

427  
428  
429  
430  
431

**Figure 3: Genome assembly comparison of *A. fulica* with other sequenced mollusk genomes.** The x- and y-axis represent the contig and scaffold N50s, respectively. The genomes assembled into chromosomal level are labeled with names.

1  
2  
3  
4  
5  
6  
7  
8  
9  
10  
11  
12  
13  
14  
15  
16  
17  
18  
19  
20  
21  
22  
23  
24  
25  
26  
27  
28  
29  
30  
31  
32  
33  
34  
35  
36  
37  
38  
39  
40  
41  
42  
43  
44  
45  
46  
47  
48  
49  
50  
51  
52  
53  
54  
55  
56  
57  
58  
59  
60  
61  
62  
63  
64  
65

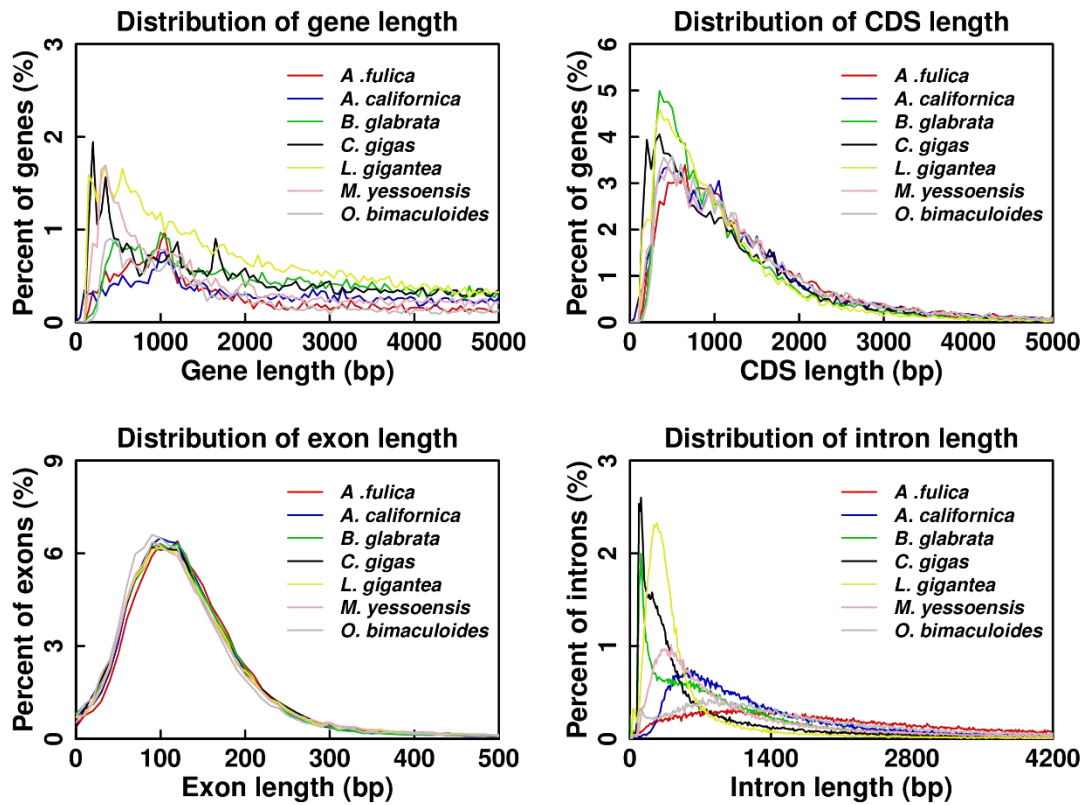

433  
 434  
 435 **Figure 4. Length distribution comparison on total gene, CDS, exon, and intron of**  
 436 **annotated gene models of *A. fulica* with other closely related species.** The  
 437 comparison of length distribution of genes (A), CDS (B), exon (C) and intron (D) for *A.*  
 438 *fulica* to those in *A.californica* , *B. glabrata* , *C. gigas* , *L. gigantea* , *P. yessoensis* and *O.*  
 439 *bimaculoides*.

440

441

442

443

444

445

446

447

448

449

450

451

452

453

454

455

456

457

458

459

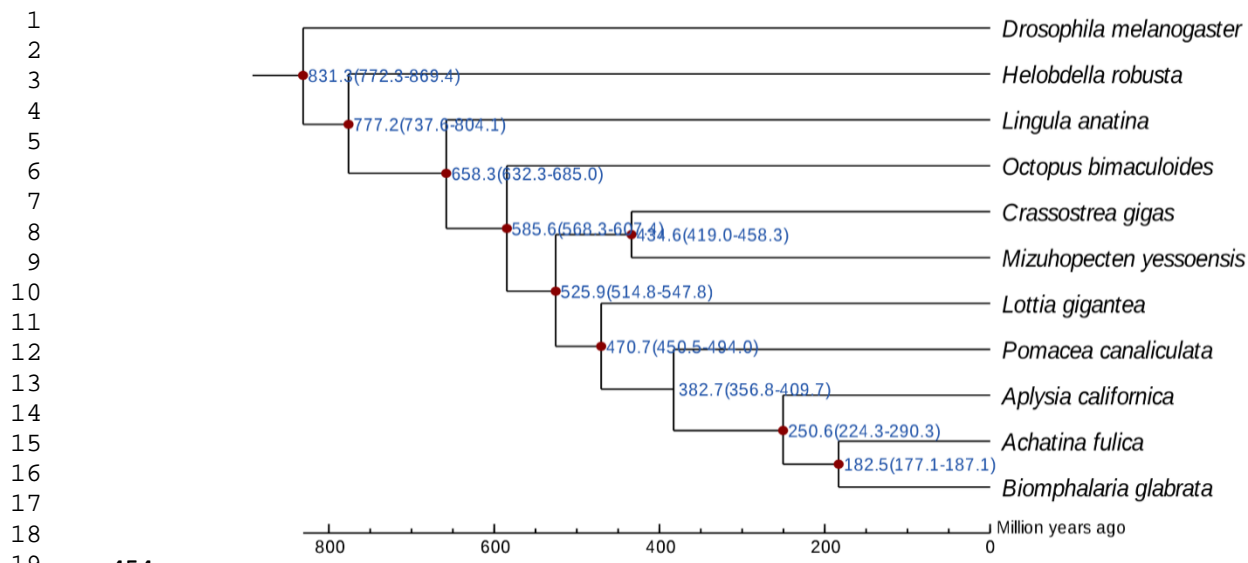

454

455 **Figure 5. Phylogenetic relationship between *A. fulica* and related species.** The  
 456 divergence time (million years ago) and the 95% confidential intervals are labeled at  
 457 branch sites and the red dots in the tree illuminated the speciation for the time  
 458 recalibration.

459

30  
31  
32  
33  
34  
35  
36  
37  
38  
39  
40  
41  
42  
43  
44  
45  
46  
47  
48  
49  
50  
51  
52  
53  
54  
55  
56  
57  
58  
59  
60  
61  
62  
63  
64  
65
