# Supplementary material for: A chromosomal-level genome assembly for the giant African snail Achatina fulica
Source: PubMed Central journal article supplement (PMC6802634; doi:10.1093/gigascience/giz124), 2019-10-21
Supplement: giz124_giga-d-19-00006_revision_1.pdf [file giz124_giga-d-19-00006_revision_1.pdf]

## A chromosomal-level genome assembly for the giant African snail *Achatina fulica* --Manuscript Draft--

|                                                      |                                                                                                                                                                                                                                                                                                                                                                                                                                                                                                                                                                                                                                                                                                                                                                                                                                                                                                                                                                                                                                                                                                                                                                                                                                                                                                                                                                                                                                                                                                                                                                                                                                                                                                                                                                                                                                                                                                                                                                                                                                                                                                                                                                                                                                                               |              |
|------------------------------------------------------|---------------------------------------------------------------------------------------------------------------------------------------------------------------------------------------------------------------------------------------------------------------------------------------------------------------------------------------------------------------------------------------------------------------------------------------------------------------------------------------------------------------------------------------------------------------------------------------------------------------------------------------------------------------------------------------------------------------------------------------------------------------------------------------------------------------------------------------------------------------------------------------------------------------------------------------------------------------------------------------------------------------------------------------------------------------------------------------------------------------------------------------------------------------------------------------------------------------------------------------------------------------------------------------------------------------------------------------------------------------------------------------------------------------------------------------------------------------------------------------------------------------------------------------------------------------------------------------------------------------------------------------------------------------------------------------------------------------------------------------------------------------------------------------------------------------------------------------------------------------------------------------------------------------------------------------------------------------------------------------------------------------------------------------------------------------------------------------------------------------------------------------------------------------------------------------------------------------------------------------------------------------|--------------|
| <b>Manuscript Number:</b>                            | GIGA-D-19-00006R1                                                                                                                                                                                                                                                                                                                                                                                                                                                                                                                                                                                                                                                                                                                                                                                                                                                                                                                                                                                                                                                                                                                                                                                                                                                                                                                                                                                                                                                                                                                                                                                                                                                                                                                                                                                                                                                                                                                                                                                                                                                                                                                                                                                                                                             |              |
| <b>Full Title:</b>                                   | A chromosomal-level genome assembly for the giant African snail <i>Achatina fulica</i>                                                                                                                                                                                                                                                                                                                                                                                                                                                                                                                                                                                                                                                                                                                                                                                                                                                                                                                                                                                                                                                                                                                                                                                                                                                                                                                                                                                                                                                                                                                                                                                                                                                                                                                                                                                                                                                                                                                                                                                                                                                                                                                                                                        |              |
| <b>Article Type:</b>                                 | Data Note                                                                                                                                                                                                                                                                                                                                                                                                                                                                                                                                                                                                                                                                                                                                                                                                                                                                                                                                                                                                                                                                                                                                                                                                                                                                                                                                                                                                                                                                                                                                                                                                                                                                                                                                                                                                                                                                                                                                                                                                                                                                                                                                                                                                                                                     |              |
| <b>Funding Information:</b>                          | This work was supported by the National Key Research and Development Program of China (No. 2016YFC1200500 and 2016YFC1202000)                                                                                                                                                                                                                                                                                                                                                                                                                                                                                                                                                                                                                                                                                                                                                                                                                                                                                                                                                                                                                                                                                                                                                                                                                                                                                                                                                                                                                                                                                                                                                                                                                                                                                                                                                                                                                                                                                                                                                                                                                                                                                                                                 | Dr Ning Xiao |
| <b>Abstract:</b>                                     | <p><b>Background:</b><br/> <i>Achatina fulica</i> (<i>A. fulica</i>), also called the giant African snail, is the largest species in the reported terrestrial mollusks. Due to its voracious appetite, wide environmental adaptability, high growth rate and reproductive capacity, the species caused a world-wide invasion, mainly in Southeast Asia, Japan, the western Pacific islands and China. <i>A. fulica</i> is a pest that is able to damage agricultural crops, as well as an intermediate host of many parasites that can threaten human health. However, genomic information of <i>A. fulica</i> is still limited, hindering genetic and genomic studies with the aim to invasion control and management of the species.</p> <p><b>Finding:</b><br/> Using Kmer-based method, we estimated the <i>A. fulica</i> genome size to be 2.12 Gb with a high repeat content up to 71%. About 101.6 Gb genomic long-read data of <i>A. fulica</i> were generated from the PacBio sequencing platform and assembled to the first <i>A. fulica</i> genome of 1.85 Gb with a contig N50 length of 726 kb. Using contact information from the Hi-C sequencing data, we successfully anchored 99.32% contig sequences into 31 chromosomes, leading to the final contig and scaffold N50 length of 721 kb and 59.6 Mb, respectively. The continuity, completeness and accuracy were evaluated by genome comparison with other mollusk genomes, BUSCO assessment and genomic read mapping. 23,726 protein-coding genes were predicted from the assembled genome, among which 96.34% of the genes were functionally annotated. The phylogenetic analysis using whole-genome protein-coding genes revealed that <i>A. fulica</i> separated from the common ancestor with <i>Biomphalaria glabrata</i> around 182 million years ago.</p> <p><b>Conclusion:</b><br/> As our best knowledge, the <i>A. fulica</i> genome was the first terrestrial mollusk genome reported so far. The chromosome sequences of <i>A. fulica</i> will provide the research community a valuable resource for the population genetics and environmental adaptation studies for the species, and furthermore, for the chromosome level of evolution investigation within mollusks.</p> |              |
| <b>Corresponding Author:</b>                         | ning xiao<br><br>CHINA                                                                                                                                                                                                                                                                                                                                                                                                                                                                                                                                                                                                                                                                                                                                                                                                                                                                                                                                                                                                                                                                                                                                                                                                                                                                                                                                                                                                                                                                                                                                                                                                                                                                                                                                                                                                                                                                                                                                                                                                                                                                                                                                                                                                                                        |              |
| <b>Corresponding Author Secondary Information:</b>   |                                                                                                                                                                                                                                                                                                                                                                                                                                                                                                                                                                                                                                                                                                                                                                                                                                                                                                                                                                                                                                                                                                                                                                                                                                                                                                                                                                                                                                                                                                                                                                                                                                                                                                                                                                                                                                                                                                                                                                                                                                                                                                                                                                                                                                                               |              |
| <b>Corresponding Author's Institution:</b>           |                                                                                                                                                                                                                                                                                                                                                                                                                                                                                                                                                                                                                                                                                                                                                                                                                                                                                                                                                                                                                                                                                                                                                                                                                                                                                                                                                                                                                                                                                                                                                                                                                                                                                                                                                                                                                                                                                                                                                                                                                                                                                                                                                                                                                                                               |              |
| <b>Corresponding Author's Secondary Institution:</b> |                                                                                                                                                                                                                                                                                                                                                                                                                                                                                                                                                                                                                                                                                                                                                                                                                                                                                                                                                                                                                                                                                                                                                                                                                                                                                                                                                                                                                                                                                                                                                                                                                                                                                                                                                                                                                                                                                                                                                                                                                                                                                                                                                                                                                                                               |              |
| <b>First Author:</b>                                 | Yunhai Guo                                                                                                                                                                                                                                                                                                                                                                                                                                                                                                                                                                                                                                                                                                                                                                                                                                                                                                                                                                                                                                                                                                                                                                                                                                                                                                                                                                                                                                                                                                                                                                                                                                                                                                                                                                                                                                                                                                                                                                                                                                                                                                                                                                                                                                                    |              |
| <b>First Author Secondary Information:</b>           |                                                                                                                                                                                                                                                                                                                                                                                                                                                                                                                                                                                                                                                                                                                                                                                                                                                                                                                                                                                                                                                                                                                                                                                                                                                                                                                                                                                                                                                                                                                                                                                                                                                                                                                                                                                                                                                                                                                                                                                                                                                                                                                                                                                                                                                               |              |
| <b>Order of Authors:</b>                             | Yunhai Guo                                                                                                                                                                                                                                                                                                                                                                                                                                                                                                                                                                                                                                                                                                                                                                                                                                                                                                                                                                                                                                                                                                                                                                                                                                                                                                                                                                                                                                                                                                                                                                                                                                                                                                                                                                                                                                                                                                                                                                                                                                                                                                                                                                                                                                                    |              |
|                                                      | Yi Zhang                                                                                                                                                                                                                                                                                                                                                                                                                                                                                                                                                                                                                                                                                                                                                                                                                                                                                                                                                                                                                                                                                                                                                                                                                                                                                                                                                                                                                                                                                                                                                                                                                                                                                                                                                                                                                                                                                                                                                                                                                                                                                                                                                                                                                                                      |              |
|                                                      | Qin Liu                                                                                                                                                                                                                                                                                                                                                                                                                                                                                                                                                                                                                                                                                                                                                                                                                                                                                                                                                                                                                                                                                                                                                                                                                                                                                                                                                                                                                                                                                                                                                                                                                                                                                                                                                                                                                                                                                                                                                                                                                                                                                                                                                                                                                                                       |              |
|                                                      | Yun Huang                                                                                                                                                                                                                                                                                                                                                                                                                                                                                                                                                                                                                                                                                                                                                                                                                                                                                                                                                                                                                                                                                                                                                                                                                                                                                                                                                                                                                                                                                                                                                                                                                                                                                                                                                                                                                                                                                                                                                                                                                                                                                                                                                                                                                                                     |              |

|                                                |                                                                                                                                                                                                                                                                                                                                                                                                                                                                                                                                                                                                                                                                                                                                                                                                                                                                                                                                                                                                                                                                                                                                                                                                                                                                                                                                                                                                                                                                                                                                                                                                                                                                                                                                                                                                                                                                                                                                                                                                                                                                                                                                                                                                                                                                                                                                                                                                                                                                                                                                                                                                                                                                                                                                                                                                                                                                                                                                                                                                                                                                                                                                                                                         |
|------------------------------------------------|-----------------------------------------------------------------------------------------------------------------------------------------------------------------------------------------------------------------------------------------------------------------------------------------------------------------------------------------------------------------------------------------------------------------------------------------------------------------------------------------------------------------------------------------------------------------------------------------------------------------------------------------------------------------------------------------------------------------------------------------------------------------------------------------------------------------------------------------------------------------------------------------------------------------------------------------------------------------------------------------------------------------------------------------------------------------------------------------------------------------------------------------------------------------------------------------------------------------------------------------------------------------------------------------------------------------------------------------------------------------------------------------------------------------------------------------------------------------------------------------------------------------------------------------------------------------------------------------------------------------------------------------------------------------------------------------------------------------------------------------------------------------------------------------------------------------------------------------------------------------------------------------------------------------------------------------------------------------------------------------------------------------------------------------------------------------------------------------------------------------------------------------------------------------------------------------------------------------------------------------------------------------------------------------------------------------------------------------------------------------------------------------------------------------------------------------------------------------------------------------------------------------------------------------------------------------------------------------------------------------------------------------------------------------------------------------------------------------------------------------------------------------------------------------------------------------------------------------------------------------------------------------------------------------------------------------------------------------------------------------------------------------------------------------------------------------------------------------------------------------------------------------------------------------------------------------|
|                                                | Guangyao Mao                                                                                                                                                                                                                                                                                                                                                                                                                                                                                                                                                                                                                                                                                                                                                                                                                                                                                                                                                                                                                                                                                                                                                                                                                                                                                                                                                                                                                                                                                                                                                                                                                                                                                                                                                                                                                                                                                                                                                                                                                                                                                                                                                                                                                                                                                                                                                                                                                                                                                                                                                                                                                                                                                                                                                                                                                                                                                                                                                                                                                                                                                                                                                                            |
|                                                | Zhiyuan Yue                                                                                                                                                                                                                                                                                                                                                                                                                                                                                                                                                                                                                                                                                                                                                                                                                                                                                                                                                                                                                                                                                                                                                                                                                                                                                                                                                                                                                                                                                                                                                                                                                                                                                                                                                                                                                                                                                                                                                                                                                                                                                                                                                                                                                                                                                                                                                                                                                                                                                                                                                                                                                                                                                                                                                                                                                                                                                                                                                                                                                                                                                                                                                                             |
|                                                | Eniola M. Abe                                                                                                                                                                                                                                                                                                                                                                                                                                                                                                                                                                                                                                                                                                                                                                                                                                                                                                                                                                                                                                                                                                                                                                                                                                                                                                                                                                                                                                                                                                                                                                                                                                                                                                                                                                                                                                                                                                                                                                                                                                                                                                                                                                                                                                                                                                                                                                                                                                                                                                                                                                                                                                                                                                                                                                                                                                                                                                                                                                                                                                                                                                                                                                           |
|                                                | Jian Li                                                                                                                                                                                                                                                                                                                                                                                                                                                                                                                                                                                                                                                                                                                                                                                                                                                                                                                                                                                                                                                                                                                                                                                                                                                                                                                                                                                                                                                                                                                                                                                                                                                                                                                                                                                                                                                                                                                                                                                                                                                                                                                                                                                                                                                                                                                                                                                                                                                                                                                                                                                                                                                                                                                                                                                                                                                                                                                                                                                                                                                                                                                                                                                 |
|                                                | Zhongdao Wu                                                                                                                                                                                                                                                                                                                                                                                                                                                                                                                                                                                                                                                                                                                                                                                                                                                                                                                                                                                                                                                                                                                                                                                                                                                                                                                                                                                                                                                                                                                                                                                                                                                                                                                                                                                                                                                                                                                                                                                                                                                                                                                                                                                                                                                                                                                                                                                                                                                                                                                                                                                                                                                                                                                                                                                                                                                                                                                                                                                                                                                                                                                                                                             |
|                                                | Shizhu Li                                                                                                                                                                                                                                                                                                                                                                                                                                                                                                                                                                                                                                                                                                                                                                                                                                                                                                                                                                                                                                                                                                                                                                                                                                                                                                                                                                                                                                                                                                                                                                                                                                                                                                                                                                                                                                                                                                                                                                                                                                                                                                                                                                                                                                                                                                                                                                                                                                                                                                                                                                                                                                                                                                                                                                                                                                                                                                                                                                                                                                                                                                                                                                               |
|                                                | Xiaonong Zhou                                                                                                                                                                                                                                                                                                                                                                                                                                                                                                                                                                                                                                                                                                                                                                                                                                                                                                                                                                                                                                                                                                                                                                                                                                                                                                                                                                                                                                                                                                                                                                                                                                                                                                                                                                                                                                                                                                                                                                                                                                                                                                                                                                                                                                                                                                                                                                                                                                                                                                                                                                                                                                                                                                                                                                                                                                                                                                                                                                                                                                                                                                                                                                           |
|                                                | Wei Hu                                                                                                                                                                                                                                                                                                                                                                                                                                                                                                                                                                                                                                                                                                                                                                                                                                                                                                                                                                                                                                                                                                                                                                                                                                                                                                                                                                                                                                                                                                                                                                                                                                                                                                                                                                                                                                                                                                                                                                                                                                                                                                                                                                                                                                                                                                                                                                                                                                                                                                                                                                                                                                                                                                                                                                                                                                                                                                                                                                                                                                                                                                                                                                                  |
|                                                | Ning Xiao                                                                                                                                                                                                                                                                                                                                                                                                                                                                                                                                                                                                                                                                                                                                                                                                                                                                                                                                                                                                                                                                                                                                                                                                                                                                                                                                                                                                                                                                                                                                                                                                                                                                                                                                                                                                                                                                                                                                                                                                                                                                                                                                                                                                                                                                                                                                                                                                                                                                                                                                                                                                                                                                                                                                                                                                                                                                                                                                                                                                                                                                                                                                                                               |
| <b>Order of Authors Secondary Information:</b> |                                                                                                                                                                                                                                                                                                                                                                                                                                                                                                                                                                                                                                                                                                                                                                                                                                                                                                                                                                                                                                                                                                                                                                                                                                                                                                                                                                                                                                                                                                                                                                                                                                                                                                                                                                                                                                                                                                                                                                                                                                                                                                                                                                                                                                                                                                                                                                                                                                                                                                                                                                                                                                                                                                                                                                                                                                                                                                                                                                                                                                                                                                                                                                                         |
| <b>Response to Reviewers:</b>                  | <p>Reviewer reports:</p> <p>Reviewer #1: In this study the authors sequenced the genome of the giant African snail <i>Achatina fulica</i> using short and long read technologies as well as a Hi-C scaffolding method, and succeeded to develop chromosomal-level genome assembly. I think the data will contribute to our understanding of the biology of the species.<br/> Reply: We thanks a lot for the reviewer's positive comments for our manuscript.</p> <p>At the same time I found description of methods is not sufficient in the present manuscript, therefore it should be revised before publication.<br/> In the Introduction the authors mentioned that it is important to study the biology of <i>A. chatina</i> because the species is one of the most threatening invasive species, and is the intermediate host of <i>Angiostrongylus</i>. However, I could not find how the present chromosomal-level genome assembly is useful to address these issues. I would like to request the authors to discuss the point more specifically. This will emphasize the importance of the study.<br/> Reply: Thanks a lot for the suggestion. The chromosome genome of <i>A. chatina</i> could provide an important framework in the following population genetics using next-generation sequencing data. Meanwhile, the predicted genes in the genome of <i>A. chatina</i> could be used for the transcriptome analysis for the interaction of <i>Angiostrongylus</i> and <i>A. chatina</i>. We have added the information into the revised manuscript. (lines 85-91 in the revised ms)</p> <p>The information about transcriptome is absent despite the data might be used for gene model prediction (lines 206-207). The authors should describe in detail about the transcriptome. For example, from which tissues was RNA extracted? How was the quality of the RNA? How was the stats of RNA-Seq (number of reads, average length, etc.)? In addition, mapping rate of the transcriptome to the genome assembly and gene models will be informative to evaluate the completeness of the assembly and model prediction, respectively.<br/> Reply: Thanks for the reviewer's reminding. The detailed information for the RNA sequencing has been added in the revised manuscript. (lines 106-124 in the revised ms)</p> <p>Lines 178-180<br/> High rate of heterozygosity (&gt;1%) have been reported in bivalve genomes (oysters, scallops, etc.) but not the case in gastropods.<br/> Reply: Thanks for the reviewer's reminding. Previous genome study of <i>Pomacea canaliculata</i>, belonging to gastropods, revealed the high heterozygosity among 1%-2%. (doi: 10.1093/gigascience/giy101) To avoid the confusion, we have deleted the sentence in the manuscript.</p> <p>Fig. 3<br/> I would suggest to show the genome assembly comparison data in a table, not in a scatter plot.<br/> In general, scatter plot is used to see the correlation between two variables. This figure is not adequate to compare genome assemblies because 1) correlation between contig and scaffold N50s is not meaningful 2) most of the dots are put at the lower left and</p> |

indistinguishable.

In addition, references should be cited when the authors used these genome data in the study.

Reply: Thanks a lot for the suggestion. We have changed the Figure 3 into Table 3 and added the references in the revised manuscript.

Lines 232-235, Fig. 5

What kinds of fossil record were used for molecular clock calibration? Honestly speaking, I cannot believe the result (Fig.5), showing Spiralia diverged from Ecdysozoa 831 Mya (200 million years before the Ediacaran Period).

Reply: Thank you very much for the reminding. However, we re-estimated the divergence time among these species using the records for Protostomia and Mollusca downloaded from [www.timetree.org](http://www.timetree.org) and obtained the similar results (the figure below was downloaded from the place). Thus we believe the results might be reliable. The new results and the calibration information were updated in the revised ms. (lines 258-261 and fig 5)

Version information of all software used are needed.

Reply: Thank you very much for the reminding. All the version information available has been added in the revised ms.

Reviewer #2: Please see attached Review.

Overall, this appears to be a well put together genome encompassing large amounts of data from different sources, including long reads from PacBio and additional scaffolding from Hi-C. It is quite well presented and I'm sure this work will be useful to the community as a genomics resource. Nonetheless there are a few issues that I'd like to see resolved before the manuscript can be accepted for publication or the assembly is released into the public repositories.

Major comments

Contamination. There is no mention in the text of filters for possible contamination from non-target organisms in the sequencing data. I consider such an analysis to be a vital and necessary component of any genome project, to eliminate (as much as possible) errors from contaminating sequencing reads in sequence databases. Tools such as Blobtools (<https://drl.github.io/blobtools/>) are easy to implement and are highly informative as to the quality of the raw data and the final genome.

Reply: Thanks for the reviewer's reminding. Actually we did the contamination analysis at the step Survey since the DNA samples in Survey and Assembly was identical. In the survey step, we randomly extracted 10,000 pairs of short reads, and compared them to the nt database, and find no obvious external contamination from other species. This method has been described elsewhere (<https://doi.org/10.1016/j.molp.2014.12.011>) and we did not mention it since it performed as expected. The result of contamination analysis has been added in the revised ms (lines 154-155 in the revised ms).

Kmer analysis. There is much discussion about estimation of genome size from kmer analysis, but there is no kmer spectra presented. I would find this figure much more informative and useful than some of the figures that are included (e.g. 2 and 3).

Reply: Thank you very much for your suggestions. The kmer spectra has been added in the revised version (Figure 2).

Heterozygosity. Related to the above point: how did the authors resolve any regions containing heterozygous sites in the assembly? E.g., divergent allelic regions that might be co-assembled and both present in the final scaffolds?

Reply: Thank you very much for you reminding. By mapping the subreads back to the genome, we estimated the sequencing depth for each region of the assembly and the results were shown below (the GC content were also shown, 10k window). It shows that the distribution of the depth is unimodal, which means that almost all sites were homozygous, actually the heterozygosity of the species is not very high (<0.5%). And if there are too much divergent allelic regions, two peaks will be obvious.

-

Transcriptome / RNA-seq. Table 1 shows 22.5Gb of transcriptomic reads but very little information is given about these data. How they were generated and filtered, and then how they were used during the annotation process needs more details.

Reply: Thank you very much for your reminding. The information has been added in the revised version (lines 106-124, line 229 in the revised ms).

Language. Overall the manuscript is well written, but there were many cases of grammatical errors and/or small typos, too many to catch them all in the minor comments below (I mostly stopped after the abstract). Thus, the manuscript would benefit from a proof-read to correct these small mistakes in English, it would not be a big task.

Reply: Thank you very much for your reminding. We corrected errors and typos thorough the manuscript in the revised version.

Finally, what is the criteria for “chromosome level assembly”, a description that is used throughout the manuscript for their genome? I find it a bit puzzling that the final assembly has ~1000 scaffolds (~8000 contgs) and is described as chromosome level, but we are told there are 31 chromosomes for this species. By all accounts the authors have done a good job with such a large and repeat-rich genome, but to call it chromosome level is perhaps a bit misleading.

Reply: Thank you very much for your reminding. At last, based on the Hic technology, more than 99% of the total length were reliably anchored, ordered and orientated on the 31 chromosomes using Lachesis, and result in a scaffold N50 of 59.59 Mb of the assembly. This is comparable to the size of the chromosome, thus we call it chromosome level.

Minor comments

Line 28: “also called THE giant African snail...”

Reply: We have added the “the” in the revised ms.

Line 29 and elsewhere: the word “greedy” is a bit casual; suggest to use “extensive”, “voracious” or other synonym

Reply: We have changed it into “voracious”.

Line 30: “reproductIVE capacity”

Reply: We have corrected the mistake.

Line 30: “caused A world-wide...”

Reply: We have added the “a” in the revised version.

Line 32: “a pest THAT IS ABLE TO damage the agricultural crops”

Reply: We have corrected it according to your instructions.

Line 33: “many parasites THAT CAN threaten”

Reply: We have corrected it according to your instructions.

Line 34: “hindering the genetic”

Reply: We have deleted the “the” in the revised ms.

Line 37: “genome size TO BE 2.12 Gb”

Reply: We have changed it into “to be” in the revised ms.

Line 52: sentence has numerous grammatical errors, please rewrite.

Reply: We have rewritten it in the revised ms.

Line 66: “direct or indirect” – which is it?

Reply: We have changed it into “direct and indirect”, which means both.

Line 71: the link provided is in Chinese and is difficult to navigate to the aforementioned list of invasive species

Reply: We apologize for the inconvenience, however, there is no English version for the list and we have marked the link as “in Chinese”.

Line 75: mention what kind of animal *Angiostrongylcantonensis* is, e.g. “In addition, *A. fulica* is also the intermediate host of THE PARASITIC NEMATODE *Angiostrongylcantonensis*”

Reply: We have changed it in the revised ms.

Line 83: "...considered to be one of the most serious threat and a destructive terrestrial gastropod..."

Reply: We have deleted it in the revised ms.

Line 87: "molecular mechanismS UNDERLYINGinvestigations for its broad environmental adaptability"

Reply: We have corrected it in the revised ms.

Line 93: why these tissues specifically?

Reply: These tissues were used for DNA extraction and subsequent high-throughput sequencing, they were selected since these tissues were not easy to be contaminated by exogenous DNA from other species and the relatively high quantity of DNA.

Line 123: how does this estimate of heterozygosity (0.47%) compare to other mollusks?

Reply: High rate of heterozygosity (>1%) have been reported in bivalve genomes, and a previous genome study of *Pomacea canaliculata* revealed a high heterozygosity of 1%-2%. Thus a heterozygosity of 0.47% may be much lower than other molluscs.

Line 127: "provided additional supporting data for the statically STATISTICAL analysis"

Reply: We have corrected it in the revised ms.

Line 127: what statistical analysis is being referred to here?

Reply: It means the statistical analysis mentioned in the previous sentence, the correlation between repeat content and genome size.

Line 153: "pairsthat WITH both ends uniquely mapped"

Reply: We have corrected it in the revised ms.

Line 155: "StartNearRsite", "ExtremeFragments" etc – the detail is good but some of these parameters could be explained to tell readers what filtering was performed and why

Reply: These are parameters regarding invalid read pairs defined by hiclib and can be filtered with default settings. Actually these parameters have been used extensively (<https://doi.org/10.1093/molbev/msw108>, <https://doi.org/10.1093/gigascience/giy120>). The details are as follows:

ExtremeFragments: removes fragments with most and/or least # counts (the top 0.005 and bottom 0 were removed)

-StartNearRsite:Removes reads that start within x bp near rsite (5 bp near the rsite)

-LargeSmallFragments: removes very large and small fragments (100bp- 100000bp were retained)

Line 159: "had" -> "has"

Reply: We have corrected it in the revised ms.

Line 169: how many scaffolds? From Table 2 there are ~1000, which is way more that 31 expected number of chromosomes, so I suppose "chromosomal level" is a bit misleading? "near chromosomal level" might be more accurate

Reply: We have corrected it according to your instructions in the revised ms.

Line 186: which BUSCO gene set was used here?

Reply: We used the metazoa\_odb9, and it has been added in the revised ms (line 210).

Line 188: so ~15% of detected BUSCO genes were found in multiple copy; is this a reflection of unresolved heterozygosity, or genuine gene duplications / paralogs? If the former, what has been done to remove these uncollapsed regions from the assembly? For example, their inclusion might upwardly bias the total assembly size or number of genes

Reply: Thank you very much for your reminding. The possibility can not be ruled out. However, as mentioned above, the sequencing depth shows that almost all regions of the assembly are homozygous, together with the fact that we used metazoa\_odb9 as reference, we suspect that the detected multiple copy should be genuine gene

duplications / paralogs because of lineage-specific duplication. Moreover, a number of published genomes like *Sillago sinica*, *Protosalanx hyalocranium*, etc, detected multiple copy of BUSCO genes, which should be lineage-specific duplications, too.

Line 192: "From the NGS reads alignment, we detected 128,998 homologous SNP loci using the GATK pipeline, demonstrating the high base-level accuracy of 99.33%." I don't understand this statement: how does variant calling demonstrate a high base-level accuracy? What exactly does the 99.33% pertain to? How is "base-level" accuracy defined?

Reply: Thank you very for your reminding. The "homologous" should be "homozygous" and we are very sorry for the mistake. Generally, homozygous SNP means assembly error and heterozygous SNP means the assembly maybe right, and it has been used in many genome projects like *Sillago sinica*, *Glyptosternon maculatum*, etc, although the theory is not too serious. To avoid the confusion, we have deleted the sequence in the revised ms.

Line 197: RepeatModeler

Reply: We have corrected it in the revised ms.

Line 200: "All repetitive elements were masked in the genome for the BEFORE protein-coding gene prediction"

Reply: We have corrected it in the revised ms.

Line 206: "Full-length transcripts WERE obtained using Iso-Seq were mapped to the genome using Genewise" Also this sentence is slightly confusing – is Iso-Seq a tool that has generated 'transcripts' from the TBLASTN results in the previous sentence? I did not see any mention of RNA-seq data in the text, but there is some mentioned in Table 2. Please explain in more detail.

Reply: Iso-Seq is a technology and its full name is "isoform-sequencing", which can generate "full-length" isoforms of the transcripts from the same gene locus, and the details have been added in the revised ms. (lines 106-124 in the revised ms)

Line 221: *Drosophila melanogaster* is not a mollusc...

Reply: *Drosophila melanogaster* is used as an outgroup here and we corrected the mistake in the revised ms (lines 245-246 in the revised ms).

Line 223: "Only proteins from the longest transcript were used for genes with alternative splices ISOFORMS"

Reply: We have corrected it in the revised ms.

Line 234: is this phylogenetic relationship unexpected?

Reply: The relationship (*Aplysia californica*, (*Achatina fulica*, *Biomphalaria glabrata*)) is supported by a paper published in THE NAUTILUS (Title: On the phylogenetic relationships of the genus *Mexistrophia* and of the family *Cerionidae* (Gastropoda: Eupulmonata),

<https://repository.si.edu/bitstream/handle/10088/27780/Harasewych%20et%20al.%202015.pdf?sequence=1&isAllowed=y>), and the relationship between other species is in accord with a paper published in Gigascience (Title: The genome of the golden apple snail *Pomacea canaliculata* provides insight into stress tolerance and invasive adaptation, <https://doi.org/10.1093/gigascience/giy101>).

Line 243: "We annotated PREDICTED 23,726 protein-coding genes in the *A. fulica* genome and 22,858 of genes were annotated WITH PUTATIVE FUNCTIONS."

Functions based on sequence similarity, BLAST etc are of course putative

Reply: We have corrected it in the revised ms.

Table 2: what do the asterisks\*\* represent?

Reply: It means the ultimate contigs since they were probably changed during the Hic step. We have added the statement in the revised ms.

Figure 1: "Figure 1. A picture of *A. fulica* that INDIVIDUAL used for genome sequencing and assembly"

Reply: We have corrected it in the revised ms.

Figure 2: I struggle to extract anything useful from this figure, but I am not familiar with Hi-C data so maybe it's just me

Reply: The assumption of Hic is that the crosslinking signals are more strong as the loci located in a chromosome are more closer. Thus ideally the contact matrix should be around the diagonal line, just as is shown in the figure (figure3 in the revise ms).

Figure 3: Again, I'm not convinced this figure is very informative, as it currently is. For example, the majority of (unlabelled) points all overlap somewhere near the X-Y intercept, with only three outwith this cluster. Then the size of the points and their colour appear to convey the same information – why twice? I think the point of the figure is to demonstrate the high contiguity of *A. fulica* genome compared to other mollusk genomes, but does plotting scaffold N50 versus contig N50 really achieve this? Better would be to plot cumulative assembly span curves, i.e. number of scaffolds on X vs cumulative span on Y

Reply: Thank you very much for your suggestions. We have deleted the figure and listed these parameters such as scaffold N50 and contig N50 in Table 3 for comparison in the revised ms.

Figure 4: It is interesting that exon length is so conserved, but intron lengths are much more variable. Is there any evidence that intron lengths are bimodally distributed?

Reply: Bimodal distribution of the intron lengths was rarely reported. It is not surprise that the intron lengths is more variable than exon since the latter one is much more conservative than the former.

Reviewer #3: I thank the authors for the work presented on the manuscript "A chromosomal-level genome assembly for the giant African snail *Achatina fulica*". It is a great contribution for future studies of mollusk genomics and for the study of the molecular basis of invasiveness. I just have a few recommendations and comments.

1-) I would like to see the kmer distribution plot presented on the manuscript. It helps future researchers to understand the composition of this mollusk genome, and to plan future projects.

Reply: Thank you very much for your suggestions. In the revised ms, we have added the kmer spectra as Figure 2.

2-) On lines 133-137: Canu and Falcon are both good assemblers generating high quality data. After deciding to move forward with the Falcon assembly, I would like to know why the authors have decided not to run FALCON-Unzip on the assembly? The phasing of haplotypes has been shown to help avoid assembly errors in genomic areas of complex structural variation between haplotypes. Even though the further analysis (mapping quality, etc) show the assembled genome to be in good shape, it would be a good standard practice to run Falcon-Unzip before HiC scaffolding.

Reply: Thank you very much for your suggestions and we strongly agree with you. We believe that using Falcon-Unzip will generate a high-quality genome, especially the heterozygosity of the species is very high (>1% for example). However, we used FALCON here by considering that the heterozygosity of the species is not very high (0.47%).

3-) After Lanchesis, around 1000 contigs were not placed into chromosomes. Have you investigated the composition of such contigs? Can you present also the size distribution of them?

Reply: Thank you very much for your suggestions. We found that the average gene length is much shorter for contigs unanchored to chromosomes than the anchored ones (67.6 bp/kb vs 341.5 bp/kb), whereas the average length of repeat length is just the reverse. Out of the 1467 unanchored contigs, a total of 210 are longer than 10kb, with the longest one is 6,839 kb. And the size distribution of the unanchored contigs short than 10 kb is as follows:

4-) The sequencing of the transcriptome with IsoSeq technology was only briefly mentioned. Could you describe the evaluation of such transcripts in a few lines? For example, was it possible to find full-length transcripts sequenced?

Reply: Thank you very much for your suggestions. In this study, a number of 553,889 Full-length Non-chimeric sequences (FLNC) representing 23,726 gene loci were obtained. However, the 5' end of the mRNA might be degraded before sequencing and

|                                                                                                                                                                                                                                                                                                                                                                                                                                                                                                                                     |                                                                                                                                                                                                                                                                                                                                                                                                                                                                                                                                                                                                                                               |
|-------------------------------------------------------------------------------------------------------------------------------------------------------------------------------------------------------------------------------------------------------------------------------------------------------------------------------------------------------------------------------------------------------------------------------------------------------------------------------------------------------------------------------------|-----------------------------------------------------------------------------------------------------------------------------------------------------------------------------------------------------------------------------------------------------------------------------------------------------------------------------------------------------------------------------------------------------------------------------------------------------------------------------------------------------------------------------------------------------------------------------------------------------------------------------------------------|
|                                                                                                                                                                                                                                                                                                                                                                                                                                                                                                                                     | <p>we could not detect it as we did for the 3' end since a polyA tail is a sign of completeness for the latter one. To evaluate the completeness of the isoforms, we compared them to the predicted mRNAs from genome sequences and found that 70.37% of the multi-exon FLNCs were really full-length sequences. ((lines 106-124 in the revised ms))</p> <p>5-) Finally, just a last read to review the English would be advised. Two examples of misspelling: The tittle on line 409. And 'fro' on line 223.</p> <p>Reply: Thank you very much for your reminding. We hope that all mistakes have been corrected in the revised version.</p> |
| <b>Additional Information:</b>                                                                                                                                                                                                                                                                                                                                                                                                                                                                                                      |                                                                                                                                                                                                                                                                                                                                                                                                                                                                                                                                                                                                                                               |
| <b>Question</b>                                                                                                                                                                                                                                                                                                                                                                                                                                                                                                                     | <b>Response</b>                                                                                                                                                                                                                                                                                                                                                                                                                                                                                                                                                                                                                               |
| Are you submitting this manuscript to a special series or article collection?                                                                                                                                                                                                                                                                                                                                                                                                                                                       | No                                                                                                                                                                                                                                                                                                                                                                                                                                                                                                                                                                                                                                            |
| <p><b>Experimental design and statistics</b></p> <p>Full details of the experimental design and statistical methods used should be given in the Methods section, as detailed in our <a href="#">Minimum Standards Reporting Checklist</a>. Information essential to interpreting the data presented should be made available in the figure legends.</p> <p>Have you included all the information requested in your manuscript?</p>                                                                                                  | Yes                                                                                                                                                                                                                                                                                                                                                                                                                                                                                                                                                                                                                                           |
| <p><b>Resources</b></p> <p>A description of all resources used, including antibodies, cell lines, animals and software tools, with enough information to allow them to be uniquely identified, should be included in the Methods section. Authors are strongly encouraged to cite <a href="#">Research Resource Identifiers</a> (RRIDs) for antibodies, model organisms and tools, where possible.</p> <p>Have you included the information requested as detailed in our <a href="#">Minimum Standards Reporting Checklist</a>?</p> | Yes                                                                                                                                                                                                                                                                                                                                                                                                                                                                                                                                                                                                                                           |
| <p><b>Availability of data and materials</b></p> <p>All datasets and code on which the</p>                                                                                                                                                                                                                                                                                                                                                                                                                                          | Yes                                                                                                                                                                                                                                                                                                                                                                                                                                                                                                                                                                                                                                           |



conclusions of the paper rely must be either included in your submission or deposited in [publicly available repositories](#) (where available and ethically appropriate), referencing such data using a unique identifier in the references and in the “Availability of Data and Materials” section of your manuscript.

Have you have met the above requirement as detailed in our [Minimum Standards Reporting Checklist](#)?

[Click here to view linked References](#)

1 **A chromosomal-level genome assembly for the giant**  
2 **African snail *Achatina fulica***

3

4 Guo Yunhai<sup>1, #</sup>, Zhang Yi<sup>1, #</sup>, Liu Qin<sup>1</sup>, Huang Yun<sup>1</sup>, Mao Guangyao<sup>1</sup>, Yue  
5 Zhiyuan<sup>1</sup>, Eniola M. Abe<sup>1</sup>, Li Jian<sup>2</sup>, Wu Zhongdao<sup>3</sup>, Li Shizhu<sup>1</sup>, Zhou Xiaonong<sup>1</sup>,  
6 Hu Wei<sup>1,2,\*</sup>, Xiao Ning<sup>1,\*</sup>

7

8 <sup>1</sup> Key Laboratory of Parasite and Vector Biology of MOH, WHO Cooperation Center for  
9 Tropical Diseases, Joint Research Laboratory of Genetics and Ecology on Parasite-host  
10 Interaction, Chinese Center for Disease Control and Prevention & Fudan University,  
11 National Institute of Parasitic Diseases, Chinese Center for Diseases Control and  
12 Prevention, Shanghai 200025, China

13 <sup>2</sup> State Key Laboratory of Genetic Engineering, Ministry of Education Key Laboratory of  
14 Contemporary Anthropology, Department of Microbiology and Microbial Engineering,  
15 School of Life Science, Fudan University, Shanghai 200433, China

16 <sup>3</sup> Department of Parasitology, Zhongshan School of Medicine, Sun Yat-sen University,  
17 Guangzhou 510080, China

18

19

20

21

22

23

24

25

26 **Abstract**

27 **Background:**

28 *Achatina fulica* (*A. fulica*), also called the giant African snail, is the largest species in  
29 the reported terrestrial mollusks. Due to its voracious appetite, wide environmental  
30 adaptability, high growth rate and reproductive capacity, the species caused a  
31 world-wide invasion, mainly in Southeast Asia, Japan, the western Pacific islands and  
32 China. *A. fulica* is a pest that is able to damage agricultural crops, as well as an  
33 intermediate host of many parasites that can threaten human health. However,  
34 genomic information of *A. fulica* is still limited, hindering genetic and genomic studies  
35 with the aim to invasion control and management of the species.

36 **Finding:**

37 Using *K*mer-based method, we estimated the *A. fulica* genome size to be 2.12 Gb  
38 with a high repeat content up to 71%. About 101.6 Gb genomic long-read data of *A.*  
39 *fulica* were generated from the PacBio sequencing platform and assembled to the first  
40 *A. fulica* genome of 1.85 Gb with a contig N50 length of 726 kb. Using contact  
41 information from the Hi-C sequencing data, we successfully anchored 99.32% contig  
42 sequences into 31 chromosomes, leading to the final contig and scaffold N50 length  
43 of 721 kb and 59.6 Mb, respectively. The continuity, completeness and accuracy were  
44 evaluated by genome comparison with other mollusk genomes, BUSCO assessment  
45 and genomic read mapping. 23,726 protein-coding genes were predicted from the  
46 assembled genome, among which 96.34% of the genes were functionally annotated.  
47 The phylogenetic analysis using whole-genome protein-coding genes revealed that *A.*  
48 *fulica* separated from the common ancestor with *Biomphalaria glabrata* around 182  
49 million years ago.

50 **Conclusion:**

51 As our best knowledge, the *A. fulica* genome was the first terrestrial mollusk genome  
52 reported so far. The chromosome sequences of *A. fulica* will provide the research  
53 community a valuable resource for the population genetics and environmental  
54 adaptation studies for the species, and furthermore, for the chromosome level of  
55 evolution investigation within mollusks.

56

57

58 **Key Words:** Giant African snail, *Achatina fulica*, PacBio, Hi-C, chromosome  
59 assembly

## 60 **Data description**

## 61 **Introduction**

62 The giant African snail, *A. fulica*, is a Gastropod species (**Figure 1**). It is the largest  
63 terrestrial mollusks with voracious appetite, strong environmental adaptability, and  
64 high growth and reproduction rate[1-3]. Originating from East Africa, *A. fulica*  
65 gradually invaded Southeast Asia, Japan and the western Pacific islands in the last  
66 century[4-6] with the direct and indirect help from humans[7-9]. In mainland China, the  
67 first *A. fulica* invasion event was reported in 1931[10]. At present, the snail's natural  
68 distribution in the wild has been found in Guangdong, Hainan, Guangxi, southern  
69 parts of Yunnan Province and Fujian Province, and a county of Guizhou Province[11].  
70 *A. fulica* was included as the first 16 alien invasive species in China  
71 ([http://www.mee.gov.cn/gkml/zj/wj/200910/t20091022\\_172155.htm](http://www.mee.gov.cn/gkml/zj/wj/200910/t20091022_172155.htm), in Chinese) in  
72 2003, and was also listed by International Union for Conservation of Nature (IUCN) as  
73 the 100 most threatening alien invasive species[12]. This snail has been recognized  
74 as an agricultural and garden pest that has caused significant damages in both  
75 tropical and subtropical regions[9, 12, 13]. In addition, *A. fulica* is also the  
76 intermediate host of the parasitic nematode *Angiostrongyl cantonensis*. Human  
77 infection with angiostrongyliasis, which occurs mainly through consumption of snails  
78 carrying *A. cantonensis* larvae, causes eosinophilic meningoencephalitis[4, 11, 14-18].  
79 As a consequence, *A. fulica* is attracting more and more attention in fields of both  
80 agricultural crops protection and human disease control.

81 To date, a variety of mollusk genomes have been analyzed and published,  
82 including two freshwater gastropods snails *Pomacea canaliculata*[19] and  
83 *Biomphalaria glabrata*[20]. However, no genome has been reported for terrestrial  
84 mollusks. *A. fulica* is considered to be a destructive terrestrial gastropod which poses  
85 a significant hazard to agriculture, the environment, biodiversity and human health. A  
86 chromosome genome of *A. chatina* could provide crucial resources in the population

87 genetics and evolution studies based on genomic sequencing data aiming to discover  
88 the invasion and adaptation history of *A. chatina*. Meanwhile, the genome could also  
89 be used to probe gene expression during the important biological processes, such as  
90 gene expression patterns in various developmental stages and the interaction of  
91 *Angiostrongylus* and *A. chatina*. In this work, we applied Illumina, PacBio and Hi-C  
92 techniques to construct the chromosome of *A. fulica*. The genome is the first  
93 terrestrial mollusk genome, providing an important reference for the molecular  
94 mechanisms underlying its broad environmental adaptability and the development of  
95 control strategy of the world-wide invasion.

## 96 **Sample and sequencing**

97 An adult snail (**Figure 1**), which was collected in Pingxiang city, Guangxi Autonomous  
98 Region, was used for reference genome construction. The snail was dissected and  
99 abdominal foot (17.4 g) and liver pancreas (40.4 g) tissues were collected and quickly  
100 frozen in liquid nitrogen overnight before transferring to -80 °C for storage. DNA was  
101 extracted using the traditional phenol/chloroform extraction method and was quality  
102 checked using agarose gel electrophoresis, meeting the requirement for library  
103 construction for the Illumina X Ten (Illumina Inc., San Diego, CA, USA) and for the  
104 PacBio Sequel (Pacific Biosciences of California, Menlo Park, CA, USA) sequencing  
105 platforms.

106 RNA was extracted from the pallium, liver, foot, spleen, stomach, gut, heart using  
107 TRIZOL reagents. The RNA quality was checked using the Nanodrop ND-1000  
108 spectrophotometer (LabTech, USA) and 2100 Bioanalyzer (Agilent Technologies,  
109 USA) with RNA integrity number of 8. The RNA from each samples were equally  
110 mixed for the RNA sequencing on PacBio Sequel platform. Firstly, mRNA molecules  
111 were reversely transcribed to cDNA using Clontech SMARTer cDNA synthesis kit.  
112 After cDNA amplification and purification, two SMRTbell libraries of 0-4 kb and 4-10  
113 kb were generated using the size selection in BluePippin Size Selection System

114 (Pacific Biosciences of California, Menlo Park, CA, USA) and protocols suggested by  
115 manufacturer. The finale libraries were sequenced in the PacBio SEQUEL platform  
116 (Pacific Biosciences of California, Menlo Park, CA, USA), resulting 12,439,996  
117 subreads totaling about 22.5 Gb PacBio long reads with average length longer than  
118 1,801 bps. Subsequently, a total of 782,613 circular consensus sequences (CCS)  
119 were generated based on the subreads, and a number of 553,889 Full-length  
120 Non-chimeric sequences (FLNC) representing 23,726 gene loci were obtained,  
121 eventually. All aforementioned data processing were performed using SMRT Link  
122 v5.0 ([www.pacb.com](http://www.pacb.com)). Moreover, about 70.37% of the multi-exon FLNCs were really  
123 full-length sequences embracing all the exons of the gene locus predicted from the  
124 whole genome sequences.

125 Using the DNA molecules from abdominal foot, a library with the insertion length  
126 of 300 bp were constructed and sequenced for Illumina sequencing platform  
127 according to the manufacturer's protocol. About 202.23 Gb short reads were obtained  
128 from the Illumina X Ten sequencing technology (**Table 1**), which was used for the  
129 following genome survey analysis, and for final base-level genome sequence  
130 correction. Meanwhile, four 20 kb libraries were constructed for PacBio Sequel  
131 sequencing. Using 16 sequencing SMRT cells, 104.6 Gb long reads were generated  
132 (**Table 1**). The mean and N50 lengths of the polymerases for sequencing cells ranged  
133 from 6.4 kb to 10.4 kb and from 12.3 kb to 20.3 kb for cells, respectively. Those long  
134 genomic DNA reads were used for reference genome construction.

135

### 136 **Genome features estimation from Kmer method**

137 With sequencing data from the Illumina platform, several genome characters could be  
138 evaluated for *A. fulica*. To ensure the quality of the analysis, ambiguous bases and  
139 low-quality reads were trimmed and filtered using the HTQC package (version  
140 1.92.3)[21]. The following quality control were performed under the framework of

141 HTQC. First, the qualities of bases at two read ends were checked. Bases in sliding 5  
142 bp windows were deleted if the average quality of the window was below phred quality  
143 score of 20. Second, reads were filtered if the average phred quality score were  
144 smaller than 20 or the read length was shorter than 75 bp. Third, the mate reads were  
145 also removed if the corresponding reads were filtered.

146 The quality-controlled reads were used for genome character estimation. We  
147 calculated the number of each 17-mer from the sequencing data using the jellyfish  
148 software (version 2.0)[22], and the distribution was analyzed with GCE software  
149 (version 3)[23] and was shown in Figure 2. We estimated the genome size of 2.12 Gb  
150 with the heterozygosity of 0.47% and repeat content of 71% in the genome. Previous  
151 studies revealed that repeat content varies in mollusks, and that repeat content is  
152 correlated with genome size[24]. The large genome size and high proportion of repeat  
153 contents of *A. fulica* provided additional supporting data for the statistical analysis.  
154 Moreover, 10,000 pairs of short reads were extracted randomly and were compared to  
155 the nt database and no obvious external contamination were found.

### 156 **Genome assembly by third-generation long reads**

157 After removing adaptor sequences in polymerases, 101.6 Gb subreads were  
158 generated for the following whole genome assembly. The average and N50 length of  
159 subreads reached 5.25 kb and 8.80 kb, respectively. To optimize the genome  
160 assembly using the PacBio sequencing data, we applied two packages in the  
161 assembly process, Canu v1.8 [25] and FALCON v0.2.2 [26]. Canu package was first  
162 applied for the assembly with the default parameters. As a result, a 1.93 Gb genome  
163 was constructed with 10,417 contigs and a contig N50 length of 662.40 kb. FALCON  
164 was also employed using the length\_cutoff and pr\_length\_cutoff parameters of 10 kb  
165 and 8 kb, respectively. We obtained 1.85 Gb genome with 8,585 contigs, with a contig  
166 N50 of 726.63 kb. We adopted the FALCON assembly as the reference genome for *A.*  
167 *fulica* (**Table 2**). The genome sequences were subsequently polished by PacBio long

168 reads using arrow[27] and Illumina short reads by pilon[28] to correct base errors. The  
169 corrected genome was further applied for the following chromosome assembly  
170 construction using Hi-C data.

### 171 ***In situ* Hi-C library construction and chromosome assembly using Hi-C** 172 **data**

173 Liver pancreas tissue of *A. fulica* was used for library construction for Hi-C analysis  
174 and the library was constructed using the identical method in previous studies[29].  
175 Finally, the library was sequenced with 150 paired-end mode on the Illumina HiSeq X  
176 Ten platform (San Diego, CA, United States). From the Illumina sequencing platform,  
177 1,313.87 million paired-end reads were obtained for the Hi-C library (**Table 1**). The  
178 reads were mapped to the above *A. fulica* genome with Bowtie2 [30], with two ends of  
179 paired reads being mapped to the genome separately. To increase the interactive Hi-C  
180 reads ratio, an iterative mapping strategy was performed as previous studies, and  
181 only read pairs with both ends uniquely mapped were used for the following analysis.  
182 From the alignment status of two ends, self-ligation, non-ligation and other sorts of  
183 invalid reads, including StartNearRsite, PCR amplification, random break,  
184 LargeSmallFragments and ExtremeFragments, were filtered out by Hi-Clib[31].  
185 Through the recognition of restriction sites in sequences, contact counts among  
186 contigs were calculated and normalized.

187 According to previous karyotype analyses, *A. fulica* has 31 chromosomes[32]. By  
188 clustering the contigs using the contig contact frequency matrix, we were able to  
189 correct some minor errors in the FALCON assembly results. Contigs with errors were  
190 broken into shorter contigs. We obtained 8,701 contigs, slightly more than the 8,585  
191 contigs in the FALCON assembly. We successfully clustered these contigs into 31  
192 groups in Lachesis[33] using the agglomerative hierarchical clustering method  
193 (**Figure 3**). Lachesis was further applied to order and orient the clustered contigs  
194 according to the contact matrix. As a result, 7,106 contigs were reliably anchored,



195 ordered and orientated on chromosomes, accounting for 99.32% of the total genome  
196 bases. The first near chromosomal-level assembly of *A. fulica* was obtained with  
197 8,211 contigs, a contig N50 of 721.0 kb and a scaffold N50 of 59.59 Mb (**Table 2** and  
198 **Table 3**).

### 199 **Genome quality evaluation**

200 We assessed the quality of genome of *A. fulica* after the assembly process. The  
201 quality evaluation was carried out in three aspects: continuity, completeness and the  
202 mapping rate of NGS data.

203 First of all, we compared the sequence number and contig N50 length of *A. fulica*  
204 with public genome of mollusks and found that our assembly has a high quality on  
205 contig and scaffold N50 among mollusk genomes. (**Table 3**) Traditional chromosomal  
206 genome assembly requires physical maps and genetic maps, which is enormously  
207 time- and labor-consuming. With Hi-C data analysis, we successfully assembled *A.*  
208 *fulica* genome into near chromosome-level with just one individual.

209 Second, the assembled genome was subjected to the BUSCO (version 3.0,  
210 metazoa\_odb9)[34] to assess the completeness of the genome. About 91.7% of the  
211 BUSCO genes were identified in *A. fulica* genome, and more than 84.7% of the  
212 BUSCO genes were single-copy completed in our genome, illuminating a high level of  
213 completeness of the genome.

214 Third, NGS short reads were aligned to the genome using BWA package (version  
215 0.7.17)[35], and about 98.7% of paired reads were aligned to the genome, of which  
216 98.24% were reads paired aligned.

### 217 **Repeat element and gene annotation**

218 Tandem Repeat Finder4.09 (TRF)[36] was used for repetitive element identification in  
219 the *A. fulica* genome. A *de novo* method applying RepeatModeler was used to detect  
220 transposable elements (TEs). The resulted *de novo* data, combined with known

221 repeat library from Repbase[37], were used to identify TEs in the *A. fulica* genome by  
222 RepeatMasker4-0-8 [38] software. All repetitive elements were masked in the genome  
223 before protein-coding gene prediction.

224 Protein-coding genes in the *A. fulica* genome were annotated using the *de novo*  
225 program Augustus0.2.1 [39]. Protein sequences of the closely related species  
226 including *Aplysia californica*, *Biomphalaria glabrata*, *Crassostrea gigas*, *Lottia*  
227 *gigantea* and *Patinopecten yessoensis*, were downloaded from the Ensembl  
228 database, and aligned to the *A. fulica* genome with TBLASTN2.6.0. Full-length  
229 transcripts obtained using Iso-Seq were mapped to the genome using Genewise[40].  
230 Finally, gene models predicted from all above methods were combined by  
231 MAKERV2.31.10 [41], resulting in 23,726 protein-coding genes. The gene number,  
232 gene length, CDS length, exon length and intron length distribution were all  
233 comparable with the related mollusks (**Figure 4**).

234 To functionally annotate protein-coding genes in the *A. fulica* genome, we  
235 searched all predicted gene sequences to NCBI non-redundant nucleotide (NT) and  
236 protein (NR), Swiss-Prot databases by BLASTN[42] and BLASTX[43] utility.  
237 Blast2GO[44] was also used to assign gene ontology (GO)[45] and Kyoto  
238 Encyclopedia of Genes and Genomes (KEGG)[46] pathways. A threshold of e-value  
239 of 1e-5 was used for all BLAST applications. Finally, 22,858 (96.34%) genes were  
240 functionally annotated (**Table 4**).

#### 241 **Phylogenetic analysis of *A. fulica* with other mollusks**

242 OrthoMCLv1.2 [47] was used to cluster gene families. First, proteins from *A. fulica*  
243 and the closely related mollusks, including *Aplysia californica*, *Biomphalaria glabrata*,  
244 *Crassostrea gigas*, *Lingula anatina*, *Lottia gigantea*, *Patinopecten yessoensis*,  
245 *Octopus bimaculoides*, *Helobdella robusta*, *Pomacea canaliculata*, and the outgroup,  
246 *Drosophila melanogaster*, were all-to-all blasted by BLASTP[43] utility with an e-value  
247 threshold of 1e-5. Only proteins from the longest transcript were used for genes with

248 alternative isoforms. We identified 25,448 gene families for *A. fulica* and the related  
249 species, among them 675 single-copy orthologs families were detected.

250 Using single-copy orthologs, we could probe the phylogenetic relationships for  
251 the *A. fulica* and other mollusks. To this end, protein sequences of single-copy genes  
252 were aligned using CLUSTALX2.0 [48]. Guided by the protein multi-sequence  
253 alignment, the alignment of the coding DNA sequences (CDS) for those genes were  
254 generated and concatenated for the following analysis. The phylogenetic relationships  
255 were constructed using PhyML3.0 [49] using the concatenated nucleotide alignment  
256 with the JTT+G+F model. The MCMCtree program in PAML4 [49] was used to  
257 estimate the species divergent time scales for the mollusks using approximate  
258 likelihood method and calibrated according to the records downloaded from Timetree  
259 ([www.timetree.org](http://www.timetree.org)). We found that *A. fulica* was most closely related to *Biomphalaria*  
260 *glabrata*, and the two species diverged from their common ancestor about 179.17  
261 million years ago (MYA) (**Figure 5**).

## 262 **Conclusion**

263 We reconstructed the first chromosome level assembly for *A. fulica* using an  
264 integrated strategy of PacBio, Illumina and Hi-C technologies. Using the long reads  
265 from PacBio Sequel platform and short reads from the Illumina X Ten platform, we  
266 successfully constructed contig assembly for *A. fulica*. Leveraging contact information  
267 among contigs from Hi-C technology, we further improved the assembly to the near  
268 chromosome-level quality (**Table 3** and **Figure 3**). We predicted 23,726 protein-coding  
269 genes in the *A. fulica* genome and 22,858 of genes were functionally annotated with  
270 putative functions. With 675 single-copy orthologs from *A. fulica* and other related  
271 mollusks, we constructed the phylogenetic relationship of these mollusks, and found  
272 that *A. fulica* might have diverged from its common ancestor of *Biomphalaria glabrata*  
273 around 177.1-187.1 MYA. Given the increasing interests in mollusk genomic evolution  
274 and the biological importance of *A. fulica* as an invasive animal, our genomic and

275 transcriptome data provide valuable genetic resource for the following functional  
276 genomics investigations for the research community.

277

### 278 **Ethics Statement**

279 This study was approved by the Animal Care and Use committee of National Institute  
280 of Parasitic Diseases, Chinese Center for Disease Control and Prevention. All  
281 participants consent the study under the 'Ethics, consent and permissions' heading.  
282 All participants consent to publish the work under the 'Consent to publish' heading.

### 283 **Availability of supporting data**

284 The Illumina, PacBio and Hi-C sequencing data are available from NCBI via the  
285 accession number of SRR8369706, SRR8369311 and SRR8371669, respectively.  
286 The Illumina transcriptome sequencing data were deposited to NCBI via the  
287 accession number of SRR8371872 and SRR8371873. The genome, annotation and  
288 intermediate files were uploaded to GigaScience FTP server.

### 289 **Competing interests**

290 The authors declare that they have no competing interests.

### 291 **Acknowledgement**

292 This work was supported by the National Key Research and Development Program of  
293 China (No. 2016YFC1200500, 2016YFC1200502, 2016YFC1200503 and  
294 2016YFC1202000). The authors thank Frasergen Bioinformatics for providing  
295 technique supports for this work.

### 296 **Author Contributions**

297 Z.X, H.W and X.N conceived the project. G.Y, Z.Y, L.Q collected the samples and  
298 extracted the genomic DNA. G.Y, Z.Y and L.Q performed the genome assembly and  
299 data analysis. G.Y, Z.X, H.W and X.N wrote the paper.

300 **References**

- 301 1. Schreurs J. *Investigations on the biology, ecology and control of Giant African Snail 290 in*  
302 *West New Guinea.* 1963. Manokwari Agricultural Research Station.
- 303 2. Albuquerque FS, Peso-Aguiar MC and Assunção-Albuquerque MJ. Distribution,feeding  
304 behavior and control strategies of the exotic land snail *Achatinafulica*  
305 (*Gastropoda:Pulmonata*) in the Northeast of Brazil. *BrazJ Biol.* 2008;68:6.
- 306 3. Thiengo SC, Fernandez MA, Torres EJ, Coelho PM and Lanfredi RM. First record of anematode  
307 *Metastrongyloidea* (*Aelurostrongylus abstrusus* larvae) in *Achatina* (*Lissachatina*) *fulica*  
308 (*Mollusca,Achatinidae*) in Brazil. *J Invertebr Pathol.* 2008;98:6.
- 309 4. Lv S, Zhang Y and Liu HX. Invasive Snails and an Emerging Infectious Disease: Results from the  
310 First National Survey on *Angiostrongylus cantonensis* in China. *BioOne.* 2009;  
311 doi:10.1371/journal.pntd.0000368.
- 312 5. Cowie RH. *Non-indigenous land and freshwater molluscs in the islands of the Pacific:*  
313 *Conservation impacts and threats.* 2000.
- 314 6. Cowie RH. Can snails ever be effective and safe biocontrol agents? *Int J Pest Manage.*  
315 2001;47:18.
- 316 7. Cowie RH and Robinson DG. Pathways of introduction of nonindigenous land and freshwater  
317 snails and slugs. Washington DC: Island Press; 2003.
- 318 8. Kotangale JP. Giant African snail (*Achatina fulica* Bowdich). 2011;*J Environ Sci Eng* 53:6.
- 319 9. Raut SK and Barker GM. *Achatina fulica* Bowdich and Other *Achatinidae* as Pests in Tropical  
320 Agriculture. UK: CABI International; 2002.
- 321 10. Jarreit VHC. The spread of the snail *Achatina fulica* to south China. *Hong Kong Nat.* 1931;2:3.
- 322 11. Shan L, Yi Z and Peter S. Emerging *Angiostrongyliasis* in Mainland China. *Emerging Infectious*  
323 *Diseases.* 2008;14 1:4.
- 324 12. Lowe S, Browne SM, Boudjrlas S and De Poorter M. 100 of the world's worst invasive alien  
325 species: A selection from the global invasive species database. The Invasive Species  
326 Specialists Group of the Species Survival Commission of the World Conservation Union.  
327 Auckland: Hollands Printing; 2000.
- 328 13. Mead AR. *Pulmonates volume 2B. Economic malacology with particular reference to*  
329 *Achatina fulica.* London: Academic Press; 1979.
- 330 14. Alicata JE. The discovery of *Angiostrongylus cantonensis* as a cause of human eosinophilic  
331 meningitis. *Parasitol Today.* 1991;7 6:151-3.
- 332 15. Prociv P, Spratt DM and Carlisle MS. Neuro-angiostrongyliasis: unresolved issues. *Int J*  
333 *Parasitol.* 2000;30 12-13:1295-303.
- 334 16. Deng ZH, Zhang QM, Huang SY and Jones JL. First provincial survey of *Angiostrongylus*  
335 *cantonensis* in Guangdong Province, China. *Trop Med Int Health.* 2012;17:4.
- 336 17. Maldonado JA, Simoes RO, Oliveira AP, Motta EM, Fernandez MA, Pereira ZM, et al. First  
337 report of *Angiostrongylus cantonensis* (*Nematoda: Metastrongylidae*) in *Achatina fulica*  
338 (*Mollusca: Gastropoda*) from Southeast and South Brazil. *Mem Inst Oswaldo Cruz.*  
339 2010;105:4.
- 340 18. Vitta A, Polseela R, Nateeworanart S and Tattiyapong M. Survey of *Angiostrongylus*  
341 *cantonensis* in rats and giant African land snails in Phitsanulok Province, Thailand. *Asian Pac J*  
342 *Trop Med.* 2011;4:3.
- 343 19. Liu C, Zhang Y, Ren Y, Wang H, Li S, Jiang F, et al. The genome of the golden apple snail

- 344 Pomacea canaliculata provides insight into stress tolerance and invasive adaptation.  
345 GigaScience. 2018;7 9 doi:10.1093/gigascience/giy101.
- 346 20. Adema CM, Hillier LW, Jones CS, Loker ES, Knight M, Minx P, et al. Whole genome analysis of  
347 a schistosomiasis-transmitting freshwater snail. Nature communications. 2017;8:15451.  
348 doi:10.1038/ncomms15451.
- 349 21. Neff KL, Argue DP, Ma AC, Lee HB, Clark KJ and Ekker SC. Mojo Hand, a TALEN design tool for  
350 genome editing applications. BMC Bioinformatics. 2013;14:1. doi:10.1186/1471-2105-14-1.
- 351 22. Marçais G and Kingsford C. A fast, lock-free approach for efficient parallel counting of  
352 occurrences of k-mers. Bioinformatics. 2011;27 6:764-70.  
353 doi:10.1093/bioinformatics/btr011.
- 354 23. Binghang Liu YS, Jianying Yuan,Xuesong Hu,Hao Zhang,Nan Li,Zhenyu Li,Yanxiang  
355 Chen,Desheng Mu,Wei Fan. Estimation of genomic characteristics by analyzing k-mer  
356 frequency in de novo genome projects. Quantitative Biology. 2013;35:62-7.
- 357 24. Murgarella M, Puiu D, Novoa B, Figueras A, Posada D and Canchaya C. A First Insight into the  
358 Genome of the Filter-Feeder Mussel Mytilus galloprovincialis. PloS one. 2016;11 3:e0151561.  
359 doi:10.1371/journal.pone.0151561.
- 360 25. Koren S, Walenz BP, Berlin K, Miller JR, Bergman NH and Phillippy AM. Canu: scalable and  
361 accurate long-read assembly via adaptive k-mer weighting and repeat separation. Genome  
362 Res. 2017;27 5:722-36. doi:10.1101/gr.215087.116.
- 363 26. Chin CS, Peluso P, Sedlazeck FJ, Nattestad M, Concepcion GT, Clum A, et al. Phased diploid  
364 genome assembly with single-molecule real-time sequencing. Nat Methods. 2016;13  
365 12:1050-4. doi:10.1038/nmeth.4035.
- 366 27. Chin C-S, Alexander DH, Marks P, Klammer AA, Drake J, Heiner C, et al. Nonhybrid, finished  
367 microbial genome assemblies from long-read SMRT sequencing data. Nature methods.  
368 2013;10 6:563.
- 369 28. Walker BJ, Abeel T, Shea T, Priest M, Abouelliel A, Sakthikumar S, et al. Pilon: an integrated  
370 tool for comprehensive microbial variant detection and genome assembly improvement.  
371 PloS one. 2014;9 11:e112963.
- 372 29. Gong G, Dan C, Xiao S, Guo W, Huang P, Xiong Y, et al. Chromosomal-level assembly of yellow  
373 catfish genome using third-generation DNA sequencing and Hi-C analysis. Gigascience. 2018;  
374 doi:10.1093/gigascience/giy120.
- 375 30. Langmead B, Trapnell C, Pop M and Salzberg SL. Ultrafast and memory-efficient alignment of  
376 short DNA sequences to the human genome. Genome Biol. 2009;10 3:R25.  
377 doi:10.1186/gb-2009-10-3-r25.
- 378 31. Burton JN, Adey A, Patwardhan RP, Qiu R, Kitzman JO and Shendure J. Chromosome-scale  
379 scaffolding of de novo genome assemblies based on chromatin interactions. Nature  
380 biotechnology. 2013;31 12:1119.
- 381 32. Sun T. Chromosomal studies in three land snails. Sinozoologia. 1995;12:154-62.
- 382 33. Near TJ, Dornburg A, Eytan RI, Keck BP, Smith WL, Kuhn KL, et al. Phylogeny and tempo of  
383 diversification in the superradiation of spiny-rayed fishes. Proceedings of the National  
384 Academy of Sciences of the United States of America. 2013;110 31:12738.
- 385 34. Simão FA, Waterhouse RM, Ioannidis P, Kriventseva EV and Zdobnov EM. BUSCO: assessing  
386 genome assembly and annotation completeness with single-copy orthologs. Bioinformatics.  
387 2015;31 19:3210-2.

- 388 35. Li H and Durbin R. Fast and accurate short read alignment with Burrows–Wheeler transform.  
389 bioinformatics. 2009;25 14:1754-60.
- 390 36. Benson G. Tandem repeats finder: a program to analyze DNA sequences. *Nucleic Acids Res.*  
391 1999;27 2:573-80.
- 392 37. Bao W, Kojima KK and Kohany O. Repbase Update, a database of repetitive elements in  
393 eukaryotic genomes. *Mob DNA.* 2015;6:11. doi:10.1186/s13100-015-0041-9.
- 394 38. Chen N. Using RepeatMasker to identify repetitive elements in genomic sequences. *Current*  
395 *protocols in bioinformatics.* 2004;5 1:4.10. 1-4.. 4.
- 396 39. Stanke M, Keller O, Gunduz I, Hayes A, Waack S and Morgenstern B. AUGUSTUS: ab initio  
397 prediction of alternative transcripts. *Nucleic acids research.* 2006;34 suppl\_2:W435-W9.
- 398 40. Birney E, Clamp M and Durbin R. GeneWise and genomewise. *Genome research.* 2004;14  
399 5:988-95.
- 400 41. Cantarel BL, Korf I, Robb SM, Parra G, Ross E, Moore B, et al. MAKER: an easy-to-use  
401 annotation pipeline designed for emerging model organism genomes. *Genome research.*  
402 2008;18 1:188-96.
- 403 42. Gertz EM, Yu YK, Agarwala R, Schaffer AA and Altschul SF. Composition-based statistics and  
404 translated nucleotide searches: improving the TBLASTN module of BLAST. *BMC Biol.*  
405 2006;4:41. doi:10.1186/1741-7007-4-41.
- 406 43. Camacho C, Coulouris G, Avagyan V, Ma N, Papadopoulos J, Bealer K, et al. BLAST+:  
407 architecture and applications. *BMC Bioinformatics.* 2009;10:421.  
408 doi:10.1186/1471-2105-10-421.
- 409 44. Conesa A, Götz S, García-Gómez JM, Terol J, Talón M and Robles M. Blast2GO: a universal  
410 tool for annotation, visualization and analysis in functional genomics research.  
411 *Bioinformatics.* 2005;21 18:3674-6.
- 412 45. Consortium GO. The Gene Ontology (GO) database and informatics resource. *Nucleic acids*  
413 *research.* 2004;32 suppl\_1:D258-D61.
- 414 46. Kanehisa M and Goto S. KEGG: kyoto encyclopedia of genes and genomes. *Nucleic acids*  
415 *research.* 2000;28 1:27-30.
- 416 47. Li L, Stoeckert CJ and Roos DS. OrthoMCL: identification of ortholog groups for eukaryotic  
417 genomes. *Genome research.* 2003;13 9:2178-89.
- 418 48. Thompson JD, Gibson TJ and Higgins DG. Multiple sequence alignment using ClustalW and  
419 ClustalX. *Current protocols in bioinformatics.* 2003; 1:2.3. 1-2.3. 22.
- 420 49. Guindon S, Lethiec F, Duroux P and Gascuel O. PHYML Online—a web server for fast  
421 maximum likelihood-based phylogenetic inference. *Nucleic acids research.* 2005;33  
422 suppl\_2:W557-W9.
- 423 50. Zhang G, Fang X, Guo X, Li L, Luo R, Xu F, et al. The oyster genome reveals stress adaptation  
424 and complexity of shell formation. *Nature.* 2012;490 7418:49-54. doi:10.1038/nature11413.
- 425 51. Takeuchi T, Kawashima T, Koyanagi R, Gyoja F, Tanaka M, Ikuta T, et al. Draft genome of the  
426 pearl oyster *Pinctada fucata*: a platform for understanding bivalve biology. *DNA research : an*  
427 *international journal for rapid publication of reports on genes and genomes.* 2012;19  
428 2:117-30. doi:10.1093/dnares/dss005.
- 429 52. Takeuchi T, Koyanagi R, Gyoja F, Kanda M, Hisata K, Fujie M, et al. Bivalve-specific gene  
430 expansion in the pearl oyster genome: implications of adaptation to a sessile lifestyle.  
431 *Zoological letters.* 2016;2:3. doi:10.1186/s40851-016-0039-2.

- 432 53. Du X, Fan G, Jiao Y, Zhang H, Guo X, Huang R, et al. The pearl oyster *Pinctada fucata martensii*  
433 genome and multi-omic analyses provide insights into biomineralization. *GigaScience*. 2017;6  
434 8:1-12. doi:10.1093/gigascience/gix059.
- 435 54. Mun S, Kim YJ, Markkandan K, Shin W, Oh S, Woo J, et al. The Whole-Genome and  
436 Transcriptome of the Manila Clam (*Ruditapes philippinarum*). *Genome biology and evolution*.  
437 2017;9 6:1487-98. doi:10.1093/gbe/evx096.
- 438 55. Wang S, Zhang J, Jiao W, Li J, Xun X, Sun Y, et al. Scallop genome provides insights into  
439 evolution of bilaterian karyotype and development. *Nature ecology & evolution*. 2017;1  
440 5:120. doi:10.1038/s41559-017-0120.
- 441 56. Schell T, Feldmeyer B, Schmidt H, Greshake B, Tills O, Truebano M, et al. An annotated draft  
442 genome for *Radix auricularia* (Gastropoda, Mollusca). *Genome biology and evolution*. 2017;  
443 doi:10.1093/gbe/evx032.
- 444 57. Albertin CB, Simakov O, Mitros T, Wang ZY, Pungor JR, Edsinger-Gonzales E, et al. The  
445 octopus genome and the evolution of cephalopod neural and morphological novelties.  
446 *Nature*. 2015;524 7564:220-4. doi:10.1038/nature14668.
- 447 58. Simakov O, Marletaz F, Cho SJ, Edsinger-Gonzales E, Havlak P, Hellsten U, et al. Insights into  
448 bilaterian evolution from three spiralian genomes. *Nature*. 2013;493 7433:526-31.  
449 doi:10.1038/nature11696.
- 450 59. Kenny NJ, Namigai EK, Marletaz F, Hui JH and Shimeld SM. Draft genome assemblies and  
451 predicted microRNA complements of the intertidal lophotrochozoans *Patella vulgata*  
452 (Mollusca, Patellogastropoda) and *Spirobranchus* (*Pomatoceros*) *lamarcki* (Annelida,  
453 Serpulida). *Marine genomics*. 2015;24 Pt 2:139-46. doi:10.1016/j.margen.2015.07.004.
- 454 60. Barghi N, Concepcion GP, Olivera BM and Lluisma AO. Structural features of conopeptide  
455 genes inferred from partial sequences of the *Conus tribblei* genome. *Molecular genetics and*  
456 *genomics* : MGG. 2016;291 1:411-22. doi:10.1007/s00438-015-1119-2.
- 457 61. Uliano-Silva M, Dondero F, Dan Otto T, Costa I, Lima NCB, Americo JA, et al. A  
458 hybrid-hierarchical genome assembly strategy to sequence the invasive golden mussel,  
459 *Limnoperna fortunei*. *GigaScience*. 2018;7 2 doi:10.1093/gigascience/gix128.
- 460 62. Sun J, Zhang Y, Xu T, Zhang Y, Mu H, Zhang Y, et al. Adaptation to deep-sea chemosynthetic  
461 environments as revealed by mussel genomes. *Nature ecology & evolution*. 2017;1 5:121.  
462 doi:10.1038/s41559-017-0121.
- 463 63. Jiao W, Fu X, Dou J, Li H, Su H, Mao J, et al. High-resolution linkage and quantitative trait  
464 locus mapping aided by genome survey sequencing: building up an integrative genomic  
465 framework for a bivalve mollusc. *DNA research* : an international journal for rapid publication  
466 of reports on genes and genomes. 2014;21 1:85-101. doi:10.1093/dnares/dst043.
- 467 64. Luo YJ, Takeuchi T, Koyanagi R, Yamada L, Kanda M, Khalturina M, et al. The *Lingula* genome  
468 provides insights into brachiopod evolution and the origin of phosphate biomineralization.  
469 *Nature communications*. 2015;6:8301. doi:10.1038/ncomms9301.
- 470 65. Li C, Liu X, Liu B, Ma B, Liu F, Liu G, et al. Draft genome of the Peruvian scallop *Argopecten*  
471 *purpuratus*. *GigaScience*. 2018;7 4 doi:10.1093/gigascience/giy031.
- 472
- 473



474

475 **Tables and Figures**476 **Table 1: Sequencing data generated for *A. fulica* genome assembly and annotation**

| Library type | Platform      | Library size (bp) | Data size (Gb) | Application                               |
|--------------|---------------|-------------------|----------------|-------------------------------------------|
| Short reads  | HiSeq X Ten   | 350               | 202.24         | Genome survey and genomic base correction |
| Long reads   | PacBio SEQUEL | 20,000            | 101.63         | Genome assembly                           |
| Hi-C         | HiSeq X Ten   | 300-500           | 199.73         | Chromosome construction                   |

477

478

479

480 **Table 2: Statistics for genome assembly of *A. fulica***

| Sample ID | Length        |               | Number   |          |
|-----------|---------------|---------------|----------|----------|
|           | Contig** (bp) | Scaffold (bp) | Contig** | Scaffold |
| Total     | 1,852,282,574 | 1,855,883,074 | 8,211    | 1,010    |
| Max       | 5,947,392     | 116,558,012   | -        | -        |
| N50       | 721,038       | 59,589,303    | 697      | 13       |
| N60       | 538,883       | 58,013,356    | 995      | 16       |
| N70       | 399,612       | 53,672,006    | 1,396    | 20       |
| N80       | 268,901       | 50,673,968    | 1,957    | 23       |
| N90       | 141,756       | 44,109,545    | 2,888    | 27       |

481 The two stars (\*\*) means the ultimate contigs since they were probably modified during  
 482 the Hic step.

483

484

485

486

487

488

489

490

491

492

493

494

495

496

497

498

499

500 Table 3 Summary of the genome of *A. fulica* and other published mollusk genomes.

| Species                               | Size* (Mb) | Contig N50 (kb) | Scaffold N50 (kb) |
|---------------------------------------|------------|-----------------|-------------------|
| <i>Achatina fulica</i> (this study)** | 2,120      | 721             | 59,590            |
| <i>Pomacea canaliculata</i> [19]**    | 570        | 995             | 38,000            |
| <i>Crassostrea gigas</i> [50]         | 545        | 7.5             | 401               |
| <i>Pinctada fucata</i> [51]           | 1,150      | 1.6             | 14.5              |
| <i>Pinctada fucata new</i> [52]       | 1,150      | 21              | 324               |
| <i>Pinctada fucata V2</i> [53]        | 1,150      | 21              | 167               |
| <i>Biomphalaria glabrata</i> [20]     | 931        | 7.3             | 48                |
| <i>Ruditapes philippinarum</i> [54]   | 1,370      | 3.3             | 32.7              |
| <i>Patinopecten yessoensis</i> [55]** | 1,430      | 38              | 41,000            |
| <i>Radix auricularia</i> [56]         | 1,600      | 0.324           | 578               |
| <i>Octopus bimaculoides</i> [57]      | 2,800      | 5.4             | 470               |
| <i>Mytilus galloprovincialis</i> [24] | 1,600      | 2.6             | 2.9               |
| <i>Lottia gigantea</i> [58]           | 420        | 96              | 1,870             |
| <i>Patella vulgata</i> [59]           | 1,460      | 3.1             | 3.1               |
| <i>Aplysia californica</i>            | 1,760      | 9.6             | 917               |
| <i>Conus tribblei</i> [60]            | 2,760      | 0.85            | 215               |
| <i>Limnoperna fortunei</i> [61]       | 1,600      | 10              | 312               |
| <i>Bathymodiolus platifrons</i> [62]  | 1,640      | 13.2            | 343               |
| <i>Modiolus philippinarum</i> [62]    | 2,380      | 19.7            | 100.2             |
| <i>Chlamys farreri</i> [63]           | 1,200      | 1.2             | 1.5               |
| <i>Lingula anatina</i> [64]           | 463        | 55              | 294               |
| <i>Argopecten purpuratus</i> [65]     | 885        | 80.1            | 1,020             |

501 \* Estimated the genome size

502 \*\* Genomes assembled into near chromosomal level

503

504 **Table 4: Statistics for genome annotation of *A. fulica***

| Database  | Number | Percent |
|-----------|--------|---------|
| InterPro  | 16,252 | 68.50   |
| GO        | 12,101 | 51.00   |
| KEGG ALL  | 21,325 | 89.88   |
| KEGG KO   | 10,161 | 42.83   |
| Swissprot | 17,050 | 71.86   |
| TrEMBL    | 22,403 | 94.42   |
| NR        | 22,553 | 95.06   |
| Total     | 23,726 |         |

505

506

507

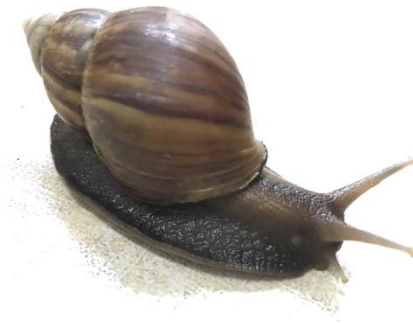

508

509 **Figure 1. *A. fulica* individual used for genome sequencing and assembly.**

510

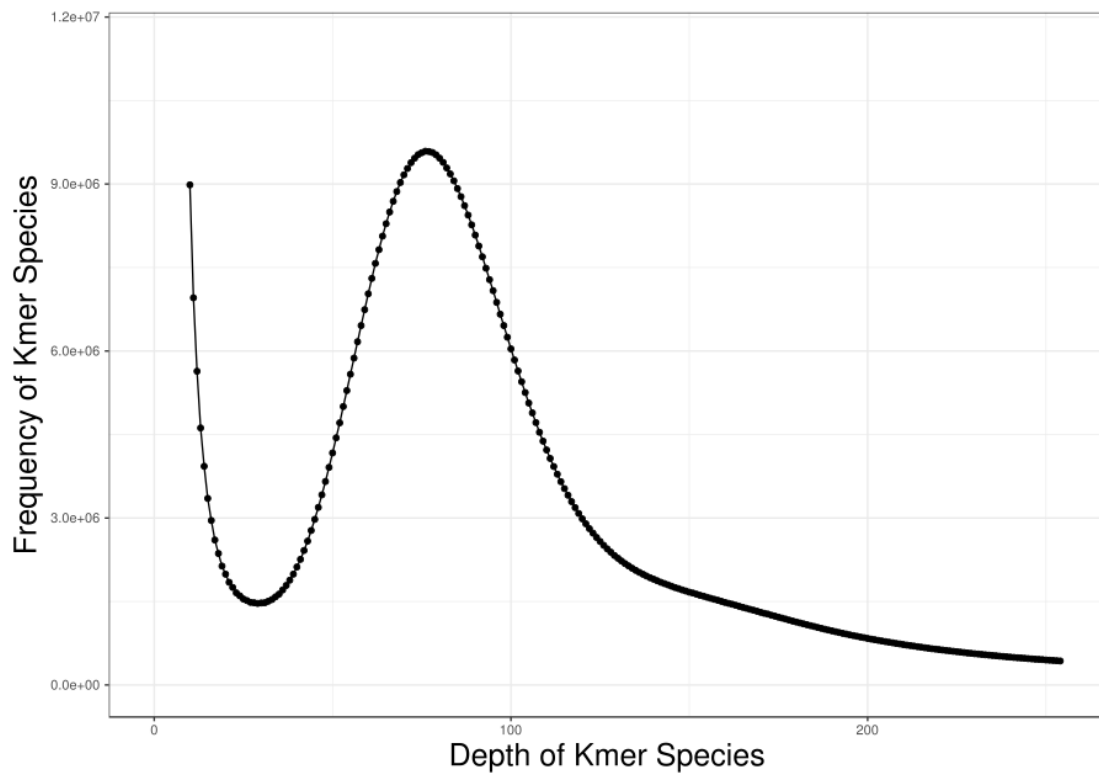

511

512 **Figure 2. The distribution of *Kmer* species estimated for *A. fulica*.** The total number

513 of *Kmer* species is 178,847,565,204, with the peak value (depth) is 76.

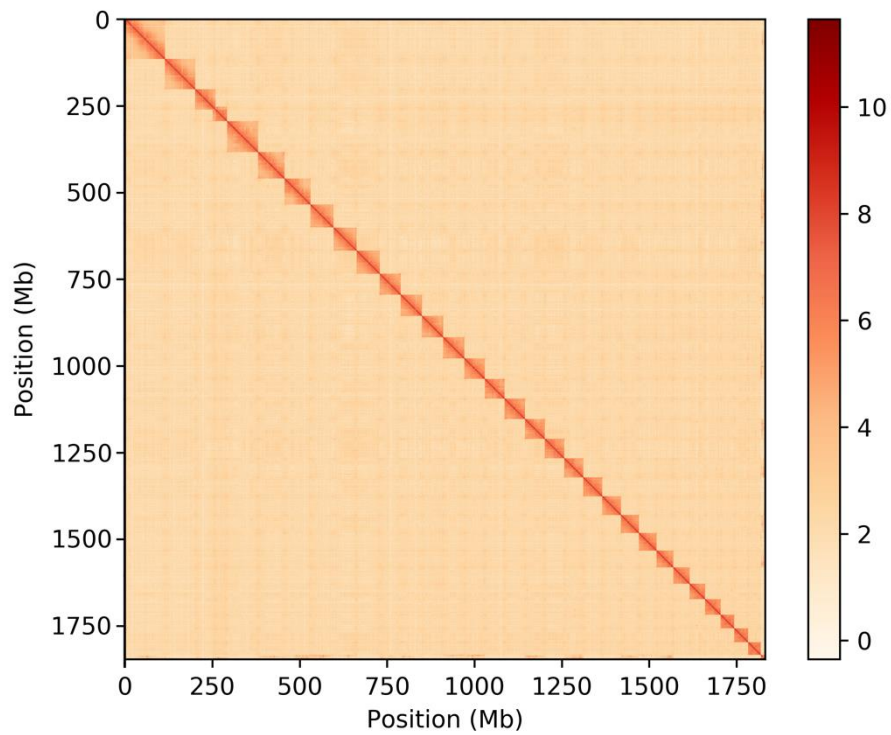

515

516 **Figure 3. Contact matrix generated from the Hi-C data analysis showing sequence**517 **interactions in chromosomes.** The logarithm of the contact density was showed in the

518 color bar.

519

520

521

522

523

524

525

526

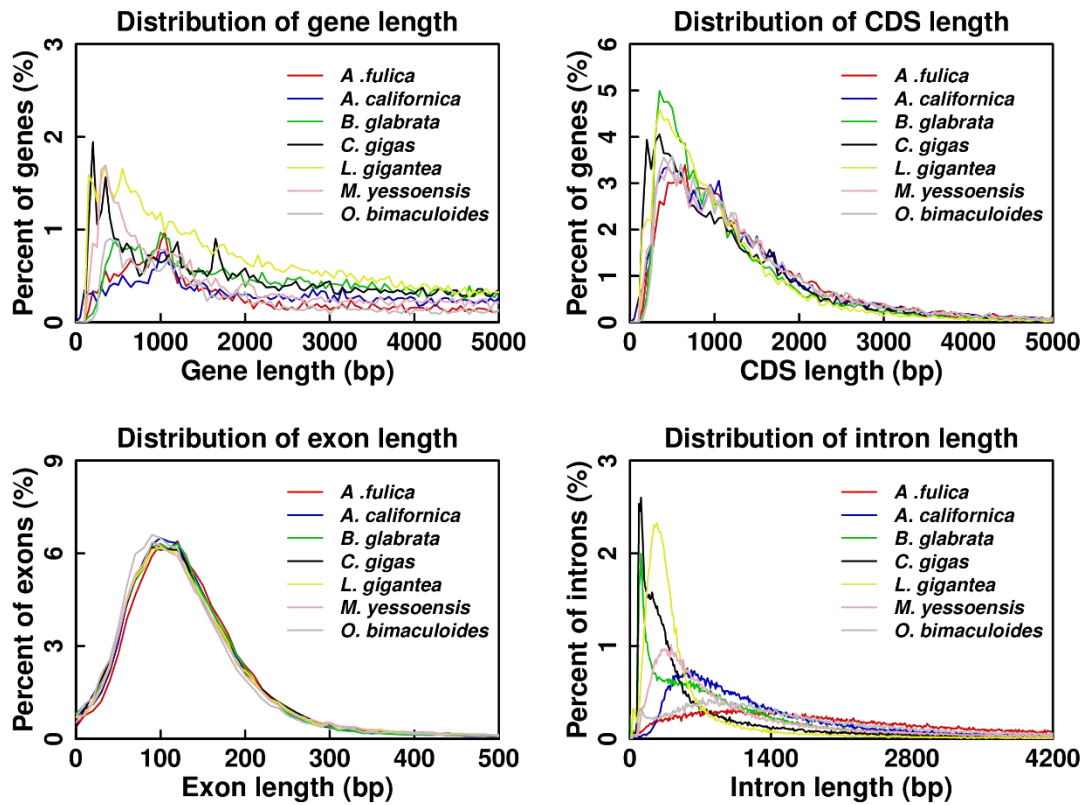

528

529

530 **Figure 4. Length distribution comparison on total gene, CDS, exon, and intron of**531 **annotated gene models of *A. fulica* with other closely related insect species. The**532 **comparison of length distribution of genes (A), CDS (B), exon (C) and intron (D) for *A.***533 ***fulica* to those in *A. californica* , *B. glabrata* , *C. gigas* , *L. gigantea* , *P. yessoensis* and *O.***534 ***bimaculoides*.**

535

536

537

538

539

540

541

542

543

544

545

546

547

548

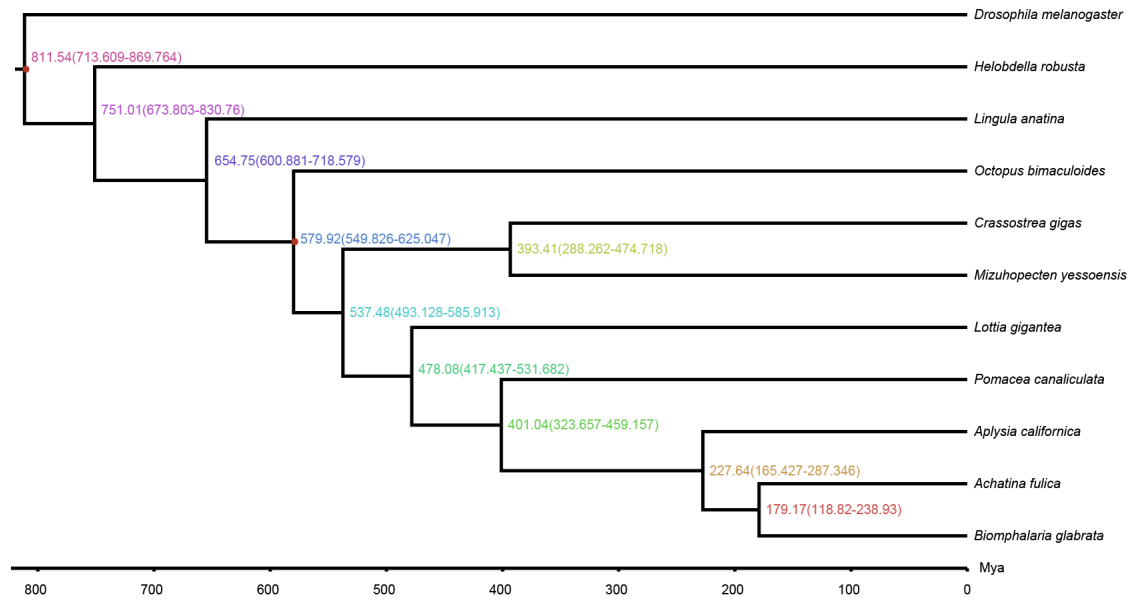

549

550 **Figure 5. Phylogenetic relationship between *A. fulica* and related species.** The

551 divergence time (million years ago) and the 95% confidential intervals are labeled at

552 branch sites and the red dots in the tree illuminated the speciation for the time

553 recalibration.

554
